# Supplementary material for: The senescence-associated secretory phenotype is potentiated by feedforward regulatory mechanisms involving Zscan4 and TAK1
Source: PubMed Central journal article supplement (PMC5928226; doi:10.1038/s41467-018-04010-4), 2018-04-30
Supplement: 41467_2018_4010_MOESM1_ESM.pdf [file 41467_2018_4010_MOESM1_ESM.pdf]

The senescence-associated secretory phenotype is potentiated by feedforward  
regulatory mechanisms involving Zscan4 and TAK1

Sun, Y. et al

File Name: Supplementary Information

Description: Supplementary Figures and Supplementary Tables

\*\*\*\*\*

Supplementary Figures: Supplementary Figure 1-13

Supplementary Tables: Supplementary Table 1-5

**a**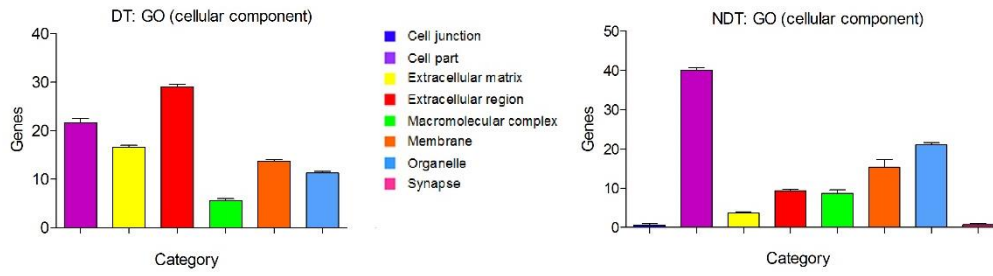**b**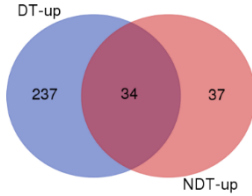**c**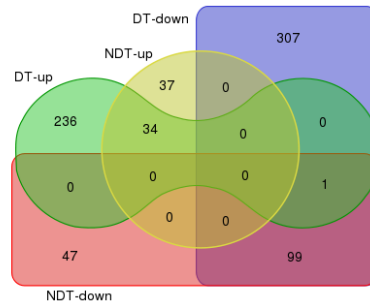**d**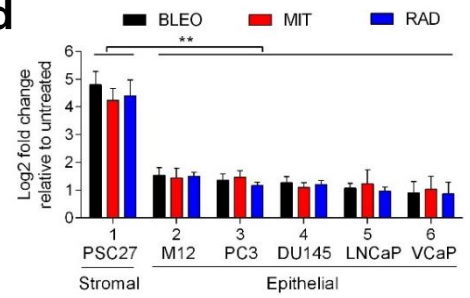**e**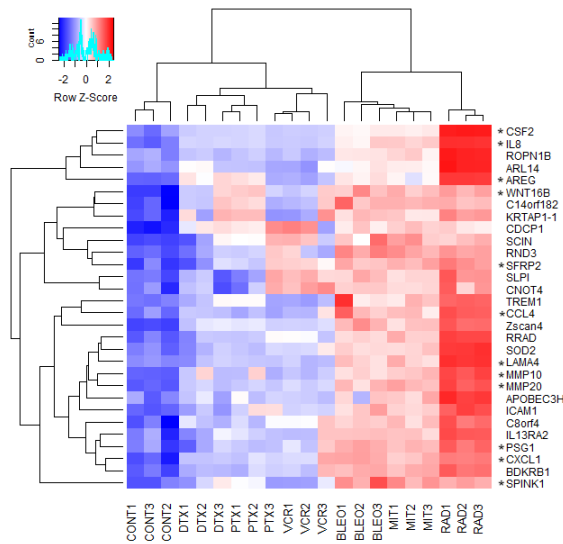**f**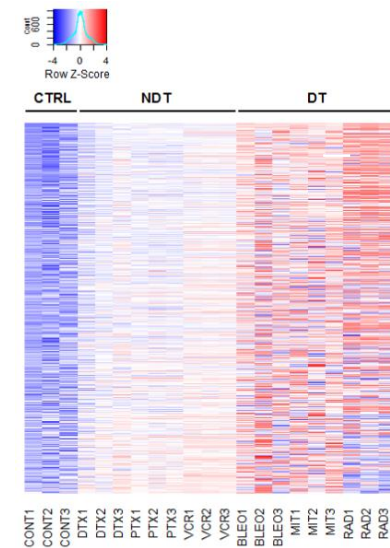**g**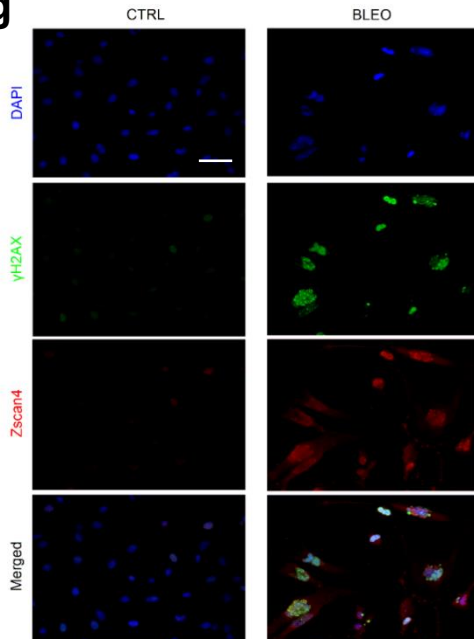**h**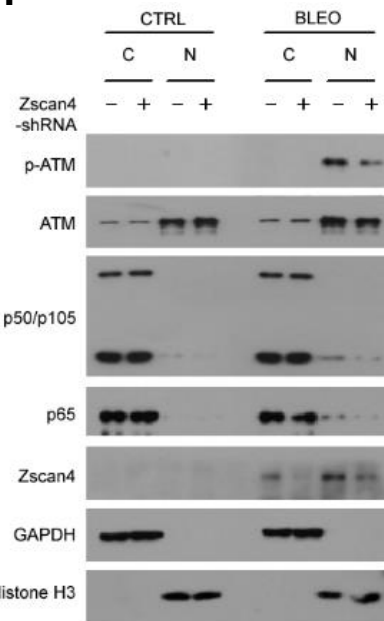**i**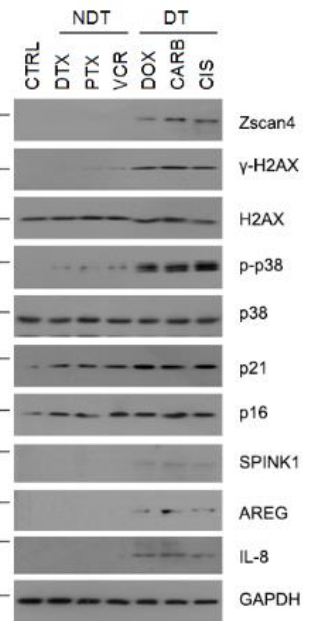

**Supplementary Figure 1. Gene expression profiling of human stromal cells treated by chemotherapeutic agents and subcellular localization of Zscan4.** (a) Cellular component depiction for upregulated genes (top 100 per agent group) of PSC27 cells treated by the DT and NDT agents, respectively. Color annotations are shown aside the bar plots. (b) Venn diagram displaying genes upregulated by the DT and NDT agents, respectively. There were 271 unique genes with an upregulation fold change > 3 for the DT group, whereas 71 for the NDT group. (c) Venn diagram presenting both upregulated and downregulated genes by these two agent groups. In addition to the upregulated genes selected above, there were 407 unique genes with a downregulation fold change > 3 for the DT group, whereas 147 genes for the NDT group. (d) Quantitative RT-PCR measurement of Zscan4 induction in prostate stromal cells and cancer epithelial cells, respectively, in response to treatment by bleomycin (50 µg/ml), mitoxantrone (500 nM) or radiation (10 Gy). Data normalized to the untreated sample per line, and analyzed using two-way ANOVA. (e) Heatmap depiction of top 30 human genes that are significantly upregulated in stromal cells after treatment by DT agents, with expression values in stromal cells treated by NDT agents shown side-by-side for parallel comparison. Hierarchical clustering was performed for both treatments and genes. Red arrow, Zscan4. Asterisks, genes encoding soluble factors. (f) Genome-wide profiling of human gene expression, by comparing the first 3107 genes upregulated by DT agents (fold change > 1) versus NDT agents. Hierarchical clustering was waived to allow for condensed heatmap presentation. (g) PSC27 cells were subject to bleomycin treatment (50 µg/ml). Cells were fixed 7 days post-treatment and analyzed with immunofluorescence microscopy (γ-H2AX and Zscan4 co-stained). Images are representative of 3 independent experiments, scale bar, 20

µm. (h) Immunoblot analysis of Zscan4 expression and localization in PSC27 cells 7 days after bleomycin treatment. Upon separate preparation of cytoplasmic and nuclear proteins, ATM activation, NF-κB complex subunits (p50, p65) nuclear translocation and Zscan4 expression were assessed simultaneously. GAPDH and Histone H3, loading controls for cytoplasmic and nuclear samples, respectively. (i) Expression profiling of proteins including Zscan4, H2AX, p38, p16, p21 and a subset of hallmark SASP factors in human breast stromal cell line HBF1203 by immunoblots. Cells were treated by a group of NDT and DT agents (DTX, docetaxel; PTX, paclitaxel; VCR, vincristine; DOX, doxorubicin; CARB, carboplatin; CIS, cisplatin), with lysates collected 7 d after drug treatment. Unless noted, data in bar plots are shown as mean ± SD and representative of 3 biological replicates. \*  $P < 0.05$ , \*\*  $P < 0.01$ , ^  $P > 0.05$ .

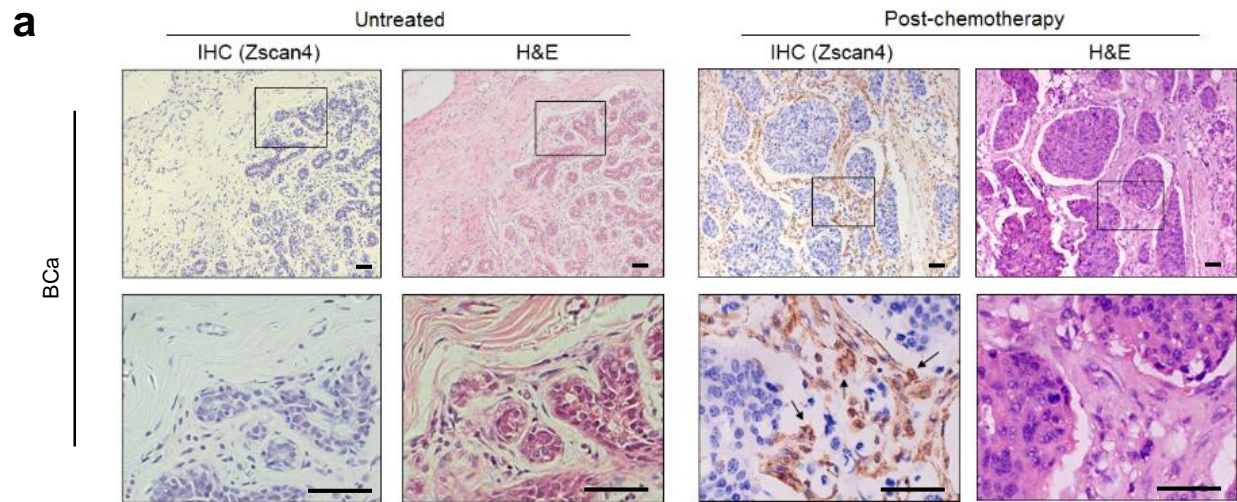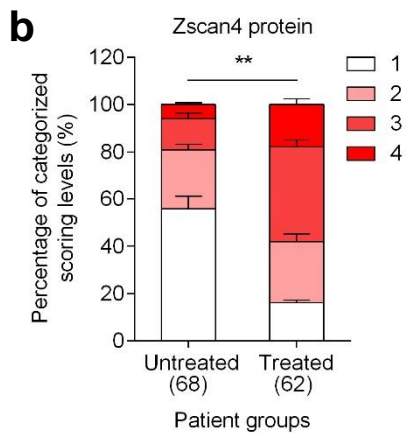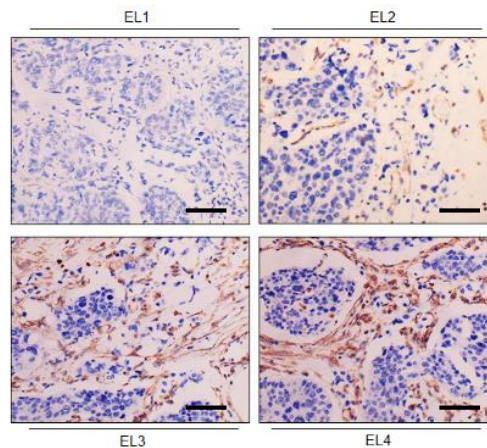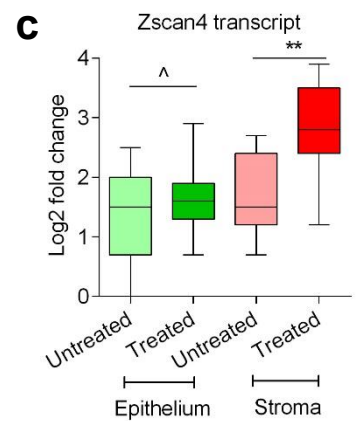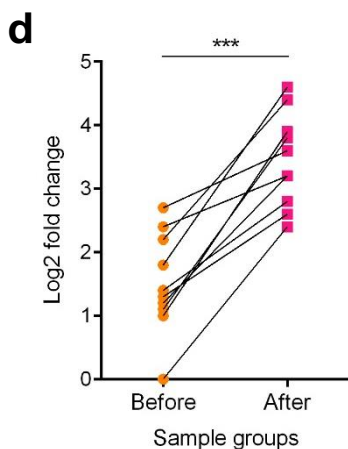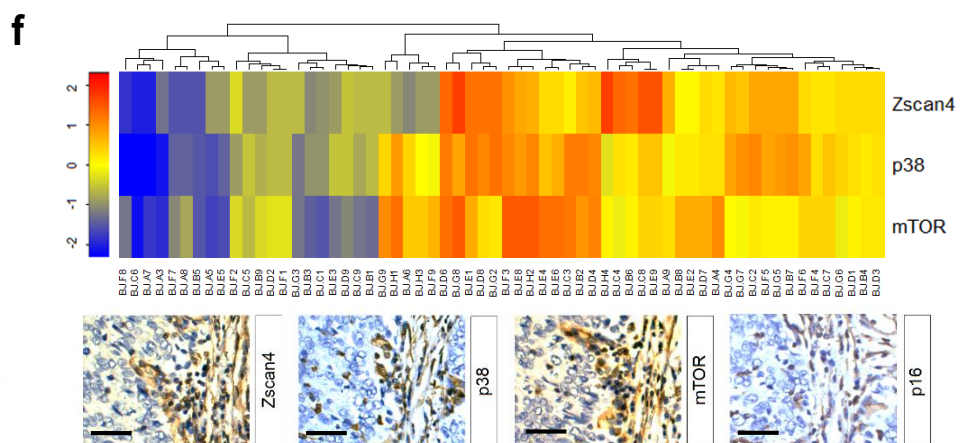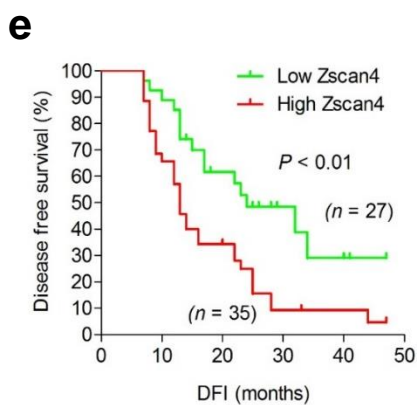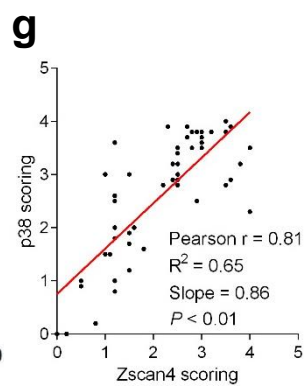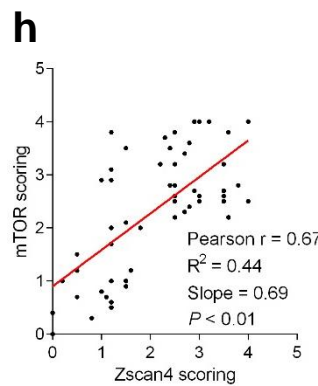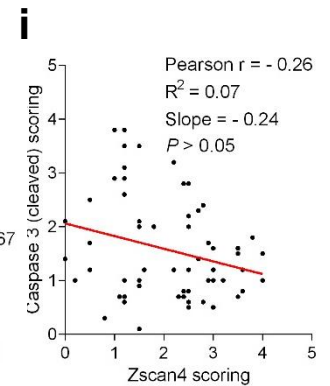

**Supplementary Figure 2. Zscan4 is expressed in the stroma of human breast tumors after chemotherapy, and correlates with poor survival of patients. (a)**

Immunohistochemistry (IHC) assessment of Zscan4 protein in primary tumors of breast cancer (BCa) patients. Samples were from patients without chemotherapy experience (untreated) or with the experience of receiving genotoxic chemotherapy (post-chemotherapy). Tissues were subject to Zscan4-specific IHC and general hematoxylin-eosin (HE) staining. Arrows, intensive nuclear signals of Zscan4 in the stroma. Scale bars, 50  $\mu$ m. Doxorubicin was used a chemotherapeutic agent for this treated patient. **(b)** Pathological appraisal of stromal Zscan4 expression in BCa patient tumors. Patients were individually assigned into 4 categories per IHC staining intensity. 1, negative; 2, weak; 3, moderate; 4, strong expression. Left, statistical comparison of the percentage of each category. Right, representative images of each category regarding Zscan4 signals. ES, expression level. Scale bars, 50  $\mu$ m.  $P < 0.05$  by two-way ANOVA. **(c)** Quantitative RT-PCR analysis of Zscan4 transcript expression with total RNAs collected upon laser capture microdissection of BCa patient tumor and stroma, respectively. Signals were normalized to the lowest value in the untreated epithelium group. Comparison was performed between treated and untreated samples per cell group. Data analyzed using Student's *t*-test. **(d)** Comparative analysis of Zscan4 expression at transcription level between stromal cells collected before and after chemotherapy. Each dot represents an individual patient, with the data of "before" and "after" connected to allow direct assessment of Zscan4 induction in the same patient. Data analyzed using Student's *t*-test. **(e)** Kaplan-Meier analysis of the disease free survival (DFS) duration of BCa patients stratified according to Zscan4 expression (low, average score  $< 2$ , green line,  $n = 27$ ; high, average score  $\geq 2$ , red line,  $n =$

35). DFS represents the length (months) of period calculated from the date of BCa diagnosis to the point of first time disease relapse. Survival curves calculated according to the Kaplan–Meier method, with data compared with log-rank (Mantel-Cox) test. **(f)** Pathological association between Zscan4, p38 and mTOR in the stroma of BCa patients post-treatment. Scores were from the assessment of molecule-specific IHC staining, with expression levels colored to reflect low (blue) via modest (yellow) to high (red) protein abundance. Columns represent individual patients, rows individual molecules. Totally 62 patients treated by chemotherapy were analyzed, with scores of each patient averaged from 3 independent pathological readings per tumor. Bottom, representative IHC images of Zscan4, p38 (T-180) and mTOR (S-2448), respectively. Images are representative of tissue sections from 10 randomly selected patients who displayed relatively high Zscan4 expression.  $P < 0.0001$  for score-score matching by two-way ANOVA. **(g)** Overall correlation between Zscan4 and p38 scores (Pearson analysis,  $r = 0.81$ ;  $P < 0.0001$ ) in the 62 tumors with matching protein expression data. Data analyzed using Student's  $t$ -test. **(h)** Overall correlation between Zscan4 and mTOR scores (Pearson analysis,  $r = 0.67$ ;  $P < 0.0001$ ) in the same group of tumors assessed in **(f)**. Data analyzed using Student's  $t$ -test. **(i)** Statistical correlation between Zscan4 and caspase 3 (cleaved) scores (Pearson analysis,  $r = -0.26$ ;  $P > 0.05$ ) in the same group of tumours described in **(f)**. Data analyzed using Student's  $t$ -test. Data in bar plots are shown as mean  $\pm$  SD and representative of 3 biological replicates. \*  $P < 0.05$ , \*\*  $P < 0.01$ , \*\*\*  $P < 0.001$ , ^  $P > 0.05$ .



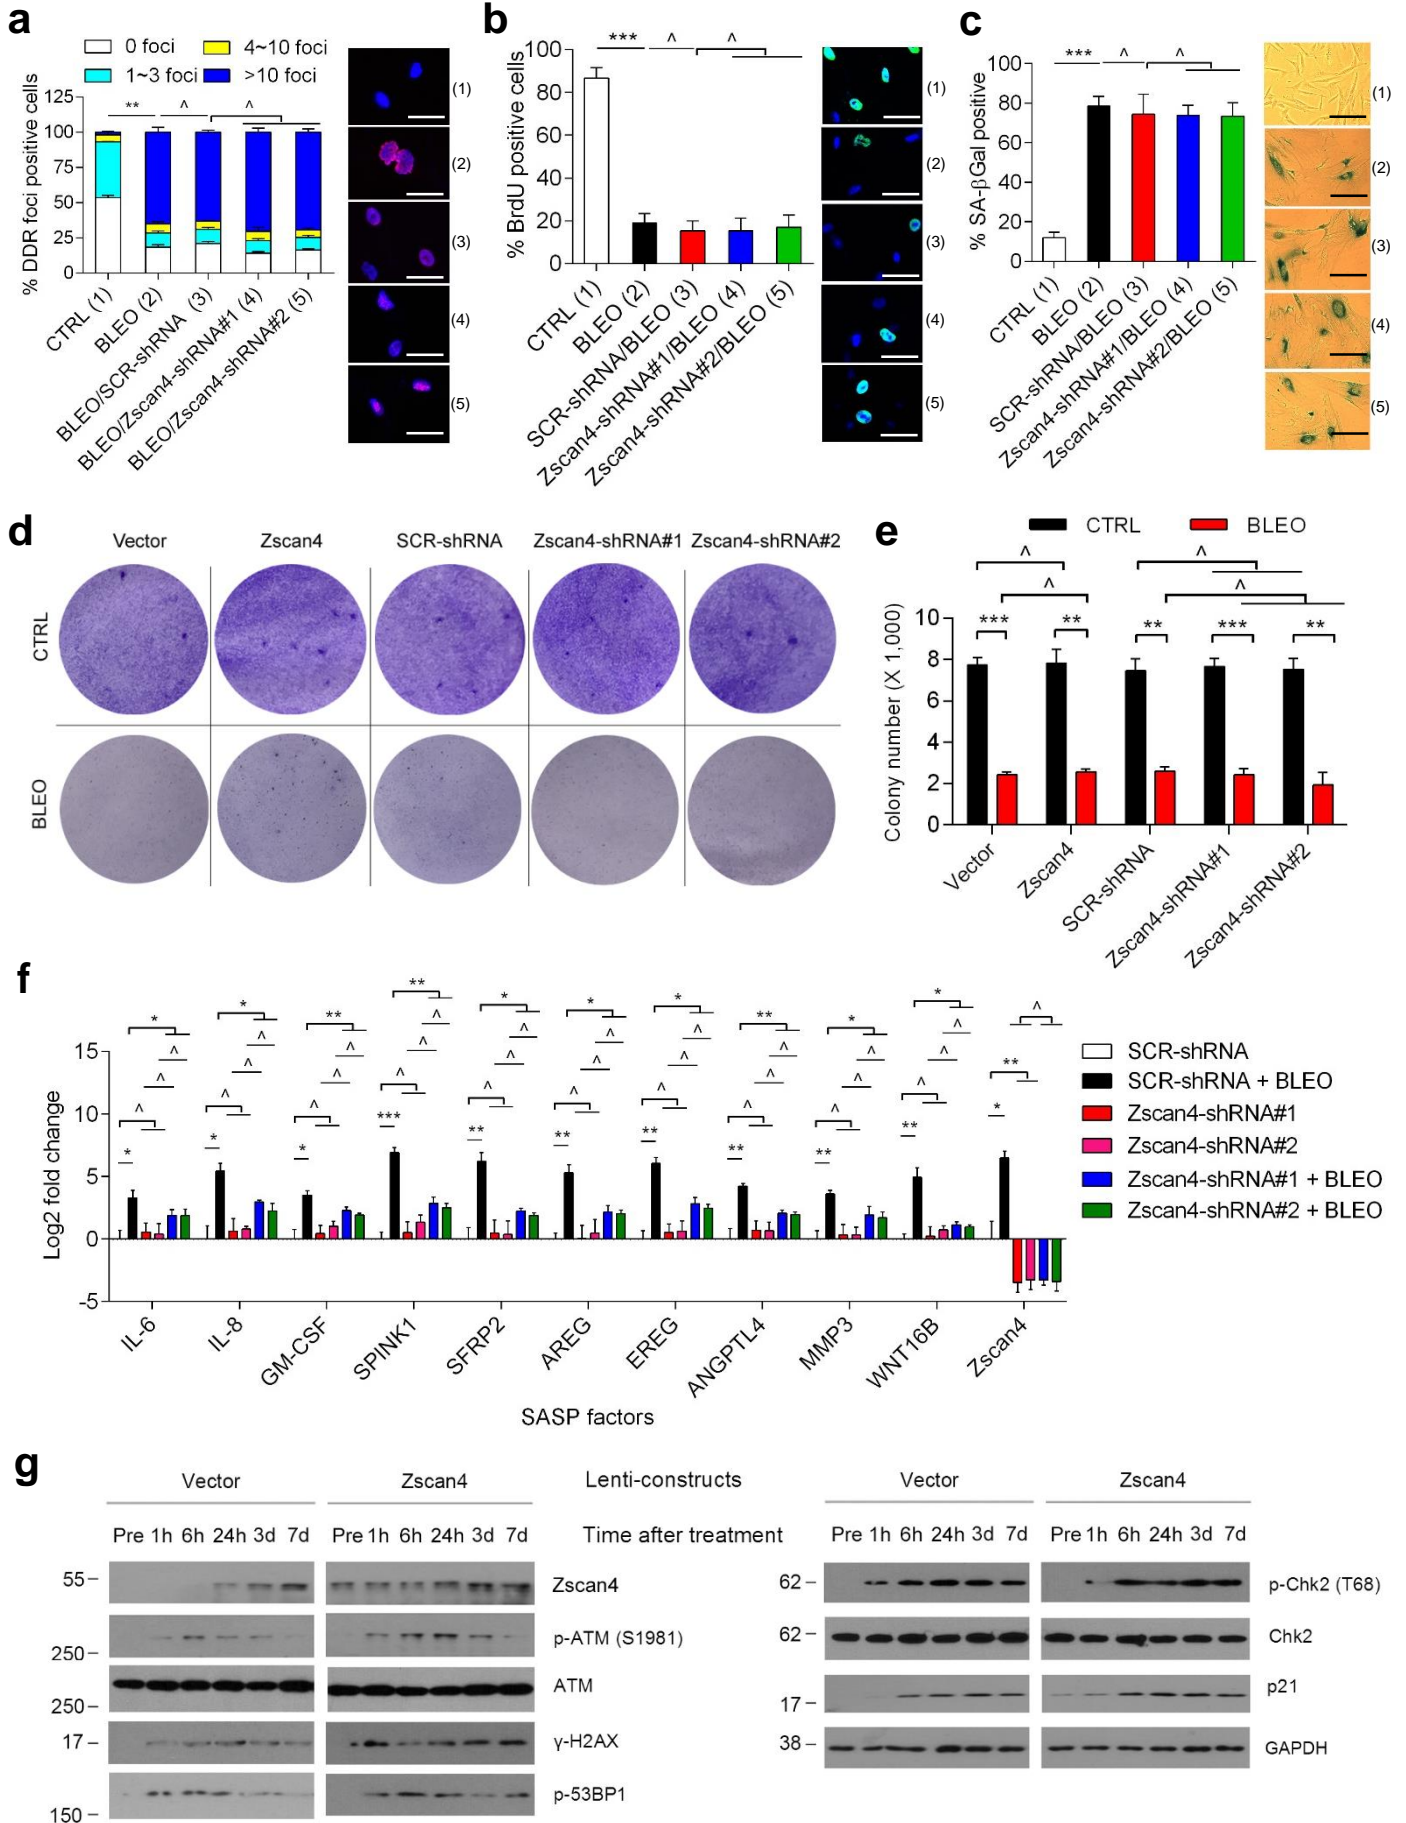



**Supplementary Figure 3. Influence of Zscan4 knockdown on DNA damage response (DDR), DNA synthesis, cellular senescence, colony formation, and expression of canonical SASP factors, and effect of Zscan4 overexpression on DDR signaling. (a)**

Statistics of DDR foci (DDF) in PSC27 stable sublines established via lentiviral infection with constructs that encode scramble shRNA (SCR-shRNA) or gene-specific shRNA for Zscan4 (Zscan4-shRNA#1 or Zscan4-shRNA#2), then subject to bleomycin treatment (50  $\mu$ g/ml). The number of DDR foci per cell was counted and calculated into percentage of overall cell populations examined. Right, representative images (red,  $\gamma$ H2AX; blue, DAPI), with the numeric numbers corresponding to those provided in the left graph. At least 200 cells counted per sample. Scale bars, 15  $\mu$ m. Data analyzed using two-way ANOVA. **(b)** DNA synthesis assessment by BrdU incorporation with the number of BrdU-positive cells counted and calculated into percentage. Right, representative images (green, BrdU; blue, DAPI), with the numeric numbers corresponding to those provided in the left graph. At least 200 cells counted per sample. Scale bars, 15  $\mu$ m. Data analyzed using Student's *t*-test. **(c)** Cellular senescence evaluation by SA- $\beta$ -Gal staining of above cell sublines, with the percentage of positively stained cells shown in percentage. Right, representative images. At least 200 cells counted per sample. Scale bars, 20  $\mu$ m. Data analyzed using Student's *t*-test. **(d)** Representative images of *in vitro* clonogenic assay in culture dishes performed with cell sublines tested above, either untreated or treated with bleomycin. **(e)** Statistics for cell-derived colonies grown in each of Zscan4-overexpression or Zscan4-knockdown groups. The colony numbers were counted and graphed. **(f)** PSC27 stable sublines established via lentiviral infection with scramble RNA (SCR-shRNA) or Zscan4 shRNAs (Zscan4-shRNA#1 or #2) construct, were treated by

bleomycin. Seven days post-treatment, cells were lysed for qRT-PCR analysis of SASP factor expression, with values normalized to SCR-shRNA per factor. Data analyzed using Student's *t*-test. **(g)** Immunoblot examination of Zscan4 and a subset of typical DDR factors (ATM, H2AX, 53BP1, Chk2) and p21 in PSC27 cells infected with lentivirus carrying either an empty vector or the Zscan4 construct. Cells were treated by bleomycin, with lysates collected at the individual time points after genotoxic treatment. GAPDH, loading control. Data in bar graphs are shown as mean  $\pm$  SD and representative of 3 biological replicates. \**P* < 0.05, \*\**P* < 0.01, \*\*\**P* < 0.001, ^*P* > 0.05. Images are representative of 3 independent experiments. CTRL, control. BLEO, bleomycin.

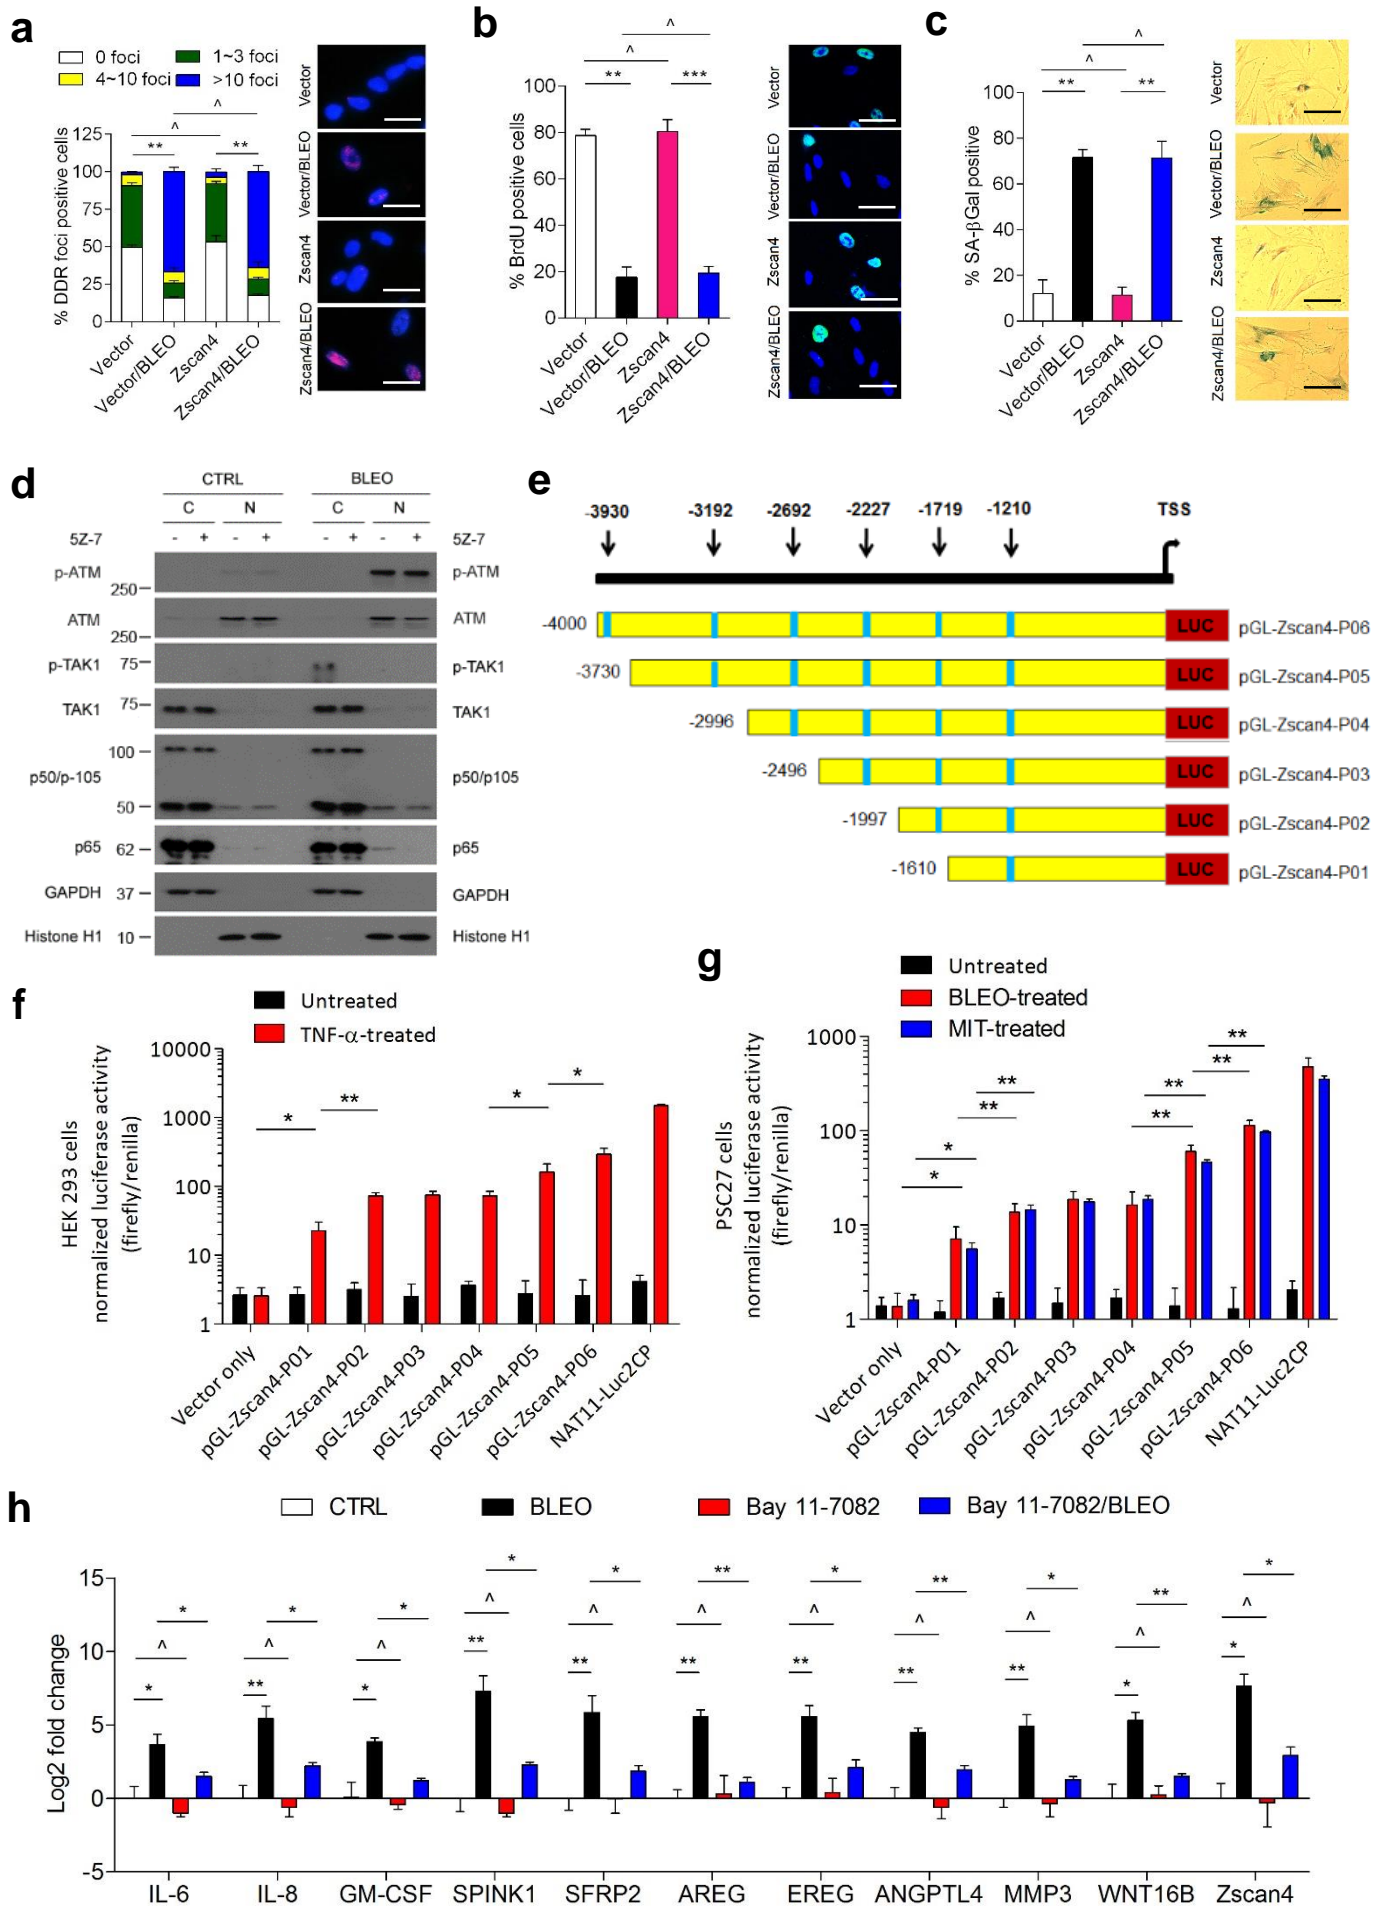

**Supplementary Figure 4. Influence of Zscan4 overexpression on breast stromal cell phenotypes and regulation of genotoxicity-induced Zscan4 expression by the NF- $\kappa$ B complex.** (a) Statistics of DDR foci in HBF1203 stable sublines established via lentiviral infection and treated by bleomycin (50  $\mu$ g/ml). The number of cells displaying each category of DDR foci was counted and converted into percentage per cell population. Right, representative images (red,  $\gamma$ H2AX; blue, DAPI). At least 200 cells counted per sample. Scale bars, 15  $\mu$ m. Data analyzed using two-way ANOVA. (b) DNA synthesis evaluation by BrdU incorporation of cell sublines assayed in (a), with BrdU-positive cells calculated in percentage. Right, representative images (green, BrdU; blue, DAPI). At least 200 cells counted per sample. Scale bars, 15  $\mu$ m. (c) Cellular senescence assessment by SA- $\beta$ -Gal staining of above cell sublines, with positively stained cells shown in percentage. Right, representative images. At least 200 cells counted per sample. Scale bars, 20  $\mu$ m. (d) Cytoplasmic and nuclear protein lysates prepared from control and doxorubicin-treated HBF1203 cells were assessed for TAK1 activation and NF- $\kappa$ B nuclear translocation. Cells treated with or without 5Z-7 to suppress TAK1 were analyzed in parallel. GAPDH and Histone H1, cytoplasmic and nuclear loading controls, respectively. (e) Schematic representation of putative NF- $\kappa$ B binding sites in the proximal region of human Zscan4 promoter. A set of reporter constructs was generated by sequential cloning of the promoter fragments into a pGL4.22 vector that allows expression of firefly luciferase driven by the exogenous promoters (pGL-Zscan4-P01 to P06). Arrow heads on the top denotes the core site of each putative NF- $\kappa$ B binding motif. Numeric numbers at the left marks the length of each segmental promoter clone. TSS. Transcription start site. (f) Measurement of luciferase activities upon exposure of HEK 293 cells pre-transfected with

Zscan4 promoter expression constructs to TNF- $\alpha$  at 20 ng/ml in culture. The empty vector was used as a negative control, while the construct NAT11-Luc2CP encoding multiple copies of typical NF- $\kappa$ B binding sequences and an optimized IL-2 minimal promoter served as a positive control. **(g)** Luciferase activity assay with PSC27 cells that were transfected with each of the constructs used in **(f)** prior to treatment by 50  $\mu$ g/ml bleomycin (BLEO) or 1  $\mu$ M mitoxantrone (MIT). **(h)** Expression analysis of canonical SASP factors upon treatment by 50  $\mu$ g/ml BLEO, 5  $\mu$ M Bay 11-7082, or both. Cells were lysed 7 days post treatment. Signals were normalized to untreated (CTRL) samples per factor set. Data in bar plots are shown as mean  $\pm$  SD and representative of 3 biological replicates. \* $P$  < 0.05, \*\* $P$  < 0.01, ^ $P$  > 0.05. Data in **b, c, f, g** and **h** were analyzed using Student's  $t$ -test.

**a**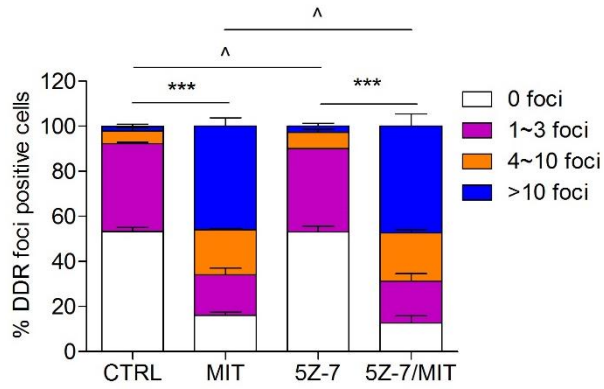**b**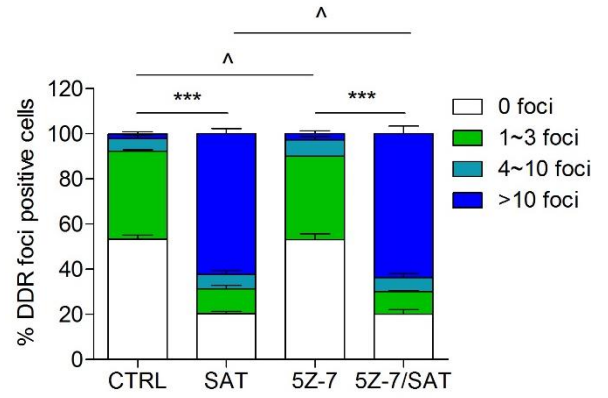**c**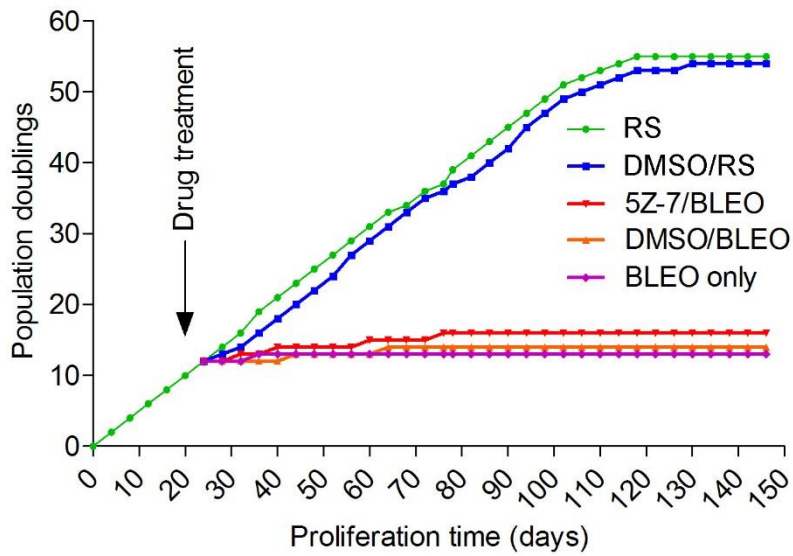**d**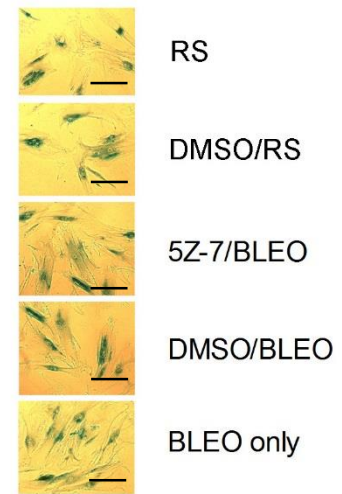



**Supplementary Figure 5. TAK1 inhibition does not change the DNA damage extent and proliferative potential of stromal cells exposed to genotoxicity.** (a) Statistics of DDF in PSC27 cells upon treatment by mitoxantrone (MIT, 1  $\mu$ M), in the presence or absence of the TAK1 inhibitor 5Z-7-Oxozeaenol (5Z-7, 500 nM). (b) Statistics of DDR foci for stromal cells upon treatment by satraplatin (SAT, 10  $\mu$ M), in the presence or absence of 5Z-7. (c) Population doubling-based proliferative assay of stromal cells under different treatment conditions. RS, replicative senescence. Proliferation time was counted in days. (d) Representative images of SA- $\beta$ -Gal staining of cells as assayed in (c). Data in bar plots are shown as mean  $\pm$  SD. All data are representative of 3 biological replicates. \* $P < 0.05$ , \*\*\* $P < 0.001$ , ^ $P > 0.05$ . Data in **a** and **b** were analyzed using two-way ANOVA.

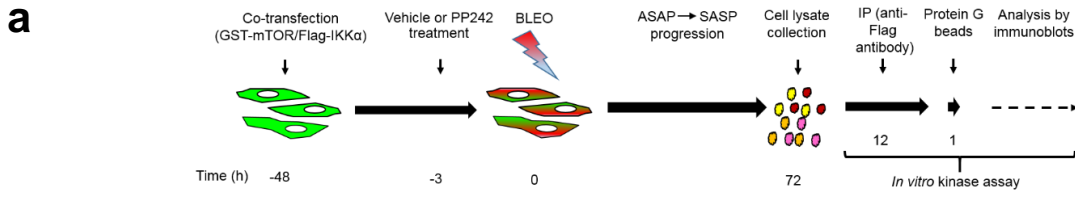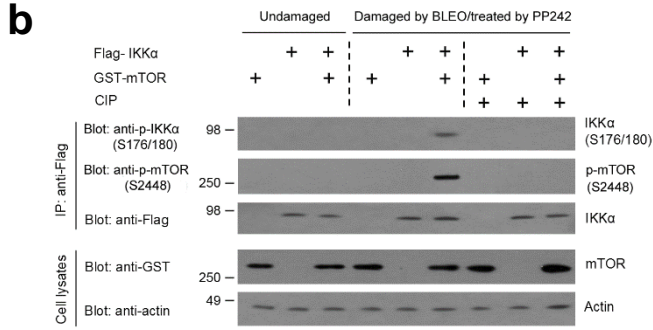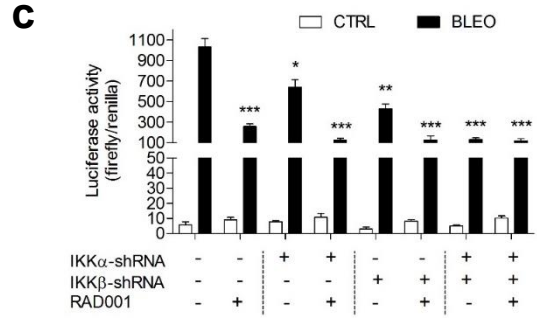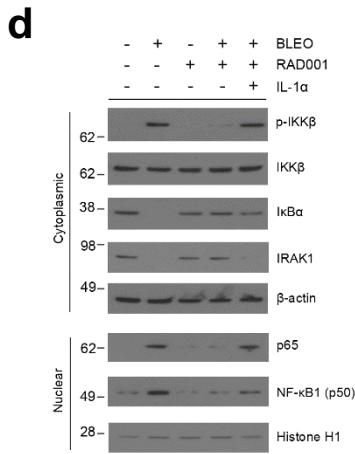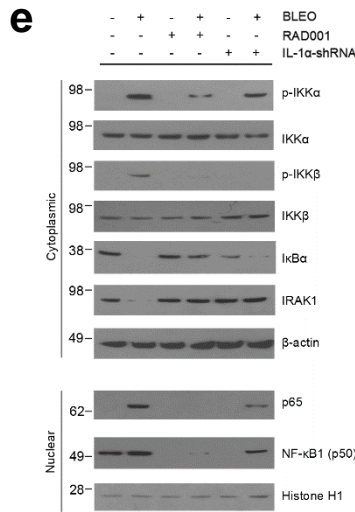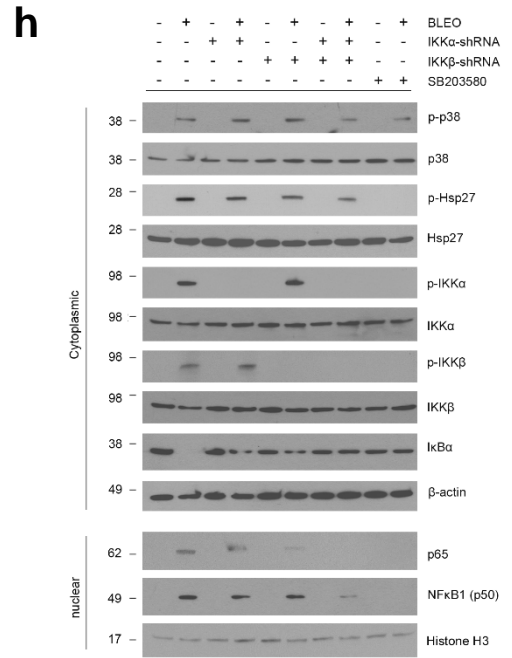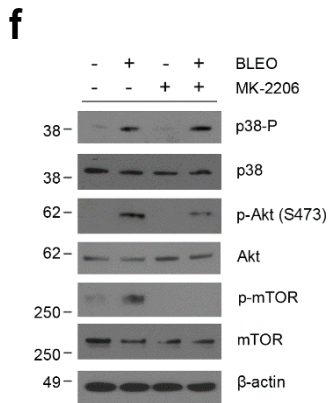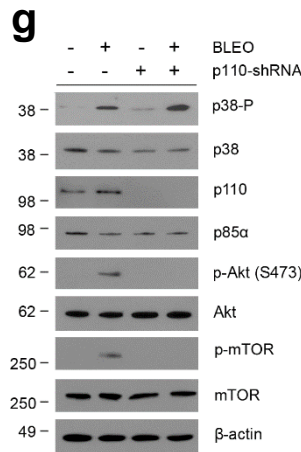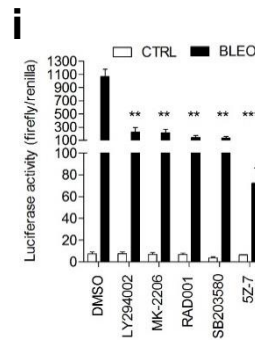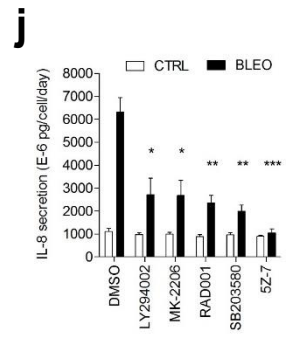

**Supplementary Figure 6. Interaction of mTOR with IKK complex, IL-1 $\alpha$ /NF- $\kappa$ B positive feedback loop and p38/PI3K/Akt pathways are implicated in cytoplasmic signaling to support the chronic SASP development.** (a) Illustrative workflow of cell treatments in culture and subsequent co-IP experiments for *in vitro* kinase assay. (b) Identification of IKK $\alpha$  as a substrate of mTOR-mediated phosphorylation through *in vitro* kinase assay. PSC27 cells were transfected with a Flag-IKK $\alpha$  and/or GST-mTOR construct before genotoxic damage, and lysates were processed by IP followed by immunoblot analysis. CIP, calf intestinal phosphatase. Actin, loading control. (c) Reporter assay of NF- $\kappa$ B activity in stromal cells upon genetic manipulation by shRNA-mediated knockdown of IKK subunits or pharmacological treatment with RAD001 followed by genotoxic stress. (d) Exogenous IL-1 $\alpha$  (20 pg/ml) rescues the RAD001-suppressed SASP under genotoxic conditions. After exposure of PSC27 cells to bleomycin, phosphorylation of IKK $\beta$ , cytoplasmic amounts of IKB $\alpha$  and IRAK1, and nuclear translocation of NK- $\kappa$ B subunits (p65 and p50) were determined by immunoblots. (e) Elimination of IL-1 $\alpha$  from stromal cells does not abrogate SASP induced by DNA damage. In contrast to the conditions of (d), IL-1 $\alpha$  was eliminated from PSC27 cells by shRNA prior to bleomycin treatment, with lysates analyzed for phosphorylation of IKK $\alpha$  and IKK $\beta$ , cytoplasmic preservation of IKB $\alpha$  and IRAK1, and NK- $\kappa$ B nuclear transportation. (f) Chemical treatment with MK-2206 (100 nM), a pan-Akt inhibitor, abrogated mTOR activation induced by genotoxic stress to stromal cells. Phosphorylation of p38, Akt and mTOR was examined by immunoblots. (g) Genetic elimination of p110, the catalytic subunit of PI3K by shRNA, dampened Akt/mTOR signaling in DNA-damaged stromal cells. Phosphorylation of p38, Akt and mTOR was examined. (h) Functional analysis of p38 in DNA-damaged stromal cells by examining its

correlation with NF- $\kappa$ B activation. PSC27 cells were either transduced with shRNA constructs against IKK $\alpha$ , IKK $\beta$ , or treated with SB203580 before DNA damage. Antibodies to phosphorylated and total p38, Hsp27, IKK $\alpha$  and IKK $\beta$ , total IKB $\alpha$ , and nuclear contents of the NF- $\kappa$ B subunits were used for immunoblots. (i) Reporter assay of NF- $\kappa$ B activity. The PI3K inhibitor LY294002 (1  $\mu$ M), Akt inhibitor MK-2206 (100 nM), mTOR inhibitor RAD001 (50 nM), p38 inhibitor SB203580 (10  $\mu$ M) and TAK1 inhibitor 5Z-7 (500 nM) are used to treat PSC27 cells prior to DNA damage. Luciferase signals were calculated by normalizing the readings of firefly/renilla. Statistical significance was relative to the value of undamaged cells. (j) Measurement of IL-8 production in the CM of stromal cells by ELISA assay. Cells were pre-treated with the small molecule inhibitors as in (i) before exposure to bleomycin in culture. Seven days post genotoxic stress, IL-8 concentration was measured in the unit of 10<sup>-6</sup> pg/cell/day. Statistical significance relative to the control group. 5Z-7, 5Z-7-oxozeaenol. Data in bar plots are shown as mean  $\pm$  SD. All data are representative of 3 biological replicates. \* $P$  < 0.05, \*\* $P$  < 0.01, \*\*\* $P$  < 0.001. Data in **c**, **i** and **j** were analyzed using Student's  $t$ -test.

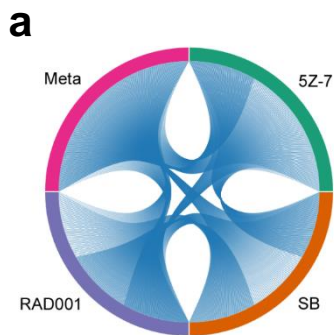

**b**

| Enrichment Analysis (KEGG)              |            |      |
|-----------------------------------------|------------|------|
| Name                                    | P-value    | Hits |
| Cytokine-cytokine receptor interaction  | 0.00000848 | 18   |
| Chemokine signaling pathway             | 0.00874    | 10   |
| ECM-receptor interaction                | 0.0104     | 6    |
| Neuroactive ligand-receptor interaction | 0.00272    | 4    |
| Galactose metabolism                    | 0.0191     | 3    |
| Tryptophan metabolism                   | 0.0547     | 3    |
| Legionellosis                           | 0.0582     | 3    |
| Staphylococcus aureus infection         | 0.0582     | 3    |
| Systemic lupus erythematosus            | 0.0847     | 2    |
| Viral myocarditis                       | 0.113      | 2    |

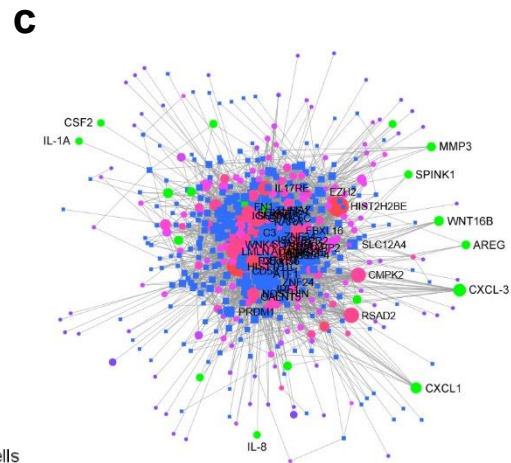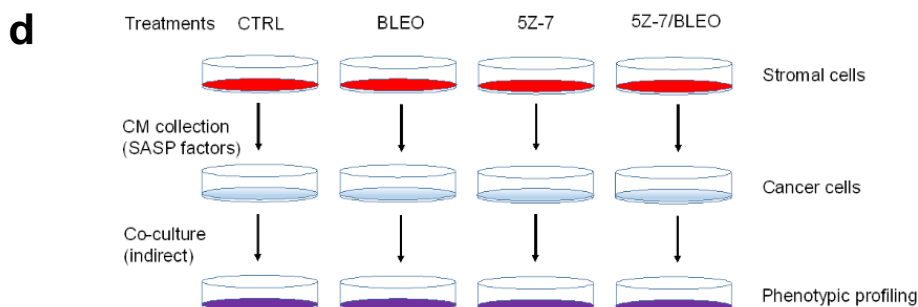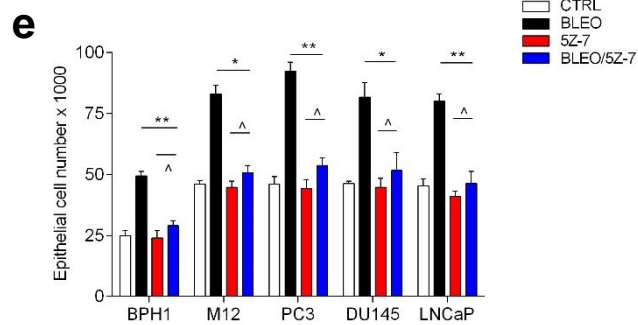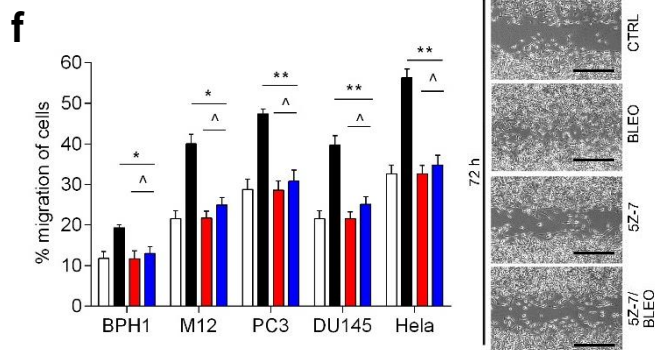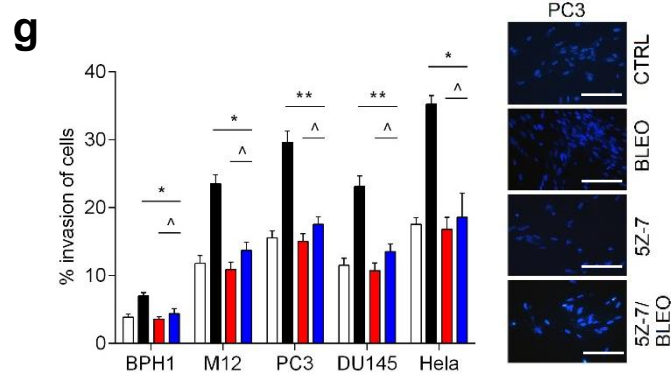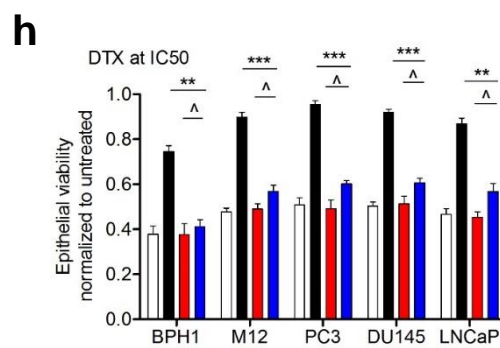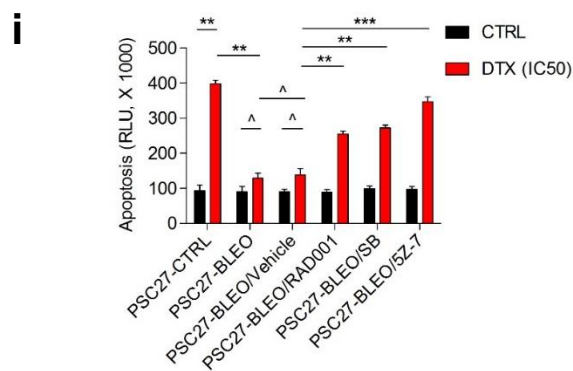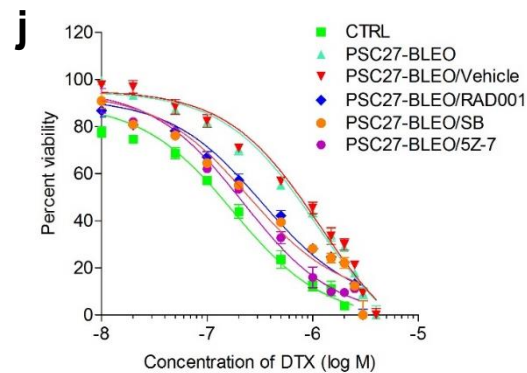

**Supplementary Figure 7. Comparative transcriptomic profiling of SASP-inhibited stromal cells and consequential influence on malignant phenotypes of cancer cells. (a)**

Chord diagram delineates the correlation of significantly downregulated genes (fold change > 2) by 5Z-7, SB or RAD001 in bleomycin-treated stromal cells. Meta, a meta-dataset combined from the raw datasets generated individually by 3 candidate SASP inhibitors for increased statistical power and cross study validation. (b) Summary of enrichment analysis by the KEGG pathway evaluation for top 809 genes whose expression was downregulated (fold change > 2) by 5Z-7 in bleomycin-treated cells. An IMEx interactome database was selected for protein-protein interaction assessment. (c) Construction of a nodal network from the top 809 genes described above. Green dots, canonical SASP factors. Connecting lines, putative protein-protein interactions. Representative SASP factors downregulated by 5Z-7 are shown to highlight the effect of TAK1 inhibition. Nodes, 580; edges, 4046; seeds, 252. (d) Workflow of indirect co-culture of stromal cells with cancer epithelial cells. Soluble factor-containing CM from stromal cells were collected after *in vitro* drug treatment and applied to cancer cells to for phenotype analysis. (e) Proliferation assay of an immortalized but benign epithelial cell line BPH1 and malignant cell lines M12, PC3, DU145 and LNCaP (all of prostate origin). Cells were cultured for 3 days with the CM from PSC27 cells treated in several conditions as indicated in (a). (f) Migration assay of cancer cells cultured for 3 days with different types of CM from stromal cells. BPH1, M12, PC3 and LNCaP lines were examined in parallel with HeLa line, which served as a positive control. Right, representative images of PC3 cell migration measured at 0 h and 72 h, respectively. Scale bars, 100  $\mu$ m. (g) Invasiveness assay of cancer cell lines with collagen-based transwells in culture condition. Right, representative images of



PC3 cell invasion across the transwell membrane, followed by DAPI staining to locate invading cells. Scale bars, 50  $\mu\text{m}$ . **(h)** Chemoresistance assay of prostate epithelial cells cultured with various types of CM from stromal cells. DTX was applied at the concentration of IC50 value pre-determined per cell line. DTX, docetaxel. **(i)** Apoptotic assay for combined activities of caspase 3/7 determined 24 h after exposure of PC3 cells to CM of stromal cells while being treated by DTX. RLU, relative luciferase unit. **(j)** Dose response curve (non-linear regression fit) by measuring the viability of PC3 cells across a range of MIT concentrations ( $10^{-8}$  to  $10^{-5}$  M). Blue, orange and pink lines represent PC3 response to CM of PSC27 treated by bleomycin combined with RAD001, SB or 5Z-7, respectively. Data shown in bar graphs are mean  $\pm$  SD. All data are representative of 3 independent experiments. SB, SB203580. 5Z-7, 5Z-7-oxozeaenol. Data in **e, f, g, h** and **i** were analyzed using Student's *t*-test.

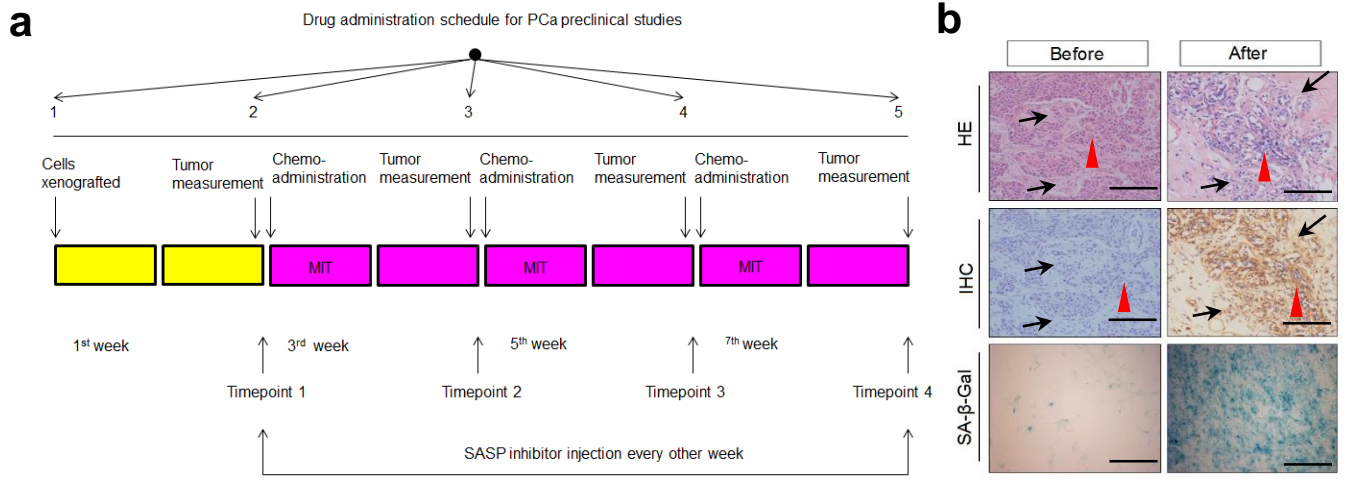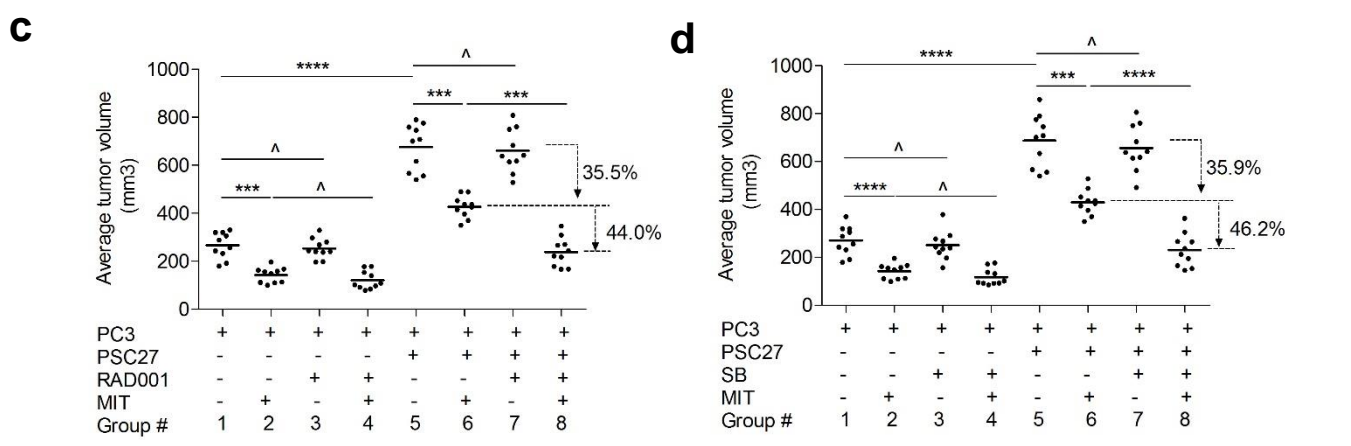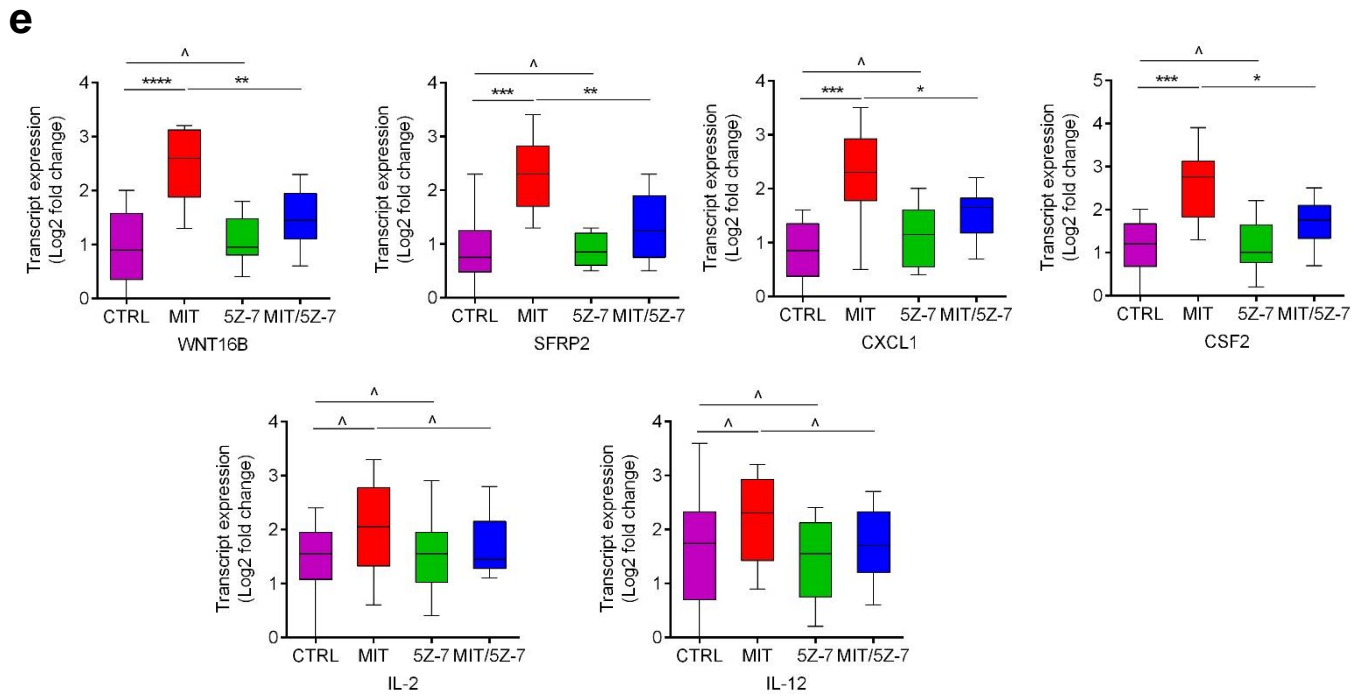

**Supplementary Figure 8. Preclinical schedule, treatment-induced cellular senescence, tumor regression by combinational administration and SASP factor expression in mice carrying prostate tumors.** (a) Drug administration scheme and tumor surveillance for preclinical investigation. PC3 cells along or admixed with PSC27 cells were inoculated subcutaneously to SCID mice 2 weeks prior to the scheduled MIT dosing, which was given on the first day of each week starting from the 3<sup>rd</sup> week, then given every other week with a total number of 3 doses. The SASP inhibitors (RAD001, SB203580 or 5Z-7) were given 12 h before each time of MIT delivery (totally 3 doses in the regimen). At the end of 8 weeks, mice were sacrificed with tumor volume measured, and histologically analyzed. (b) Representative images of *in vivo* cellular senescence caused by MIT-mediated chemotherapy. PC3/PSC27 tumors were acquired from experimental mice at the end of therapeutic regimen and subject to histological assessment. Images from staining of HE, IHC (anti-p16 as primary antibody) and SA- $\beta$ -gal staining are provided for both before- and after-treatment samples for comparison. Black arrows, stromal cells. Red arrowheads, cancer cells. Scale bars, 150  $\mu$ m. (c) Statistic quantification of endpoint volume of PC3 tumors subcutaneously implanted with or without stromal cells to SCID mice in the absence or presence of co-administered RAD001, followed by an 8-week chemotherapeutical regimen. (d) Similar quantification of endpoint volume of PC3 tumors described as above in (c), in the absence or presence of co-administered SB, in an 8-week treatment regimen. (e) Quantitative transcript expression analysis of representative canonical SASP factors expressed in stromal cells isolated from the tumours of SCID mice. Animals that had both stromal and cancer cells in the tumour foci were selected for examination. IL-2 and IL-12, factors not associated with the SASP but assayed as negative

controls. Data are shown as mean  $\pm$  SD and representative of 3 independent experiments. MIT, mitoxantrone. SB, SB203580. 5Z-7, 5Z-7-oxozeaenol. N = 10 per treatment arm. \* $P < 0.05$ , \*\* $P < 0.01$ , \*\*\* $P < 0.001$ , \*\*\*\* $P < 0.0001$ , ^ $P > 0.05$ . Data in **c**, **d** and **e** were analyzed using Student's *t*-test.

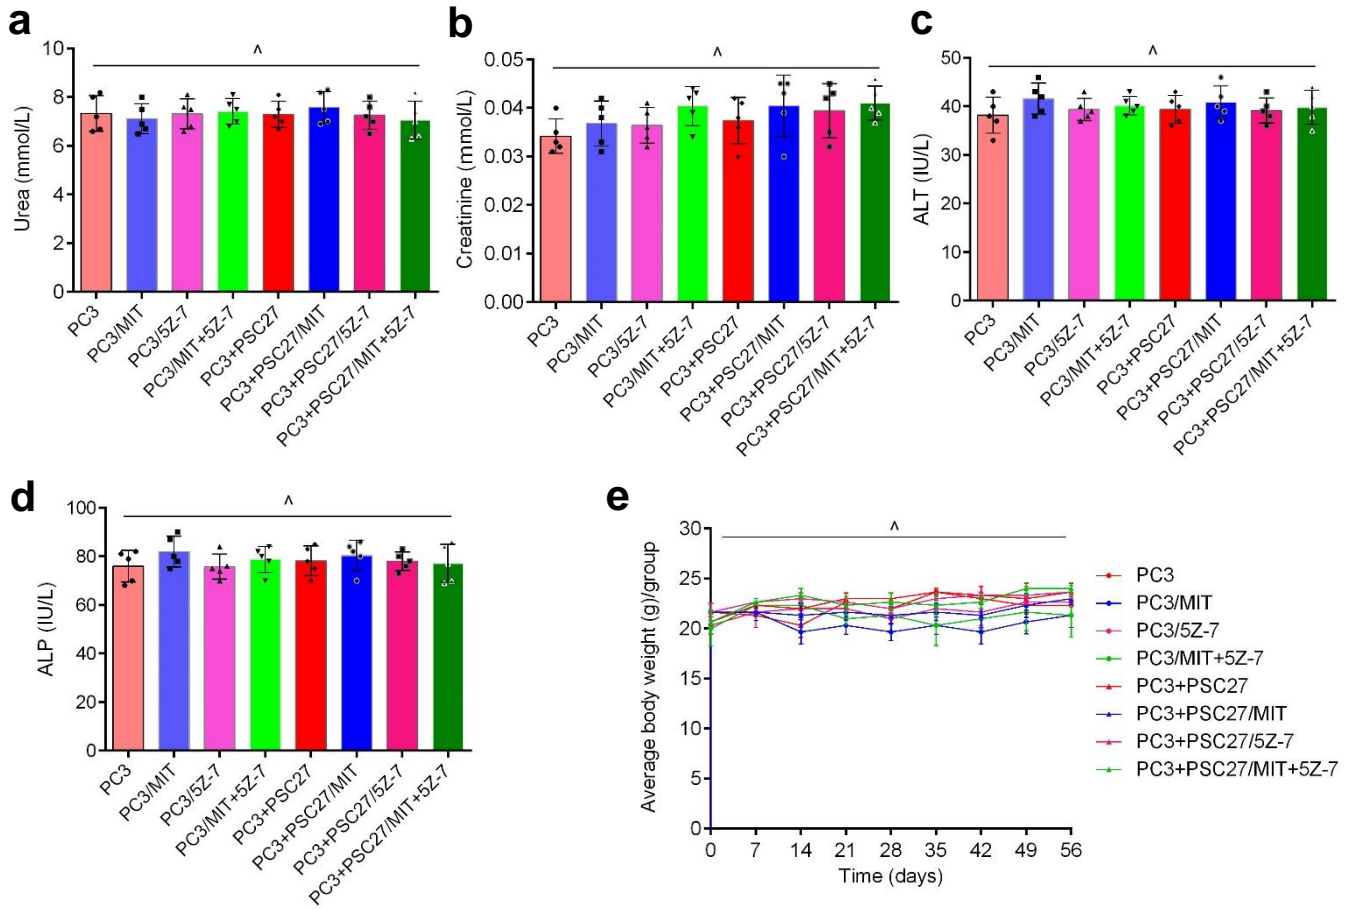

**Supplementary Figure 9. Appraisal of MIT and/or 5Z-7 treatment effects on mouse biochemistry and body weight.** (a) Serum urea measurement with terminal bleeds (cardiac punctures) taken at the end of therapeutic regimens. Serum creatinine assessment with samples collected in (a). (b) Serum alanine aminotransferase (ALT) evaluation with samples of (a). (c) Serum alkaline phosphatase (ALP) appraisal with samples of (a). (d) Mouse body weight determination performed on a weekly basis. Data are shown as mean  $\pm$  SD and representative of 3 independent experiments. MIT, mitoxantrone. 5Z-7, 5Z-7-oxozeaenol. N = 5 per treatment arm.  $^{\wedge}P > 0.05$ . Data in **a-e** were analyzed using Student's *t*-test.





**Supplementary Figure 10. Preclinical schedule, combinational administration,**

**biochemistry and body weight measurement of animals carrying breast tumors. (a)** Drug

administration scheme and tumor surveillance for preclinical investigation. MDA-MB-231 cells along or admixed with HBF1203 cells were inoculated subcutaneously to SCID mice 2 weeks prior to the scheduled DOX dosing, which was given on the first day of each week starting from the 3<sup>rd</sup> week, then given every other week with a total number of 3 doses. The SASP inhibitors (RAD001, SB203580 or 5Z-7) were given 12 h before each time of DOX delivery (totally 3 doses in the regimen). At the end of 8 weeks, mice were sacrificed with tumor volume measured, and histologically analyzed. **(b)** Statistic quantification of endpoint volume of breast tumors subcutaneously implanted with or without stromal cells to SCID mice in the absence or presence of co-administered RAD001, followed by an 8-week chemotherapeutical regimen. **(c)** Statistic quantification of endpoint volume of breast tumors subcutaneously implanted with or without stromal cells to SCID mice in the absence or presence of co-administered SB, followed by an 8-week chemotherapeutical regimen. **(d)** Statistic quantification of endpoint volume of breast tumors subcutaneously implanted with or without stromal cells to SCID mice in the absence or presence of co-administered 5Z-7, followed by an 8-week chemotherapeutical regimen. **(e)** Serum urea measurement with terminal bleeds (cardiac punctures) taken at the end of therapeutic regimens. **(f)** Serum creatinine assessment with samples collected in **(e)**. **(g)** Serum alanine aminotransferase (ALT) evaluation with samples of **(e)**. **(h)** Serum alkaline phosphatase (ALP) appraisal with samples of **(e)**. **(i)** Mouse body weight determination performed on a weekly basis. Data are shown as mean  $\pm$  SD and representative of 3 independent experiments. MDA, MDA-MB-231. DOX, doxorubicin. SB, SB203580. 5Z-7,

5Z-7-oxozeaenol. N = 10 per treatment arm for experiments b-d, and N = 5 per treatment arm for experiments e-i. \*\* $P < 0.01$ , \*\*\* $P < 0.001$ , \*\*\*\* $P < 0.0001$ ,  $^{\wedge}P > 0.05$ . Data in **b-i** were analyzed using Student's *t*-test.

**a**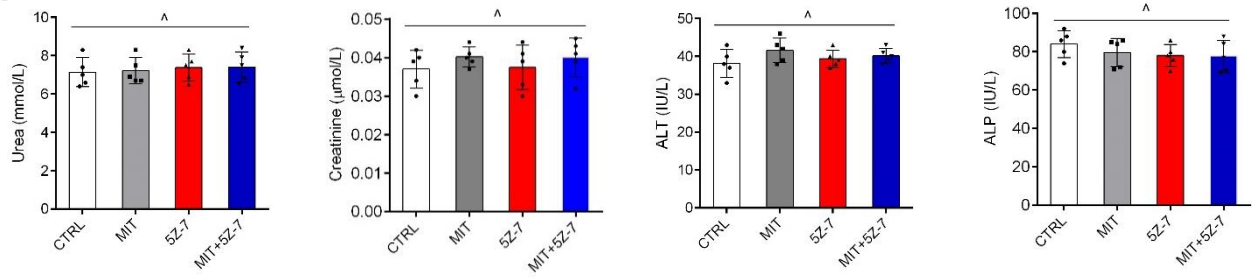**b**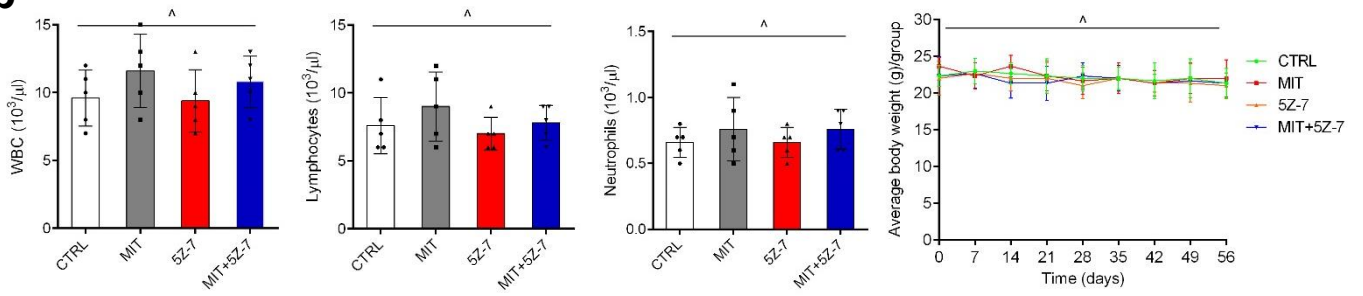**c**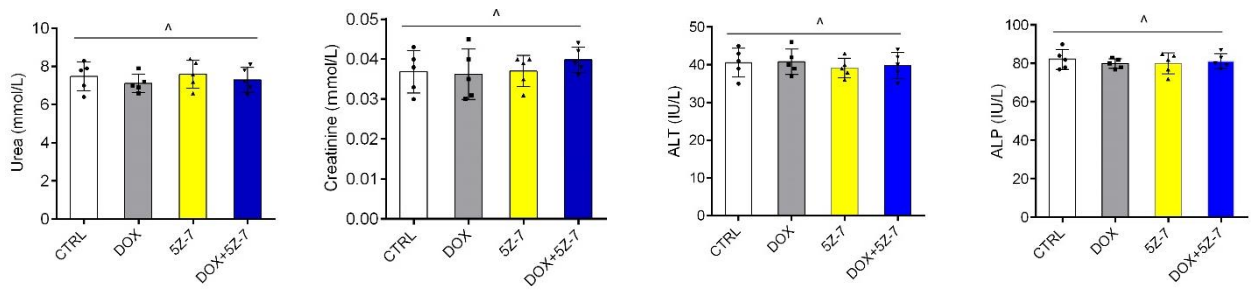**d**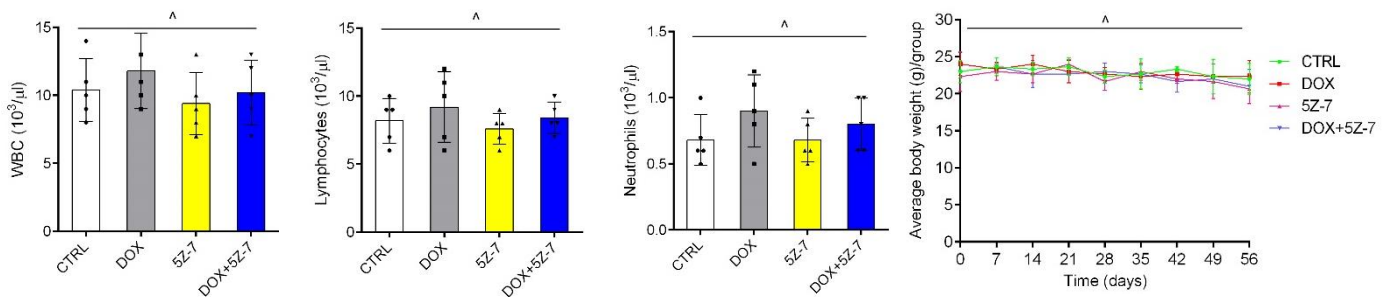

**Supplementary Figure 11. Biochemistry, body weight measurement and regular blood counts of immune-competent animals (C57BL/6 mice) carrying prostate or breast tumors treated by chemotherapeutic agents.** C57BL/6 mice were administered with MIT (or DOX) on a schedule that resembles those designed for drug treatment of animals carrying prostate or breast tumors, without a tumor uptake period of the first 2 weeks, as there was no tumor implantation performed for these immune-competent animals. **(a)** Serum urea, creatinine, alanine aminotransferase (ALT) and alkaline phosphatase (ALP) measurement with terminal bleeds (cardiac punctures) taken at the end of therapeutic regimens (6 weeks). MIT and 5Z-7 were administered either alone or together as dual agents. **(b)** WBC, lymphocyte and neutrophil counts were performed with mice examined in **(a)**. Mouse body weights were determined once per week. **(c)** Serum urea, creatinine, alanine aminotransferase (ALT) and alkaline phosphatase (ALP) measurement with terminal bleeds (cardiac punctures) taken at the end of therapeutic regimens (6 weeks). DOX and 5Z-7 were administered either alone or together as dual agents. **(d)** WBC, lymphocyte and neutrophil counts were performed with mice examined in **(c)**. Mouse body weights were determined once per week. Data are shown as mean  $\pm$  SD and representative of 3 independent experiments. MIT, mitoxantrone. DOX, doxorubicin. 5Z-7, 5Z-7-oxozeaenol. WBC, white blood count. N = 5 per treatment arm.  $^*P > 0.05$ . Data in **a-d** were analyzed using Student's *t*-test.

**a**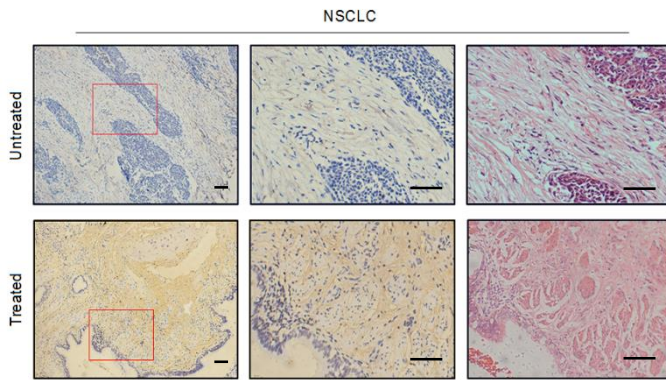**b**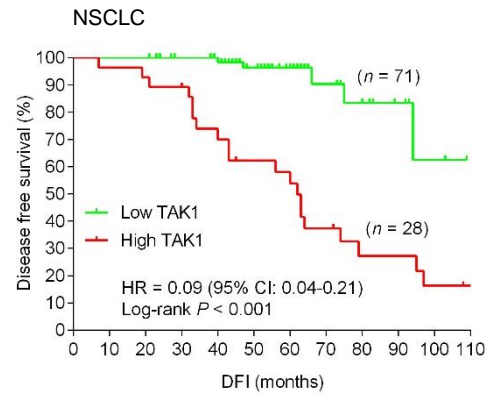**c**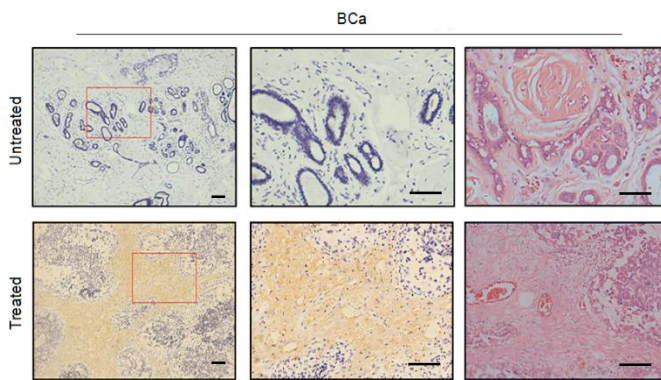**d**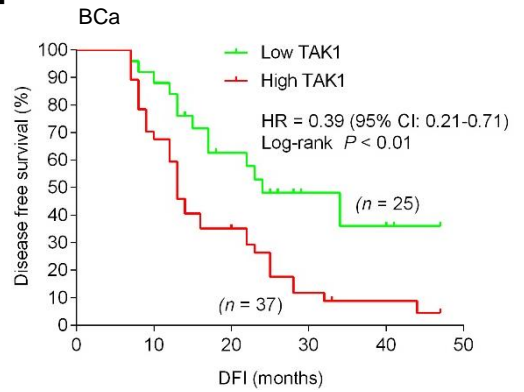

**Supplementary Figure 12. Activation of TAK1 in the TME by genotoxic chemotherapy and its pathological correlation with disease free survival (DFS) of cancer patients in the post-treatment stage.** (a) IHC and HE staining of phosphorylated TAK1 (p-TAK1) in the tumors of NSCLC patients after chemotherapeutic treatments. In each tumor type, red rectangular in the left IHC image is zoomed into the middle image, with an HE-staining image supplied on the right. Scale bars, 100  $\mu$ m. (b) Kaplan-Meier analysis of NSCLC patients stratified according to TAK1 activation per p-TAK1 staining intensity (low, average score < 2, green line, n = 71; high, average score  $\geq$  2, red line, n = 28). DFS represents the length (months) of period calculated from the date of NSCLC diagnosis to the point of first time disease relapse. Survival curves calculated according to the Kaplan–Meier method, with  $P < 0.05$  considered significant. (c) IHC and HE staining of phosphorylated TAK1 (p-TAK1) in the tumors of BCa patients after chemotherapeutic treatments. In each tumor type, red rectangular in the left IHC image is zoomed into the middle image, with an HE-staining image supplied on the right. Scale bars, 100  $\mu$ m. (d) Survival analysis performed for BCa patients stratified according to TAK1 activation per p-TAK1 staining intensity (low, average score < 2, green line, n = 25; high, average score  $\geq$  2, red line, n = 37). Data in **b** and **d** were compared with log-rank (Mantel-Cox) test.

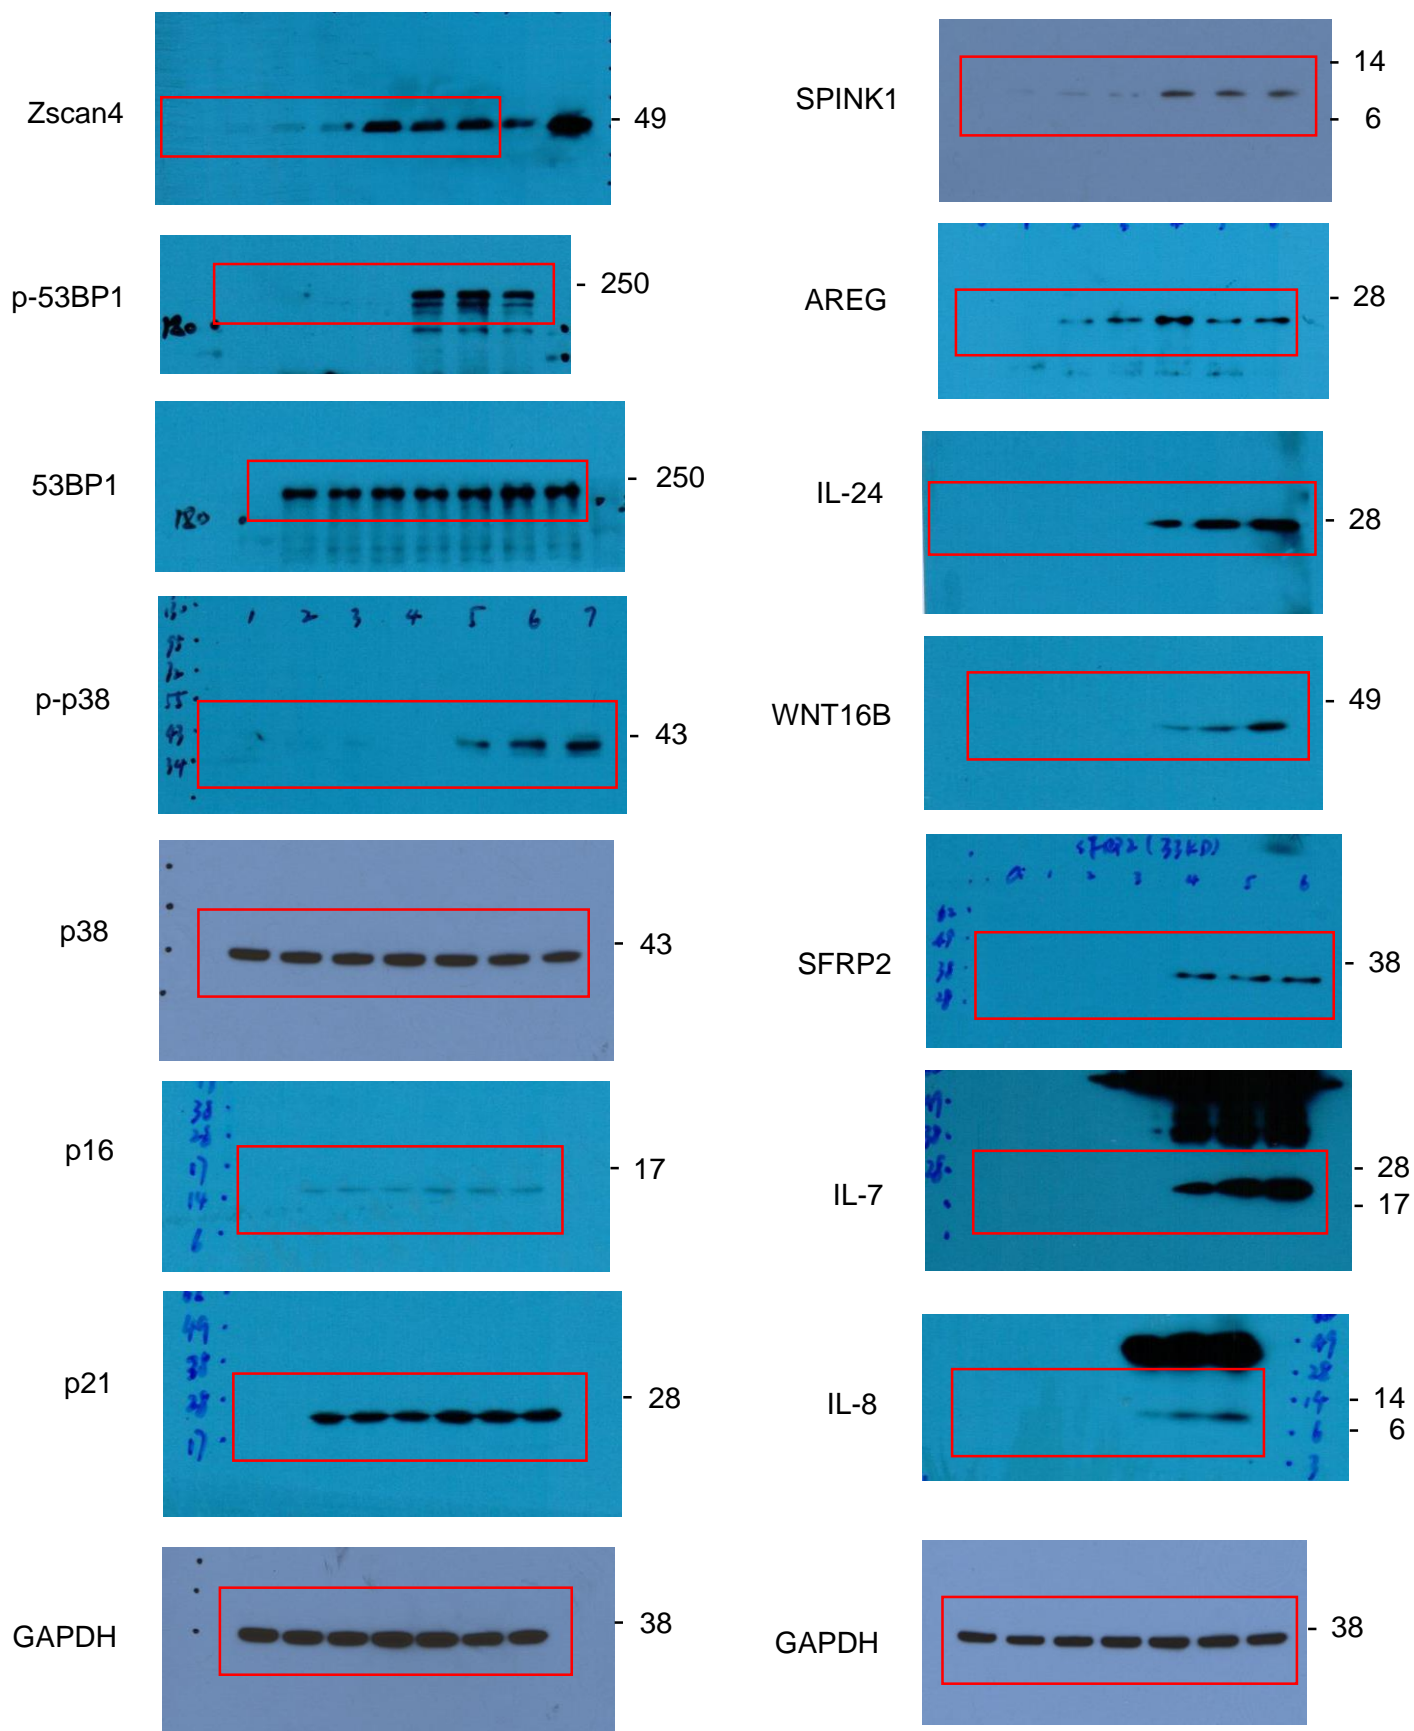

Supplementary Figure 13. The uncropped scans of immunoblots



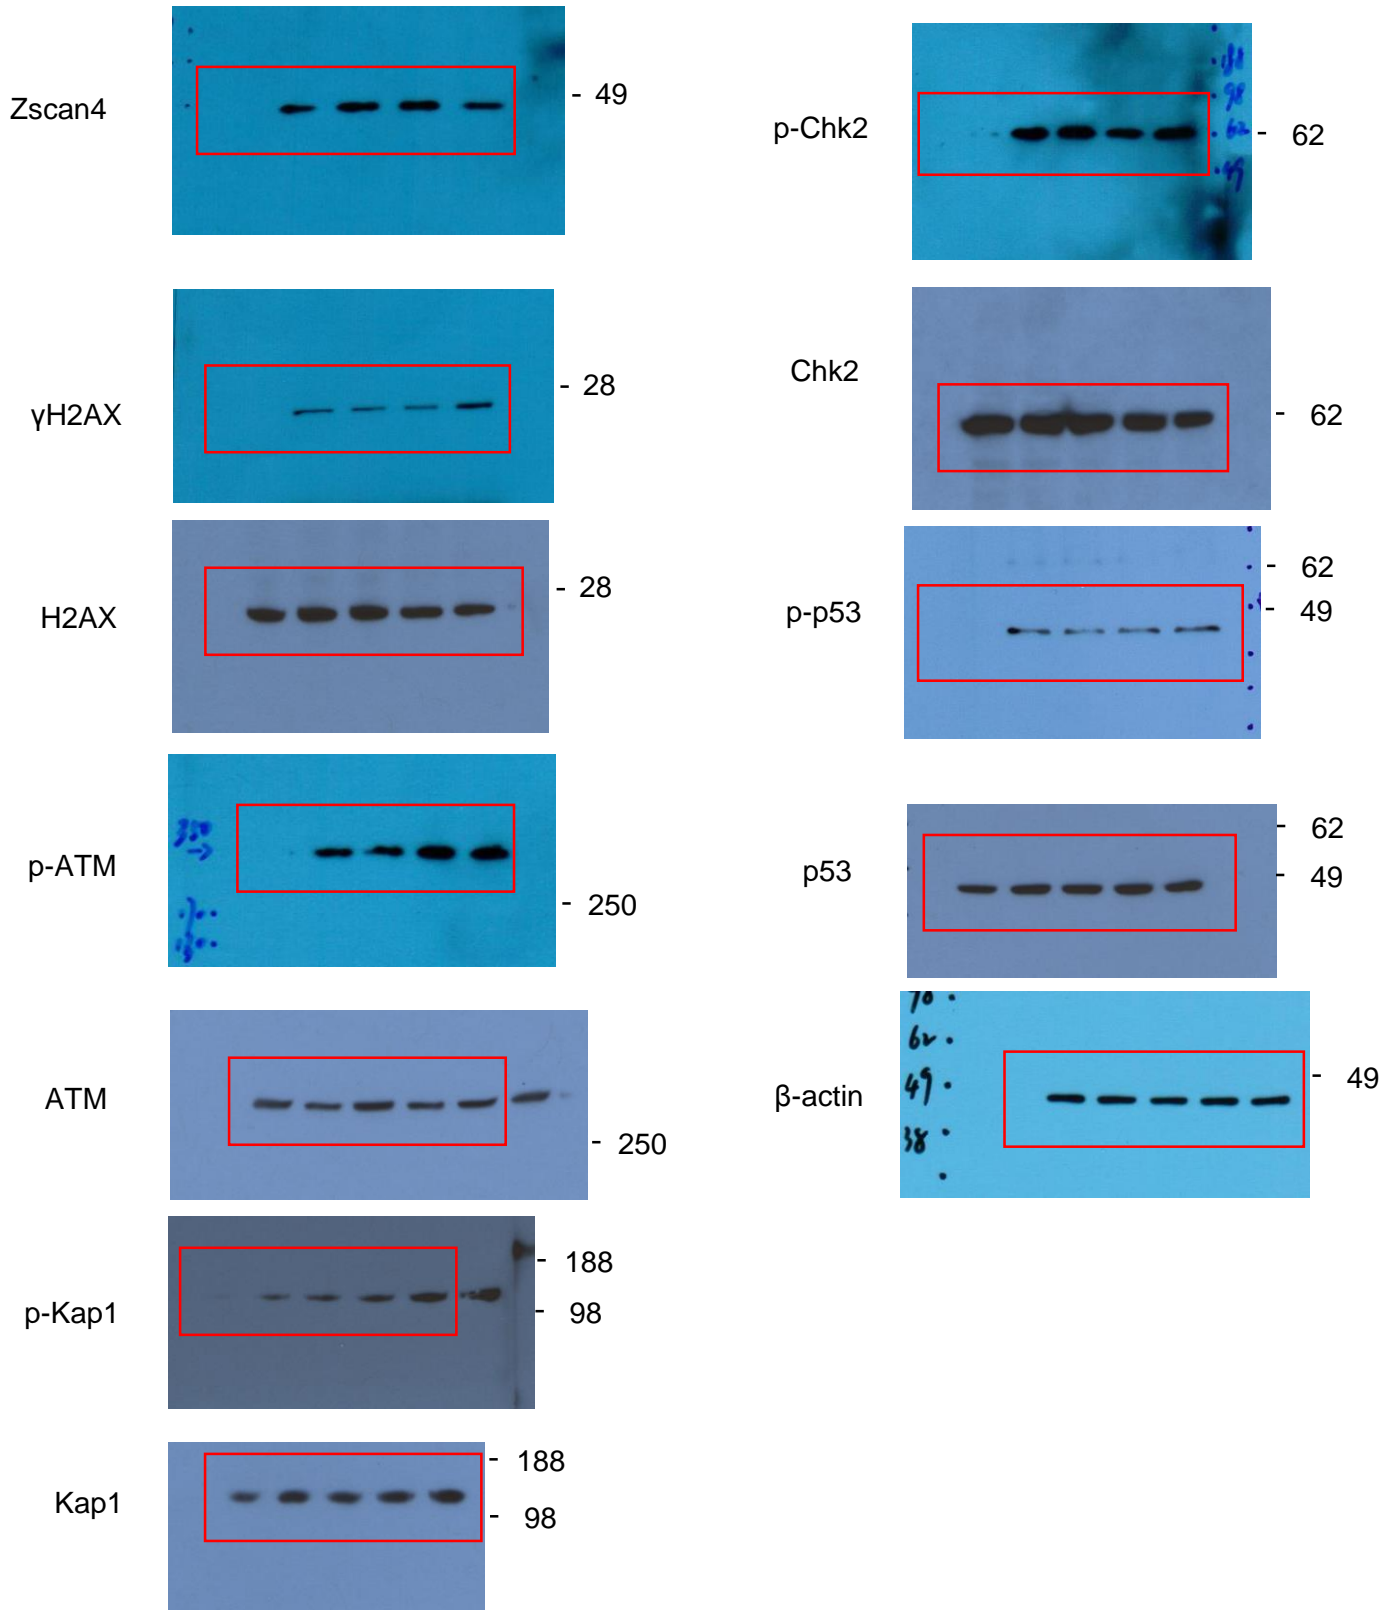

Supplementary Figure 13. The uncropped scans of immunoblots (continued)

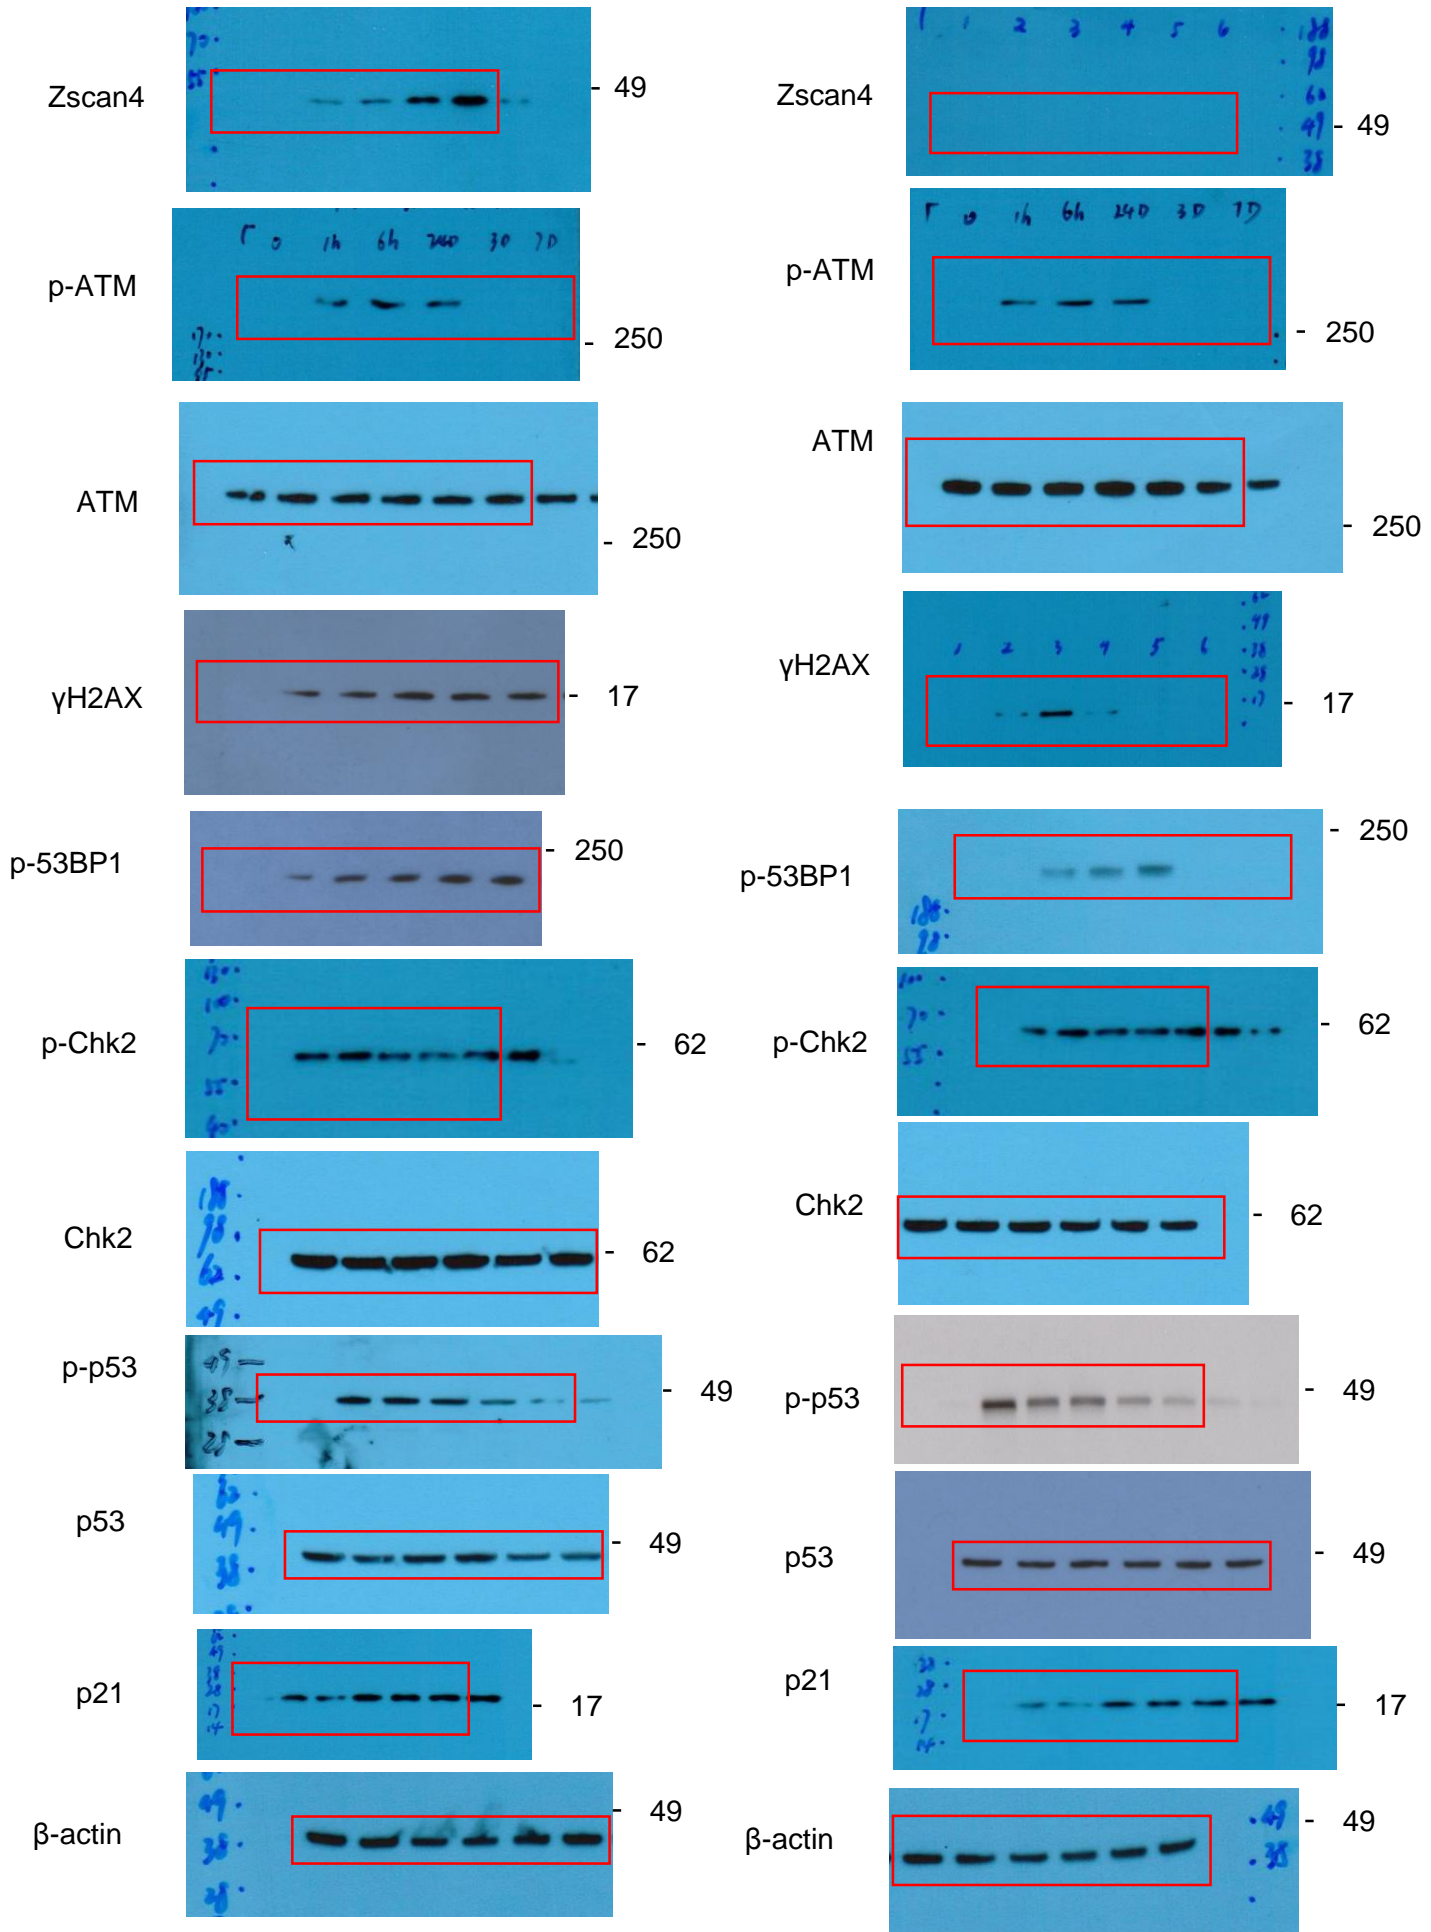

**Supplementary Figure 13. The uncropped scans of immunoblots (continued)**

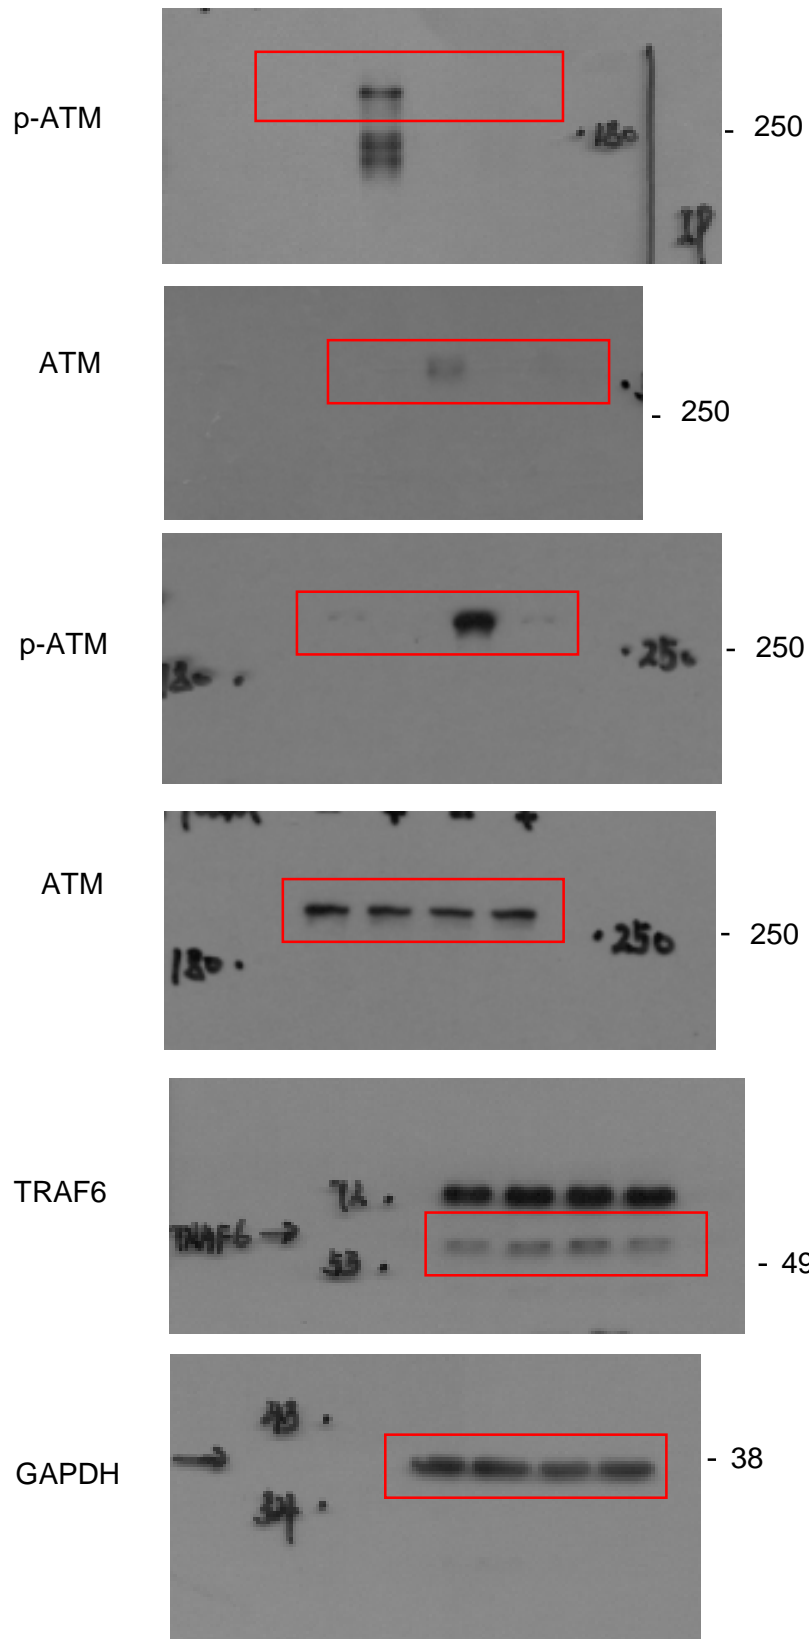

Supplementary Figure 13. The uncropped scans of immunoblots (continued)

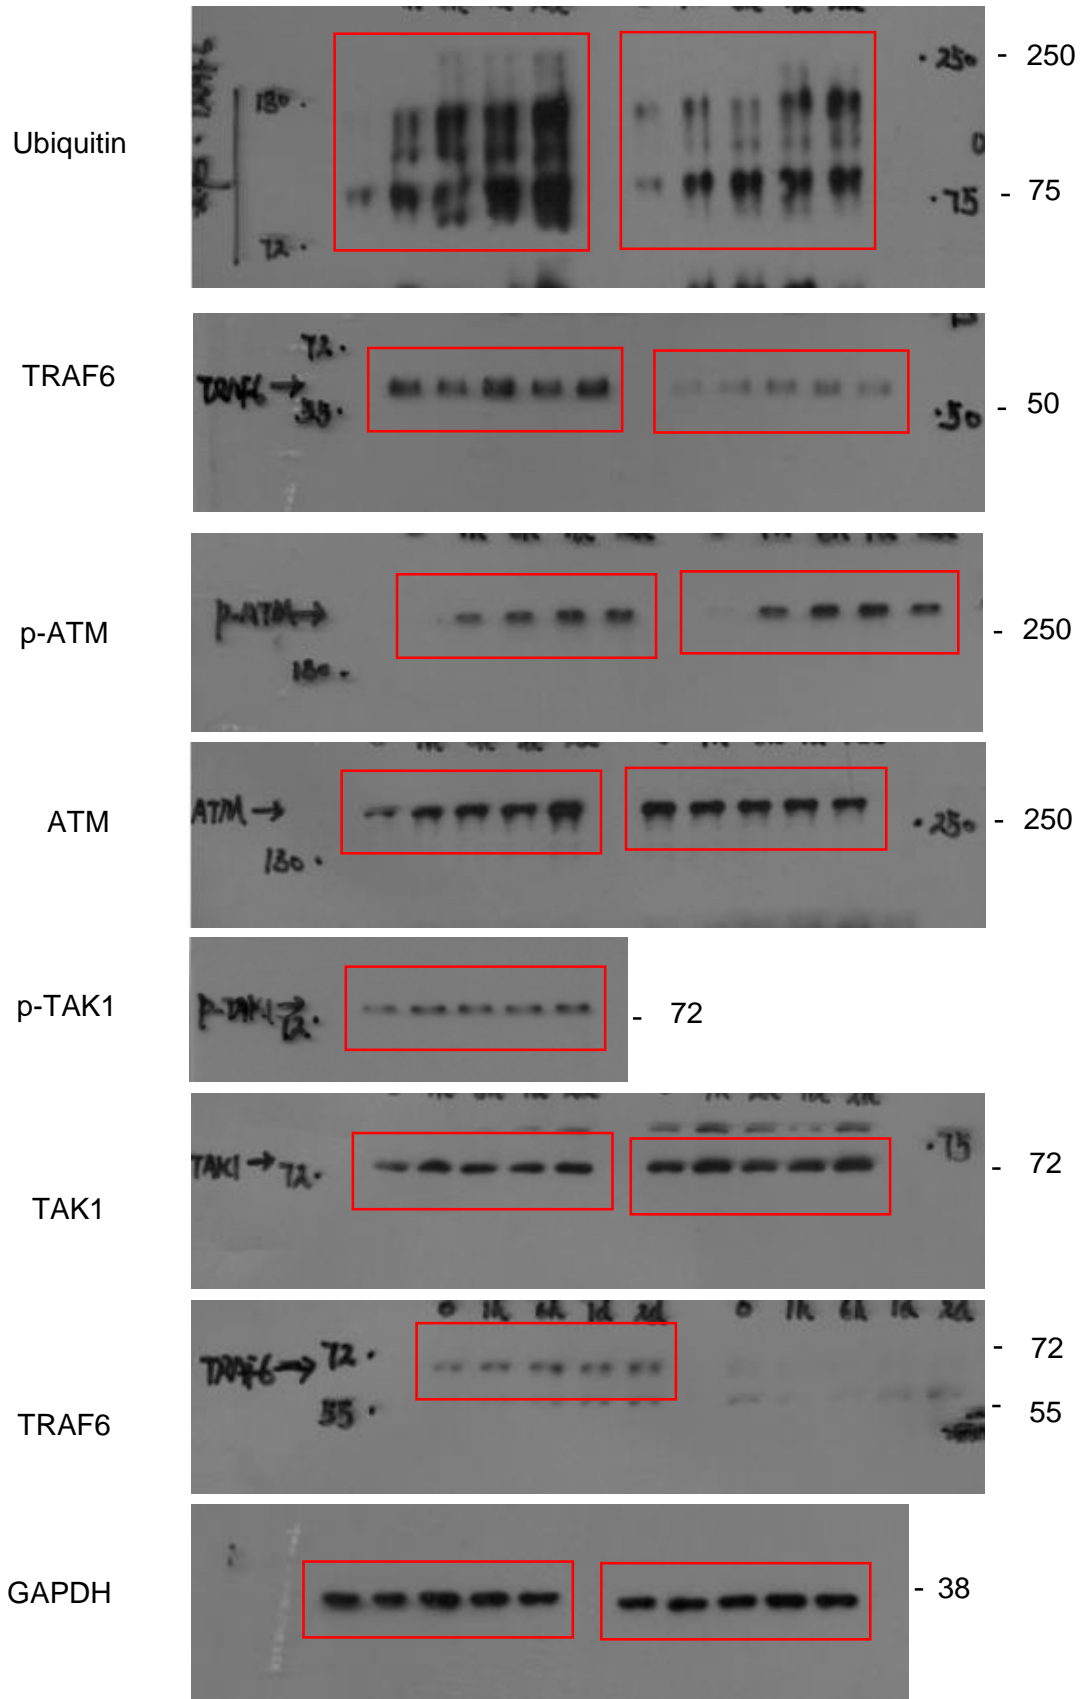

Supplementary Figure 13. The uncropped scans of immunoblots (continued)

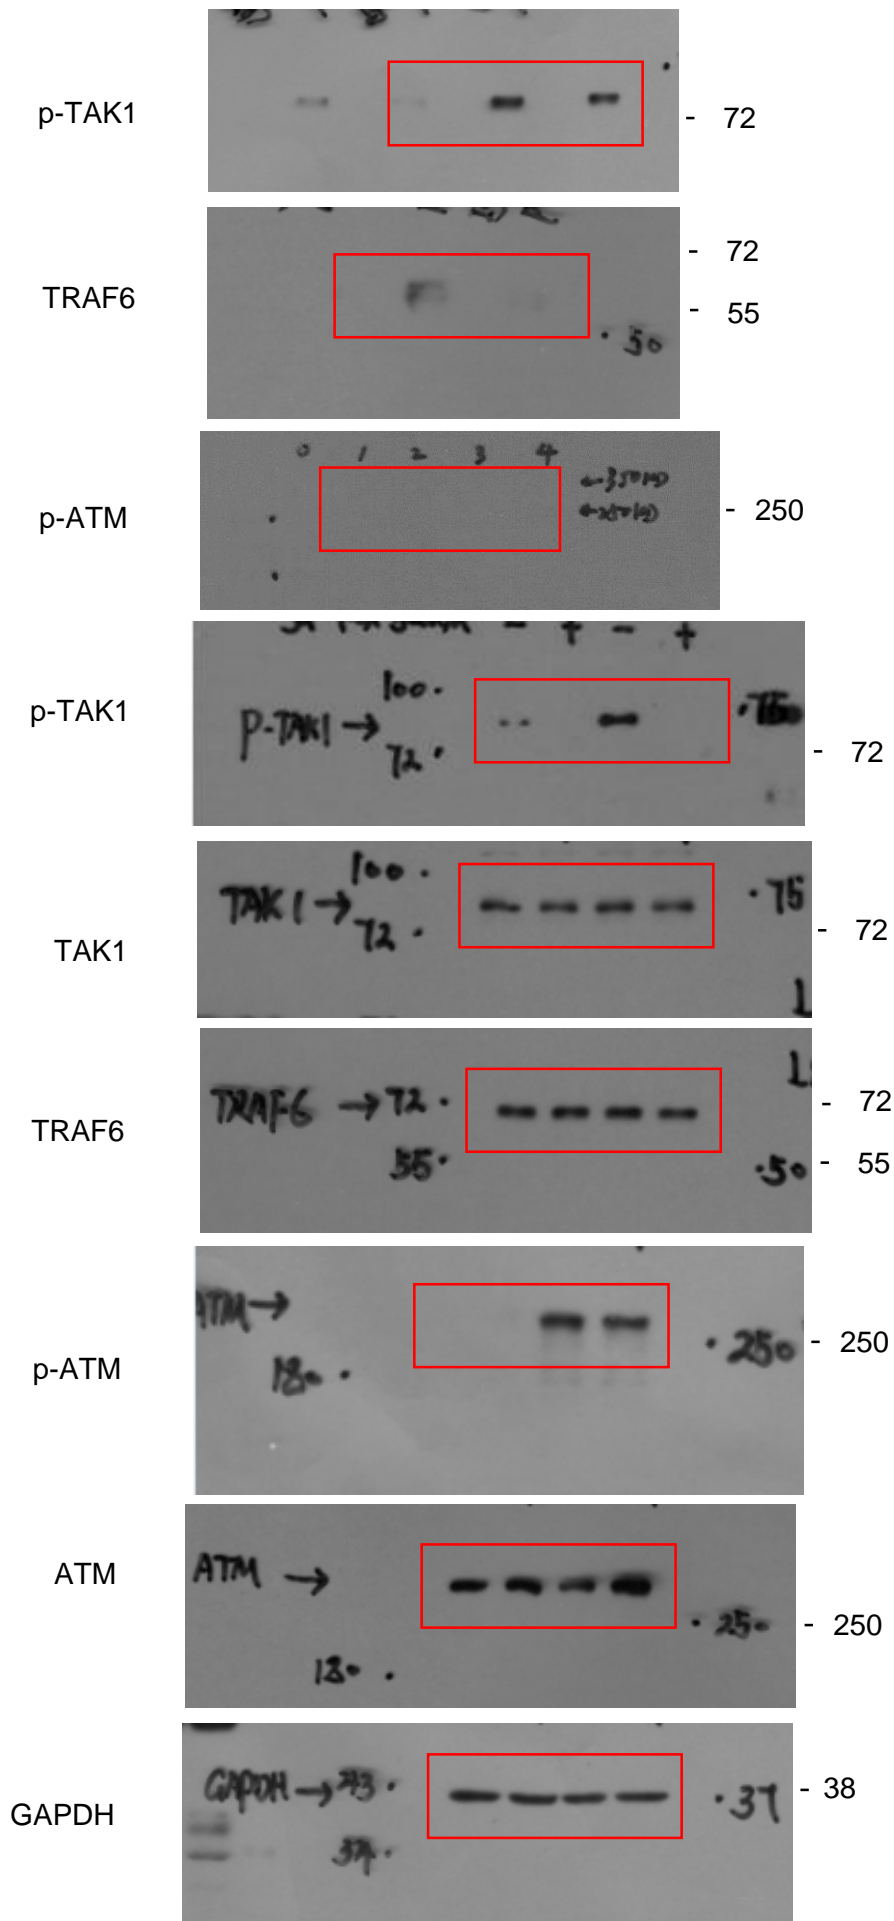

Supplementary Figure 13. The uncropped scans of immunoblots (continued)

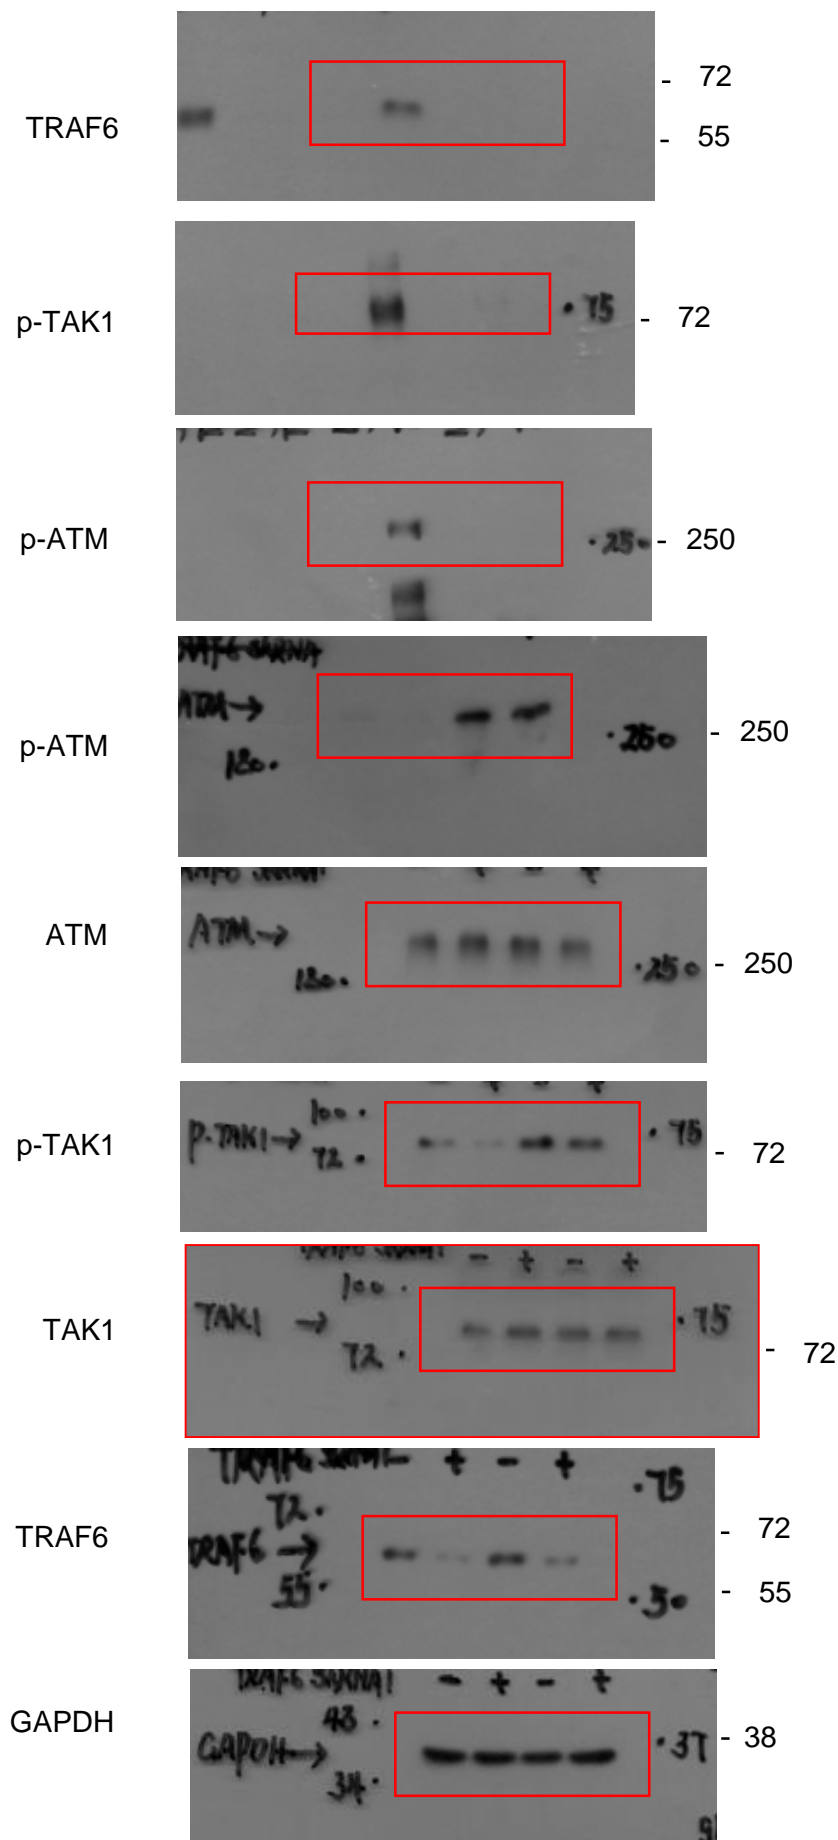

Supplementary Figure 13. The uncropped scans of immunoblots (continued)

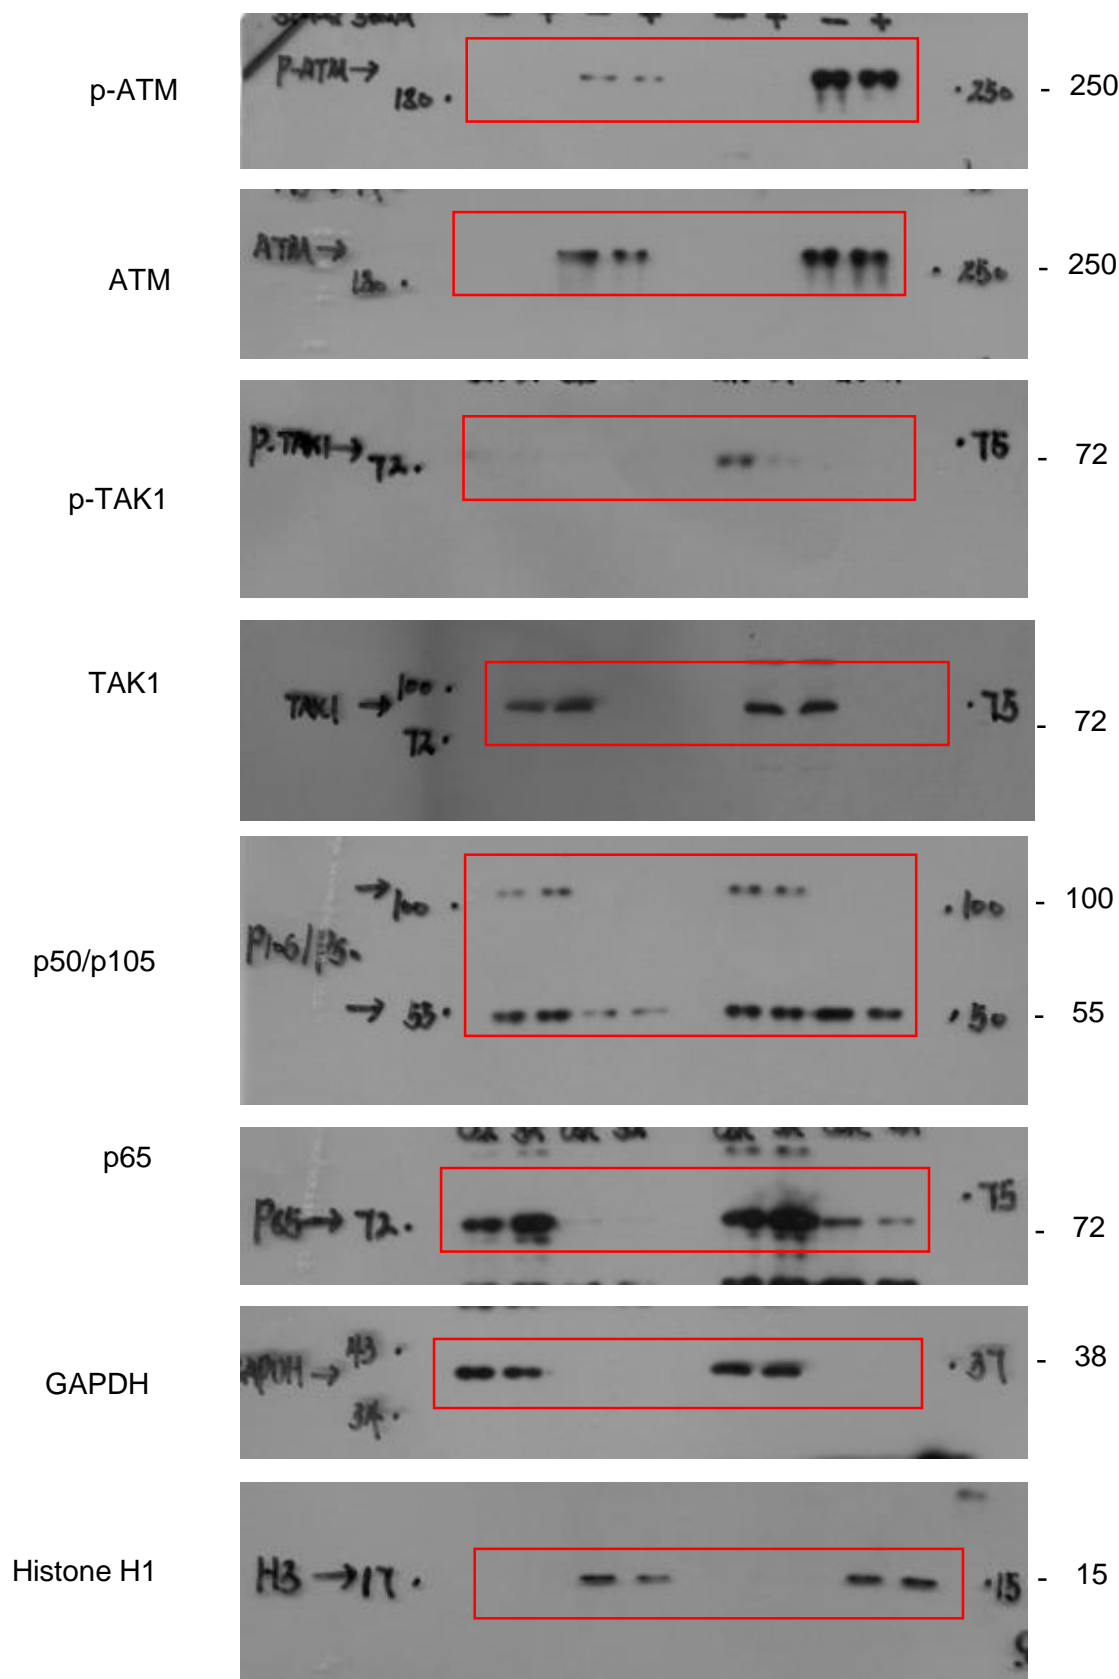

Supplementary Figure 13. The uncropped scans of immunoblots (continued)

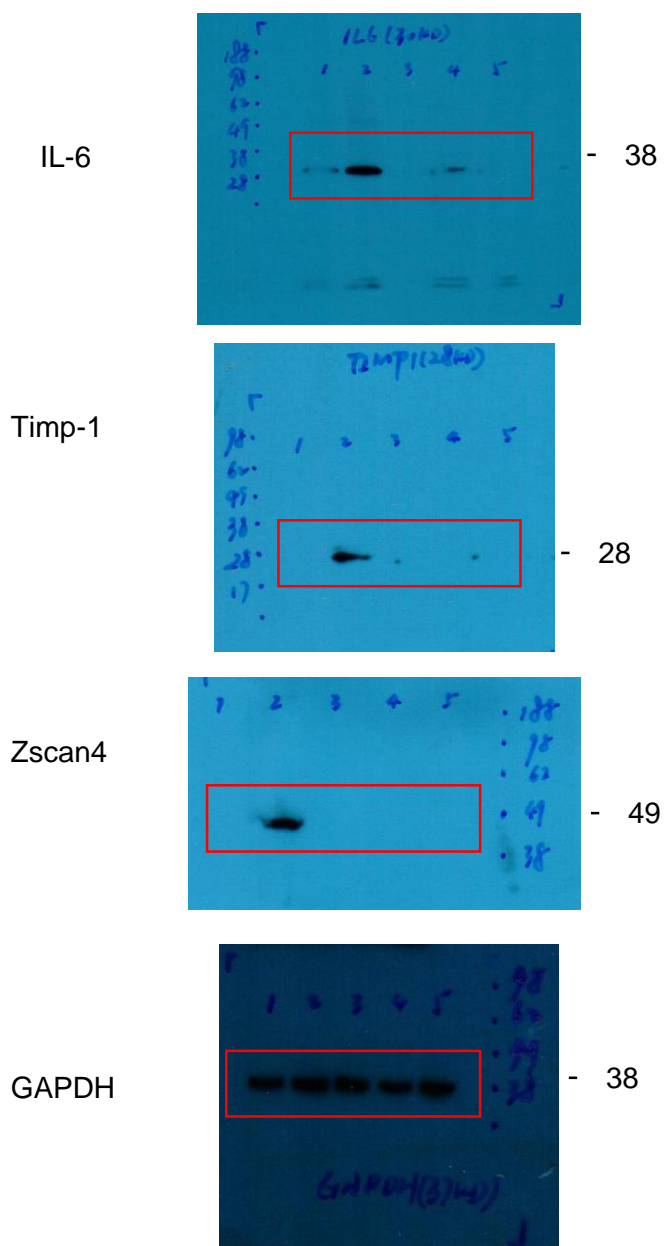

Supplementary Figure 13. The uncropped scans of immunoblots (continued)



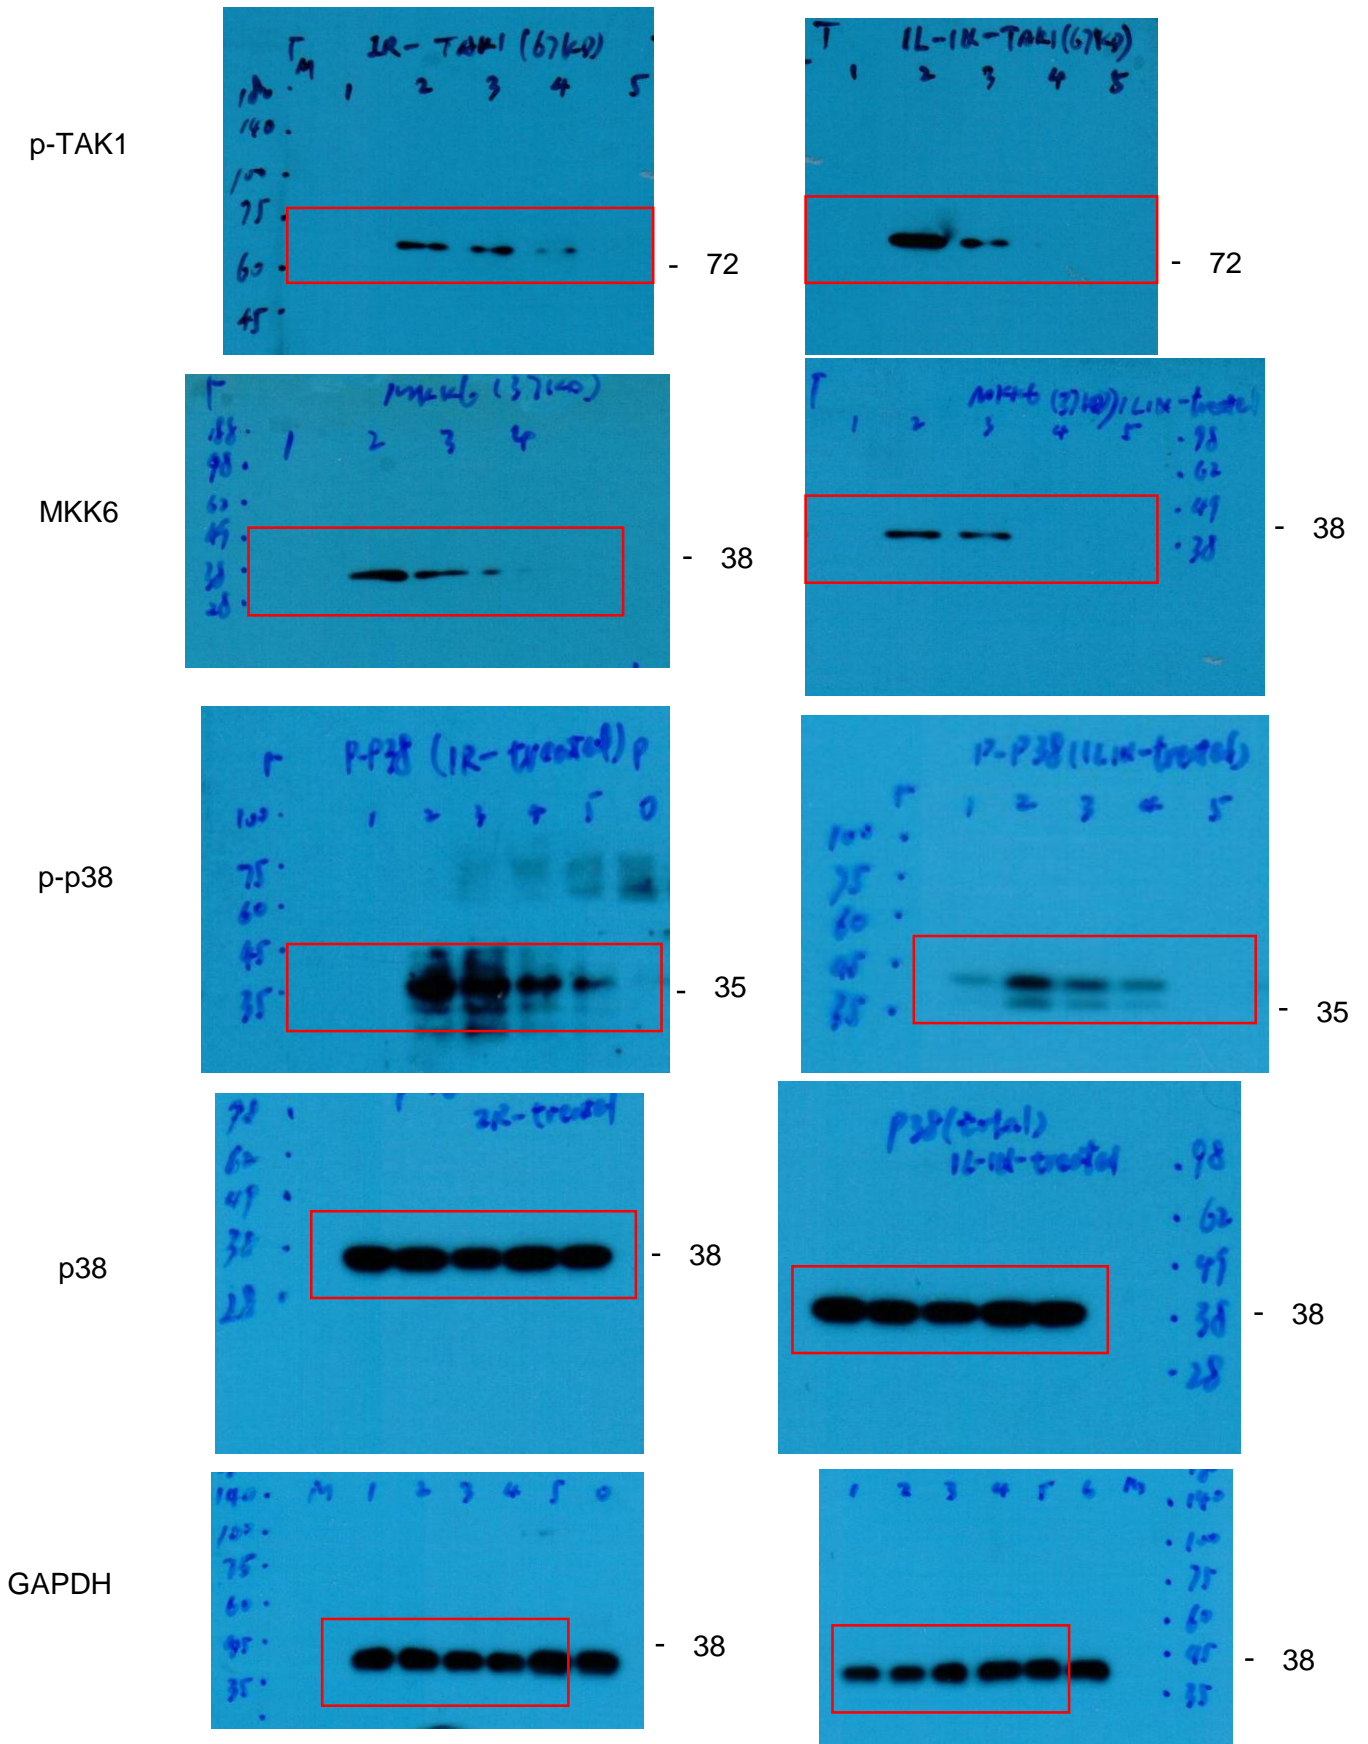

Supplementary Figure 13. The uncropped scans of immunoblots (continued)

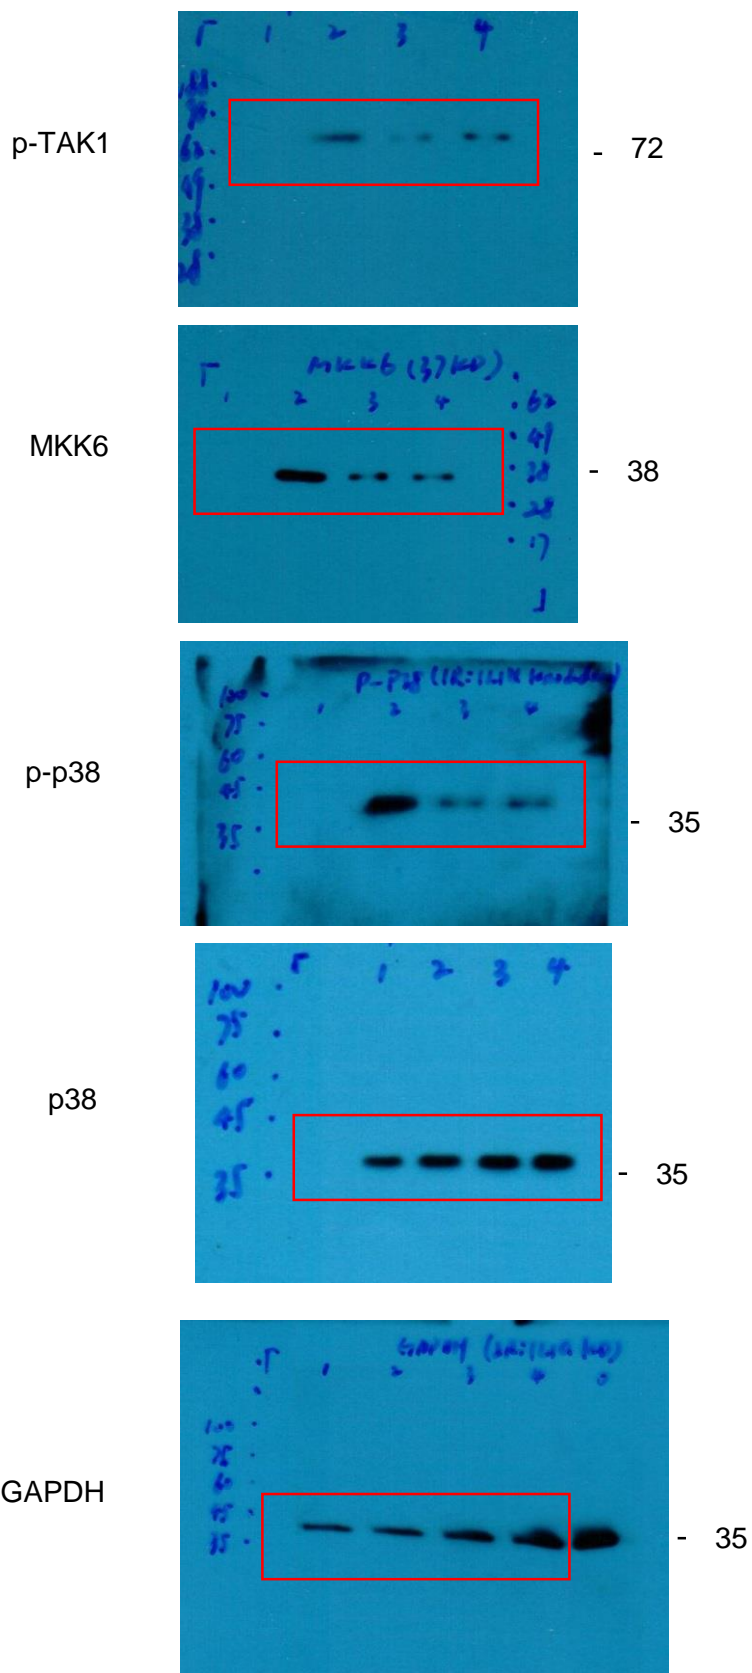

Supplementary Figure 13. The uncropped scans of immunoblots (continued)

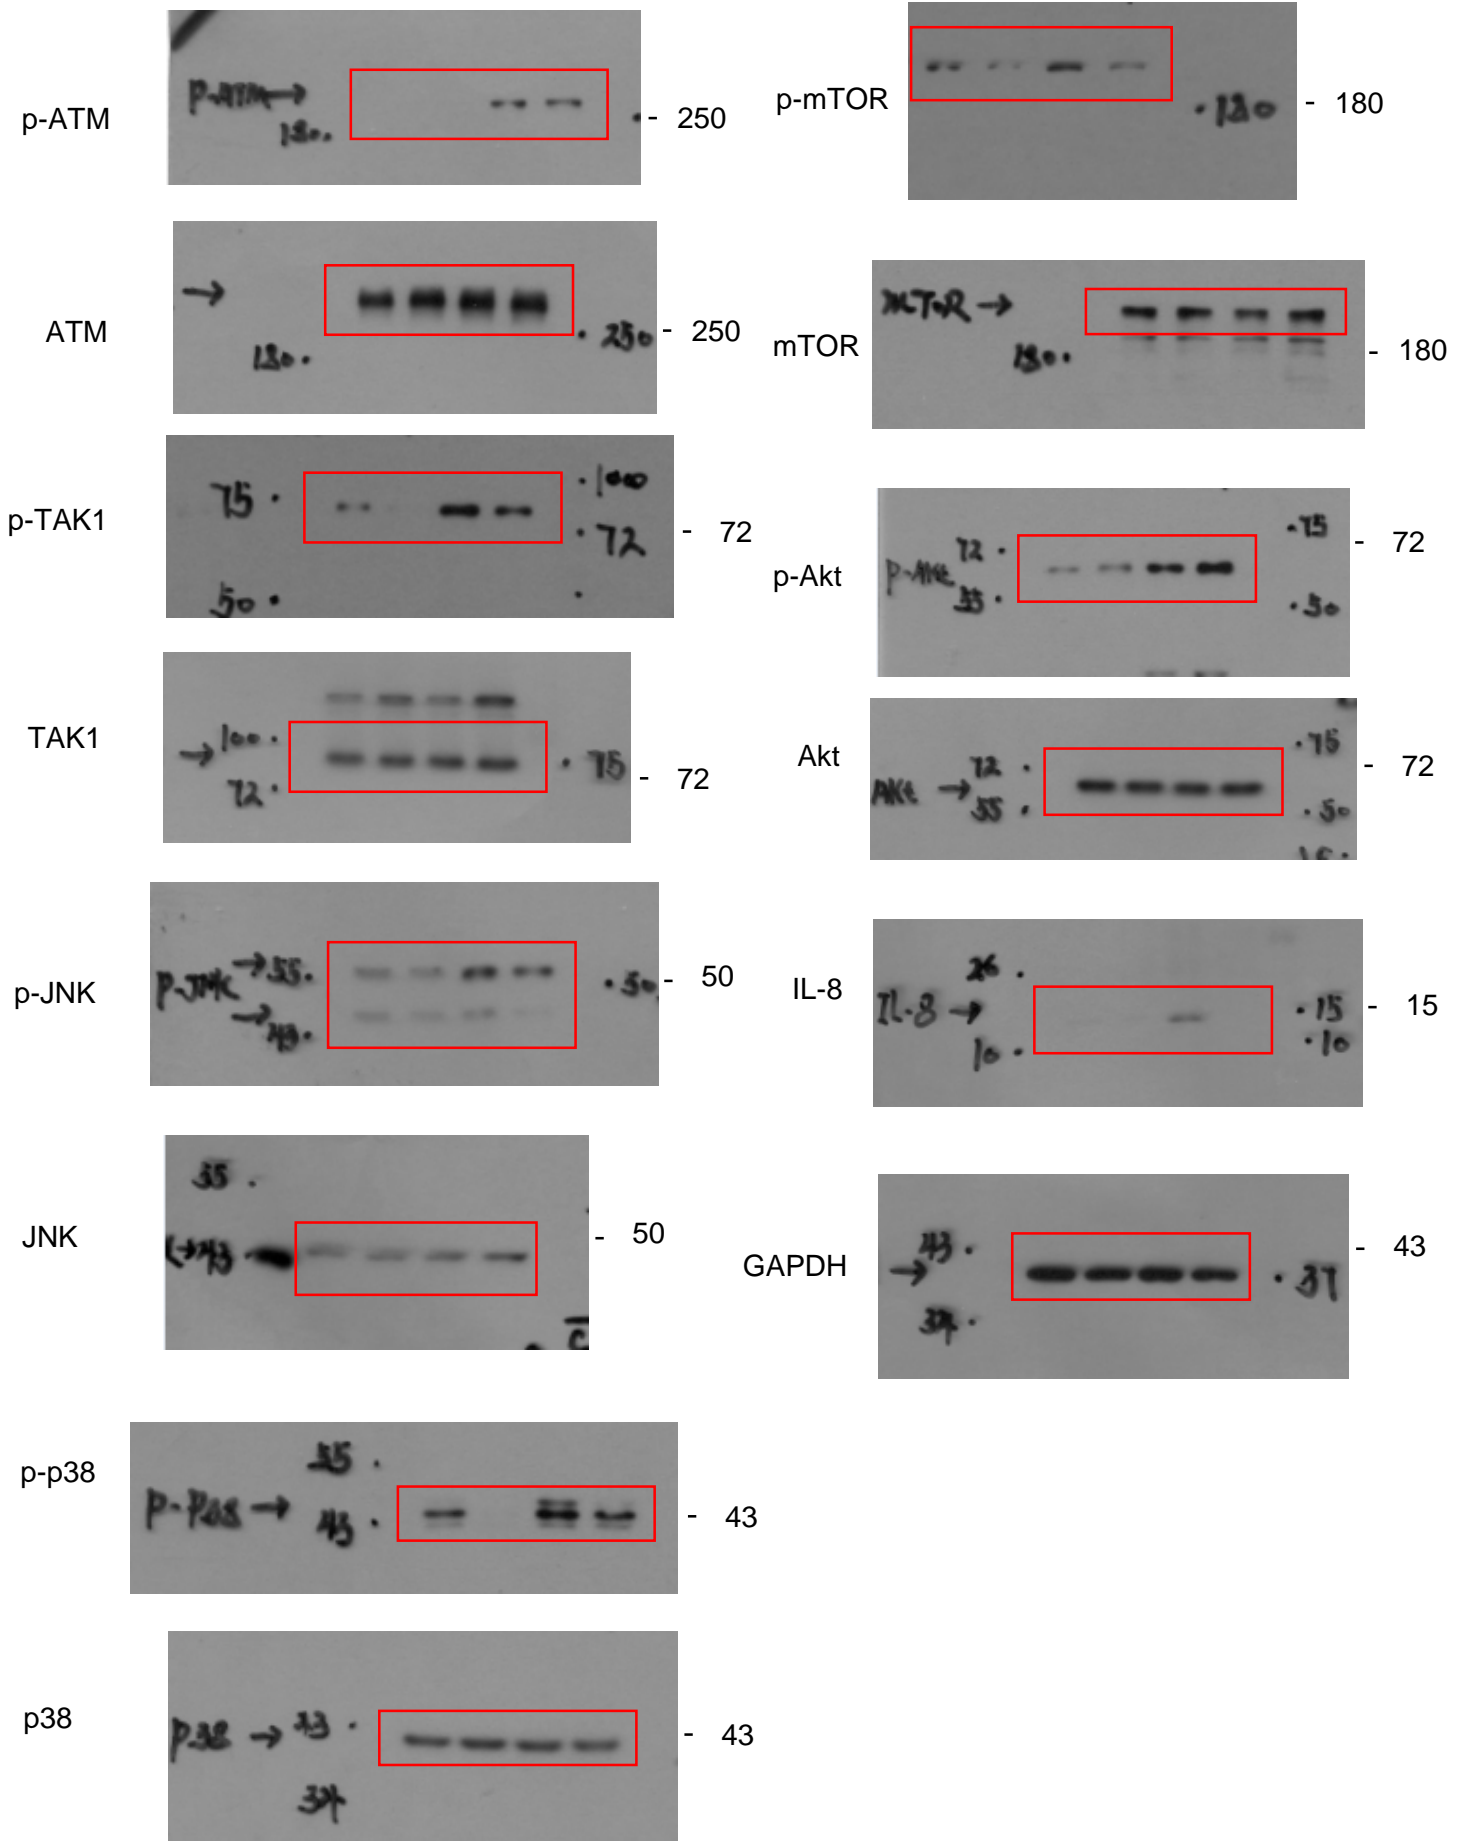

Supplementary Figure 13. The uncropped scans of immunoblots (continued)

**Fig. 6a**

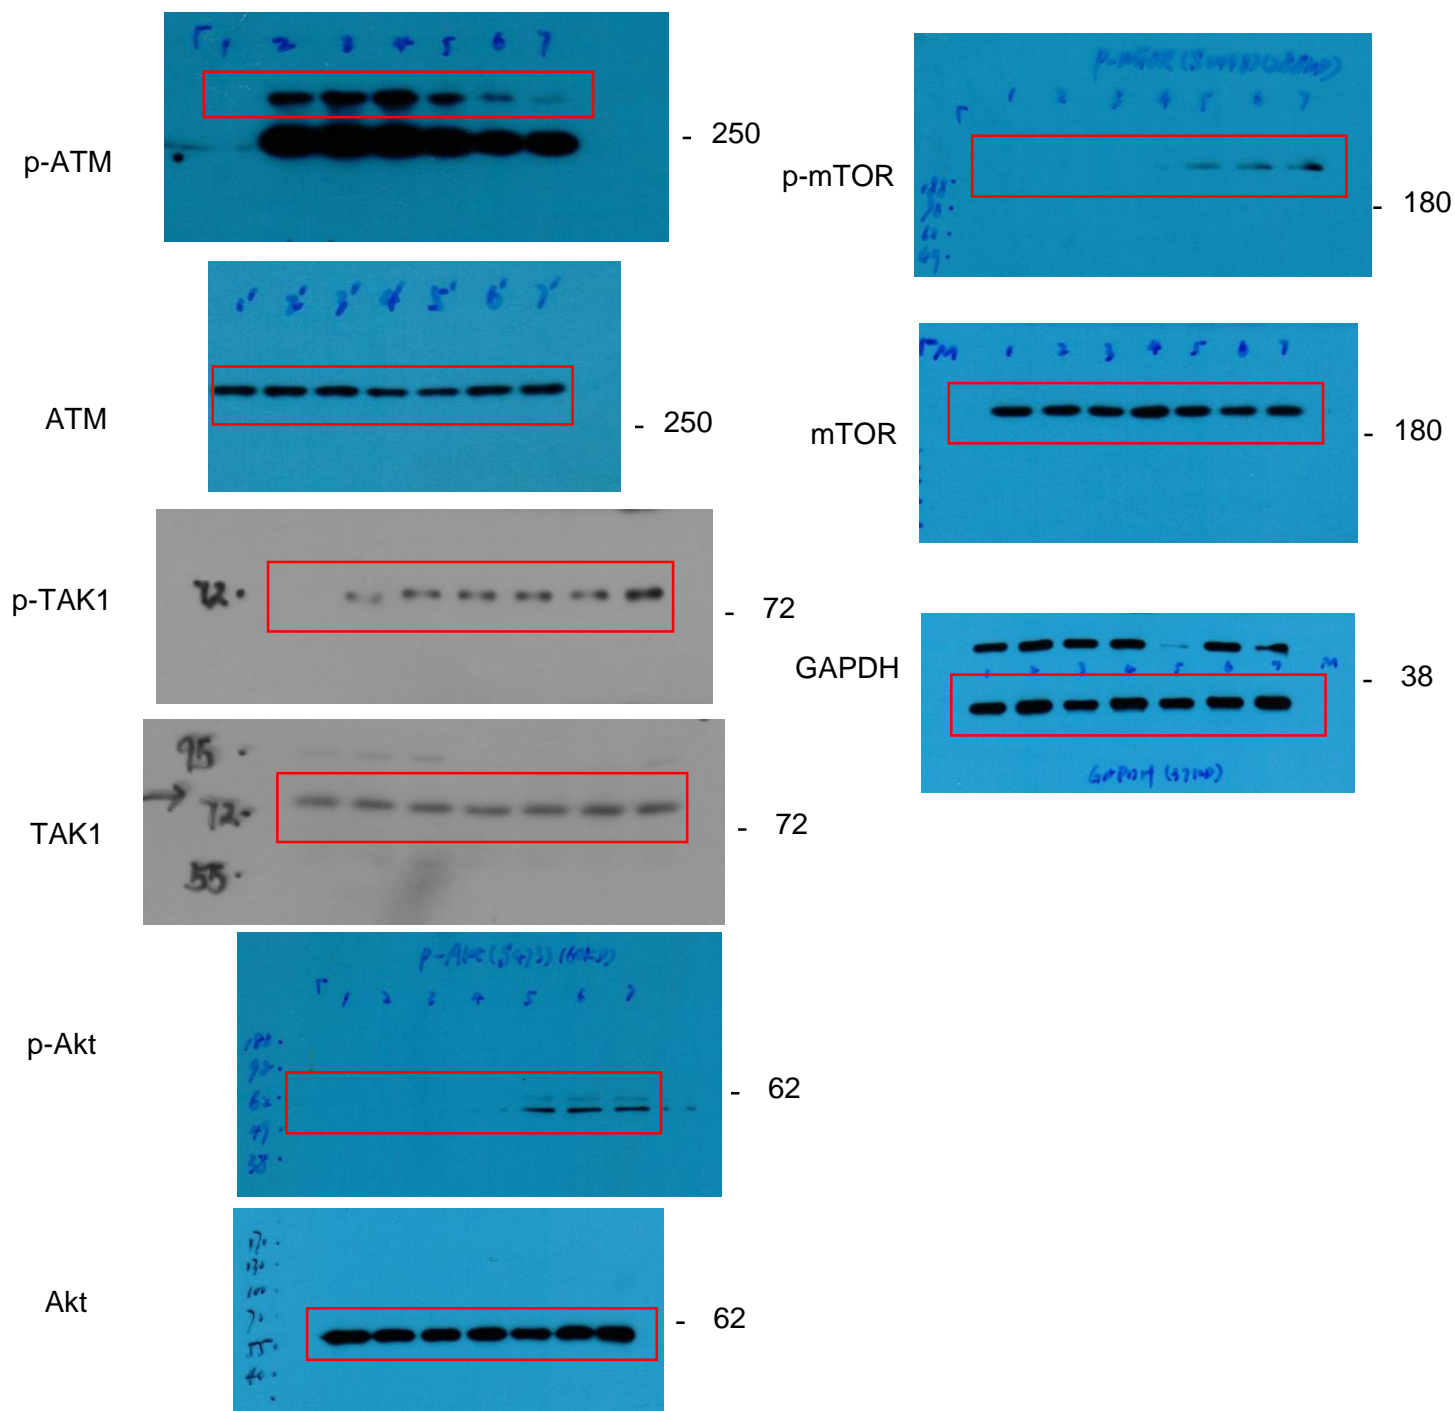

**Supplementary Figure 13. The uncropped scans of immunoblots (continued)**

**Fig. 6c**

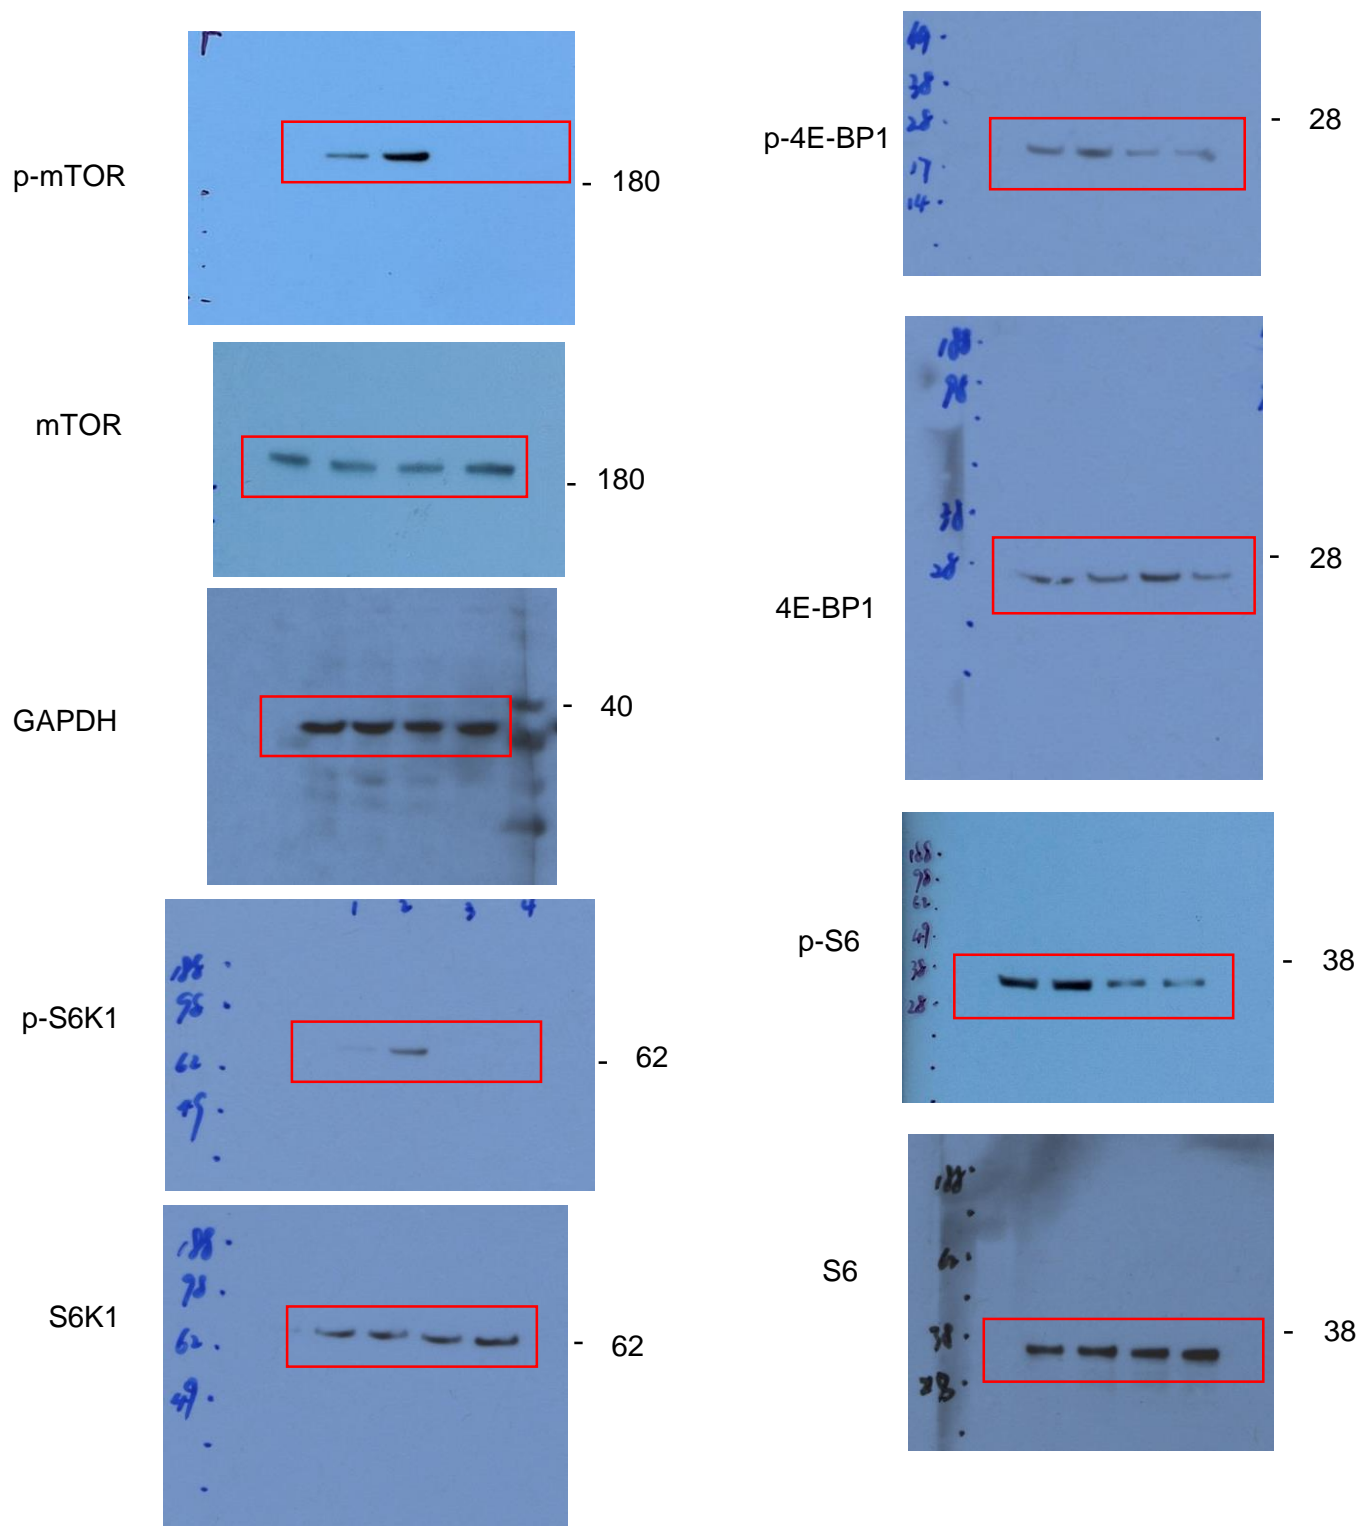

**Supplementary Figure 13. The uncropped scans of immunoblots (continued)**



**Fig. 6f**

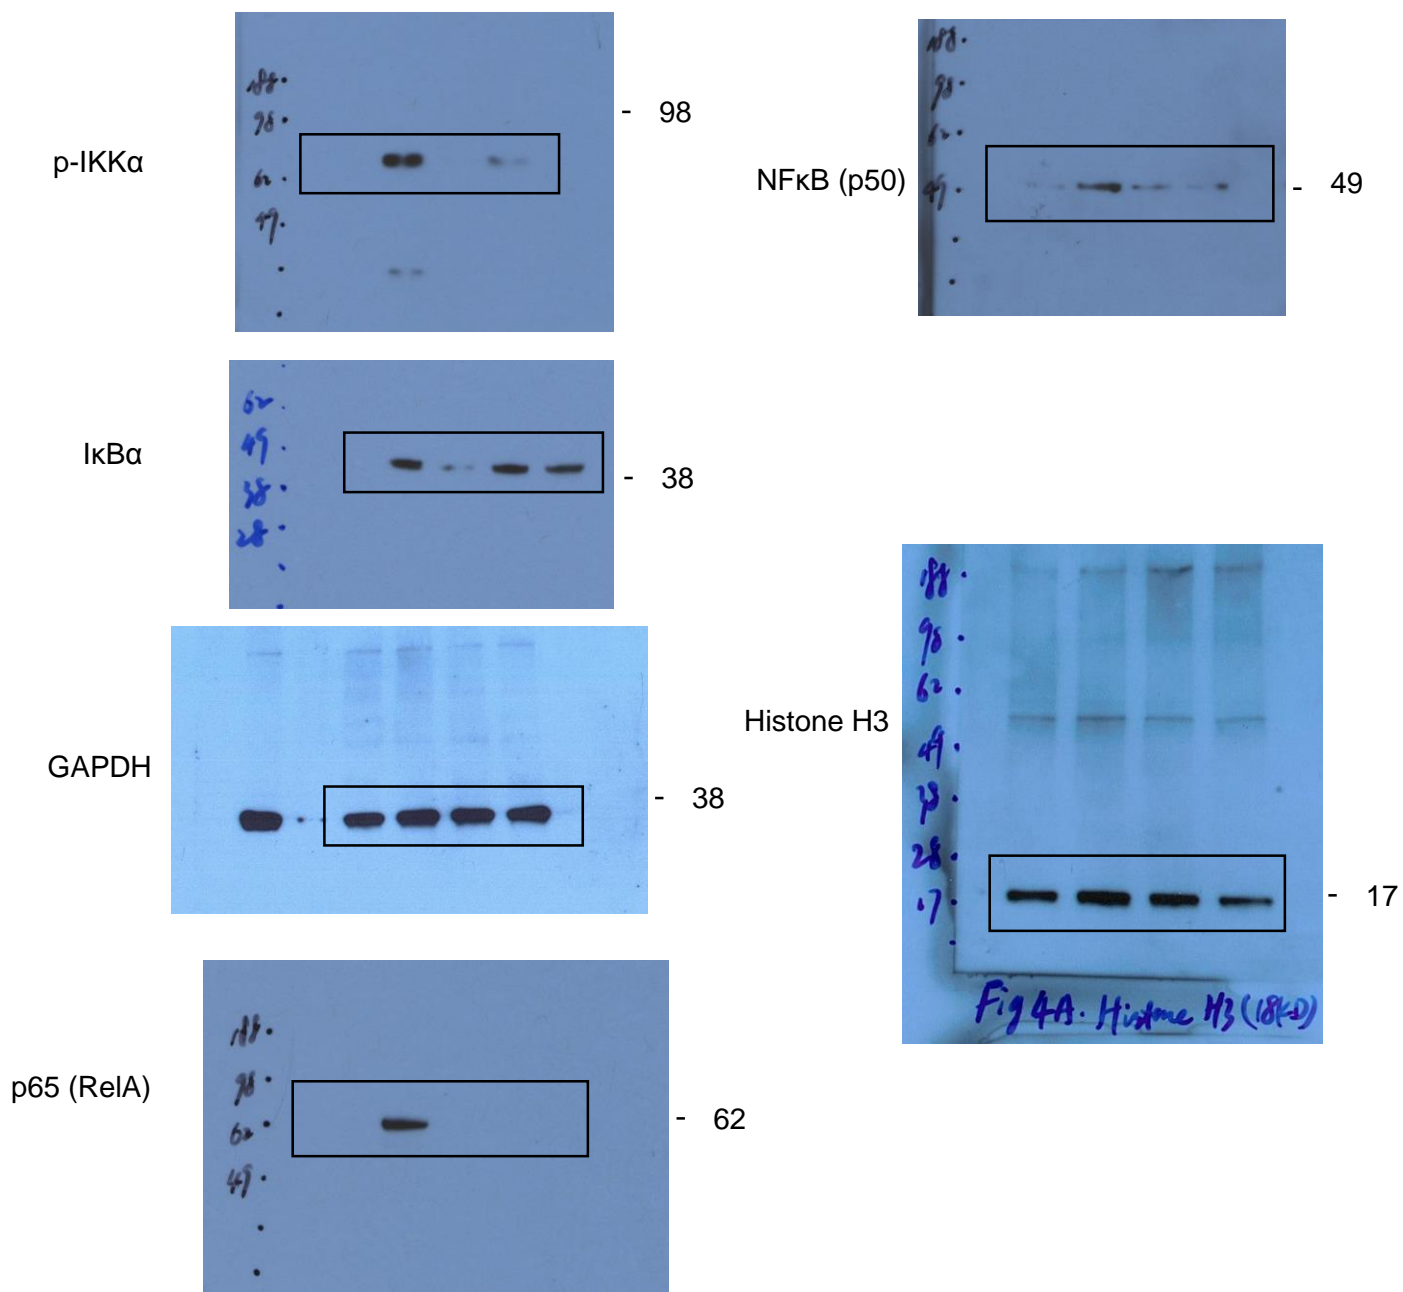

**Supplementary Figure 13. The uncropped scans of immunoblots (continued)**

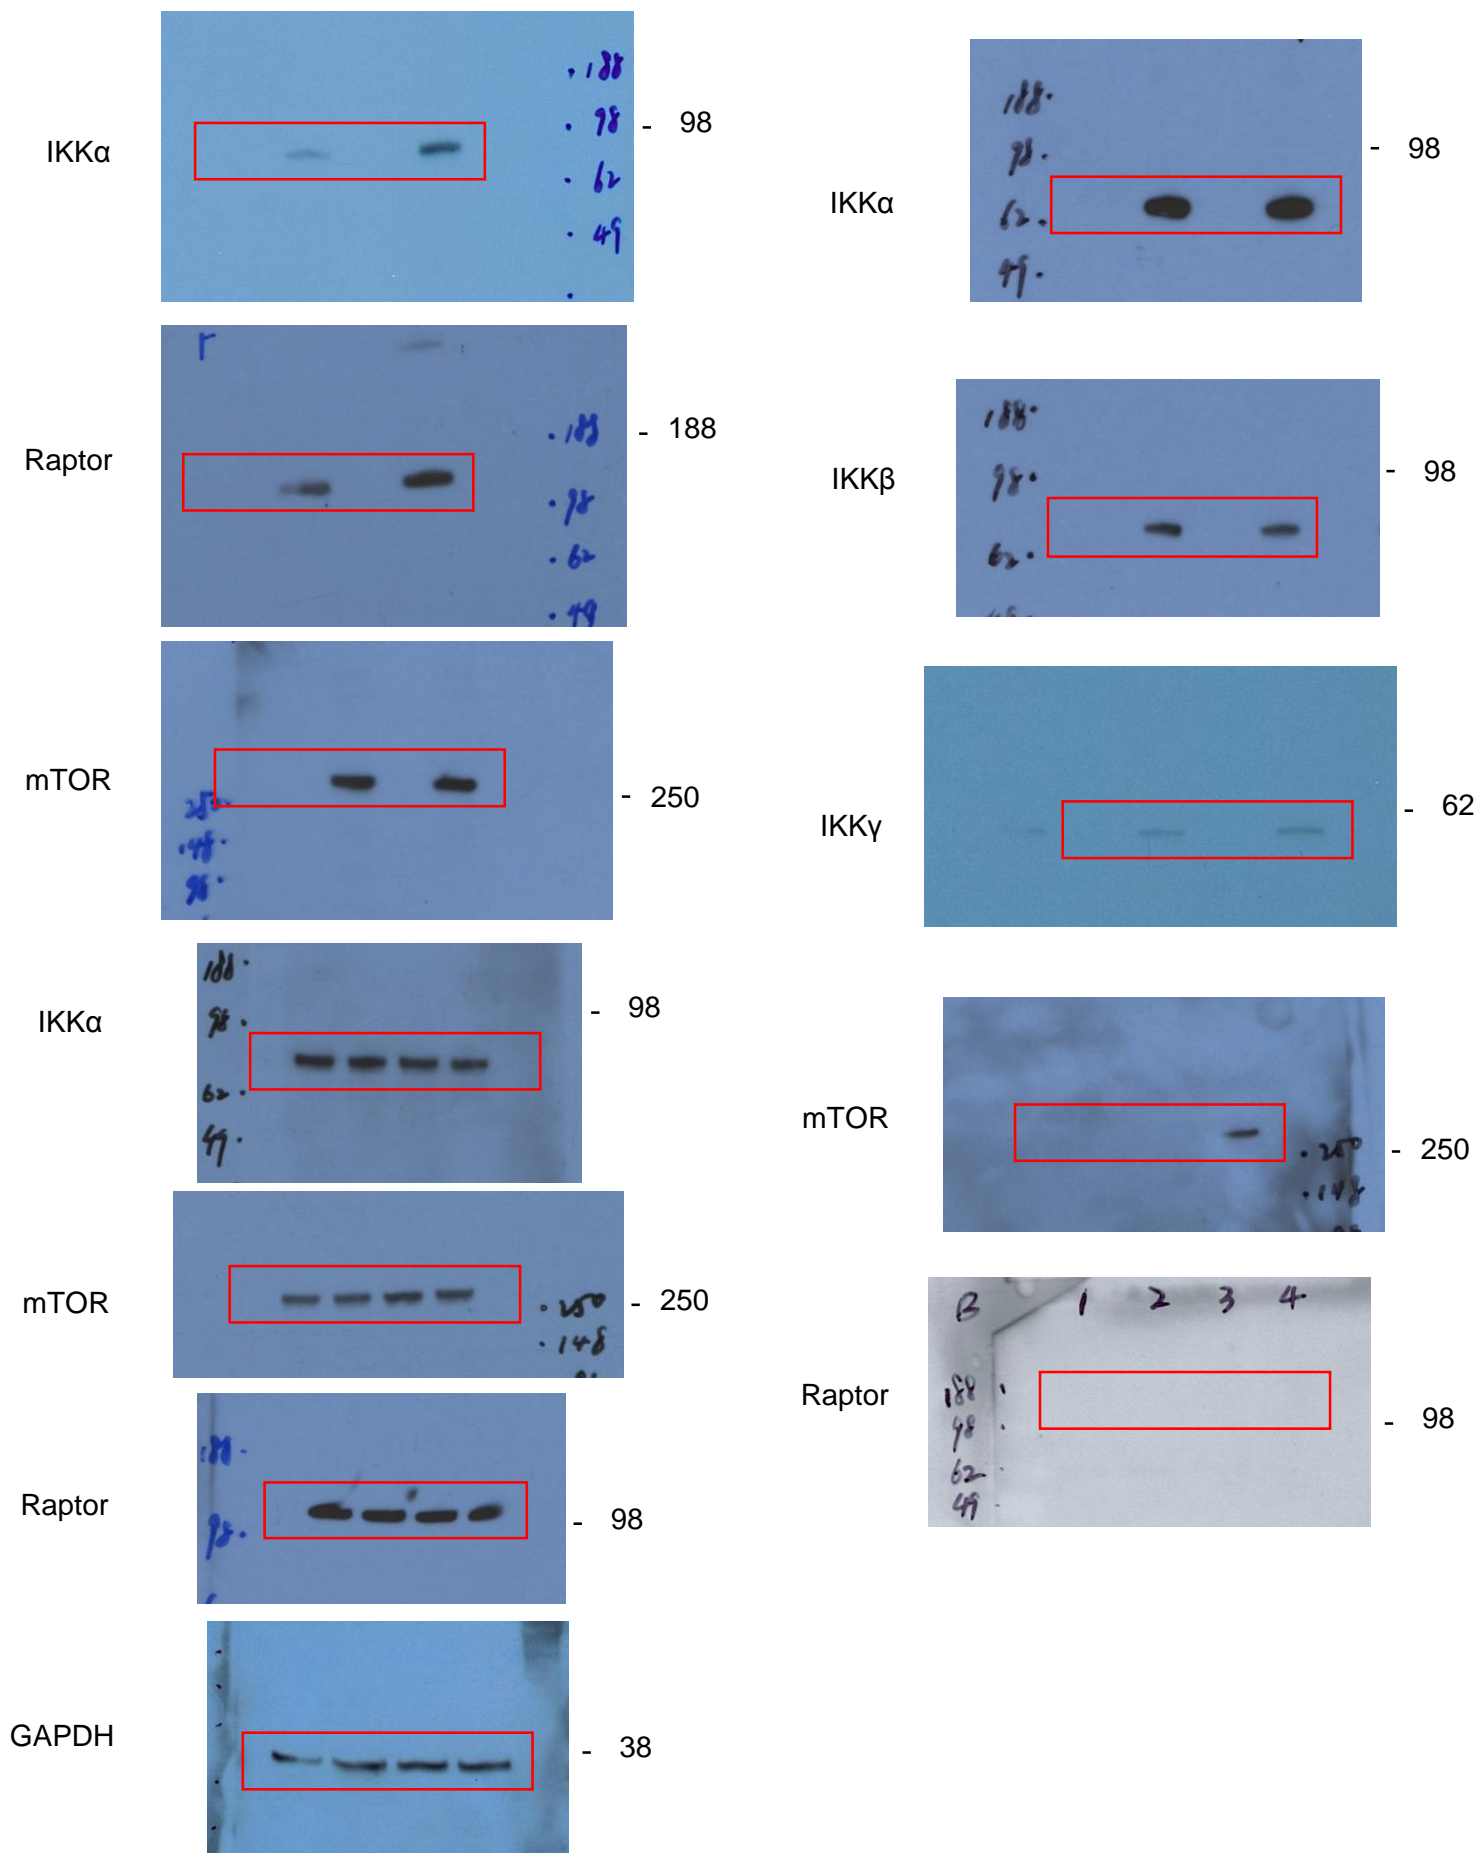

Supplementary Figure 13. The uncropped scans of immunoblots (continued)

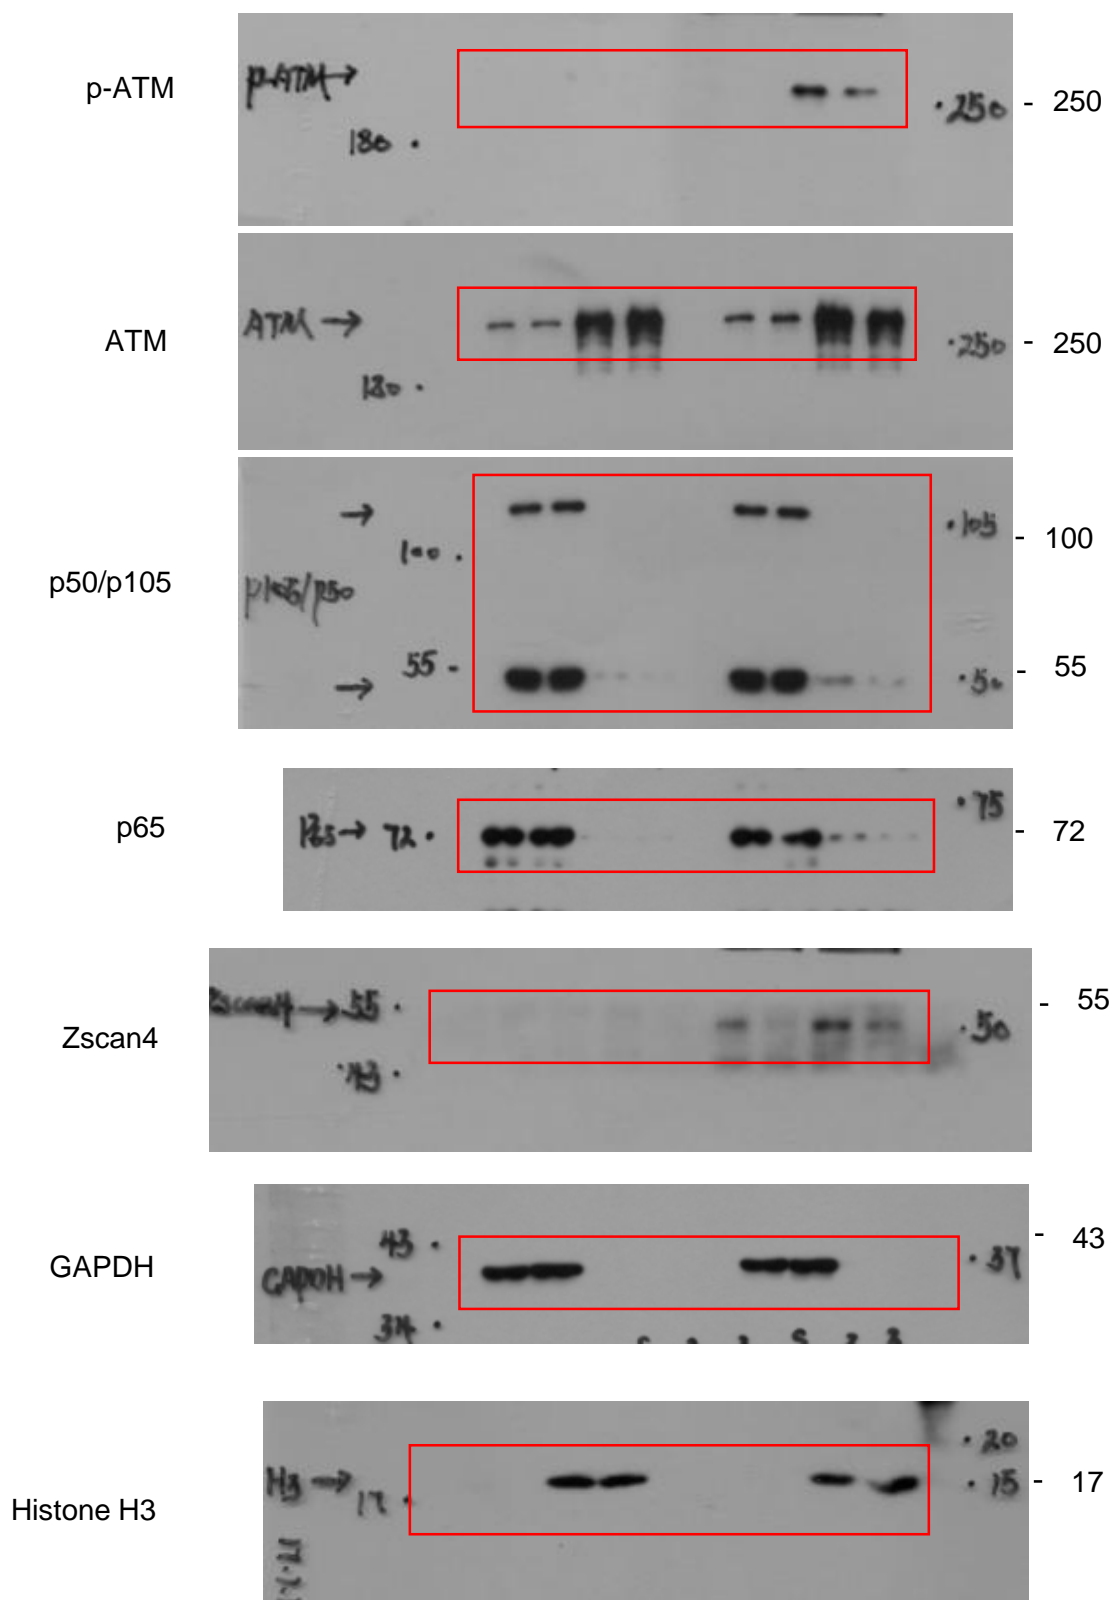

Supplementary Figure 13. The uncropped scans of immunoblots (continued)



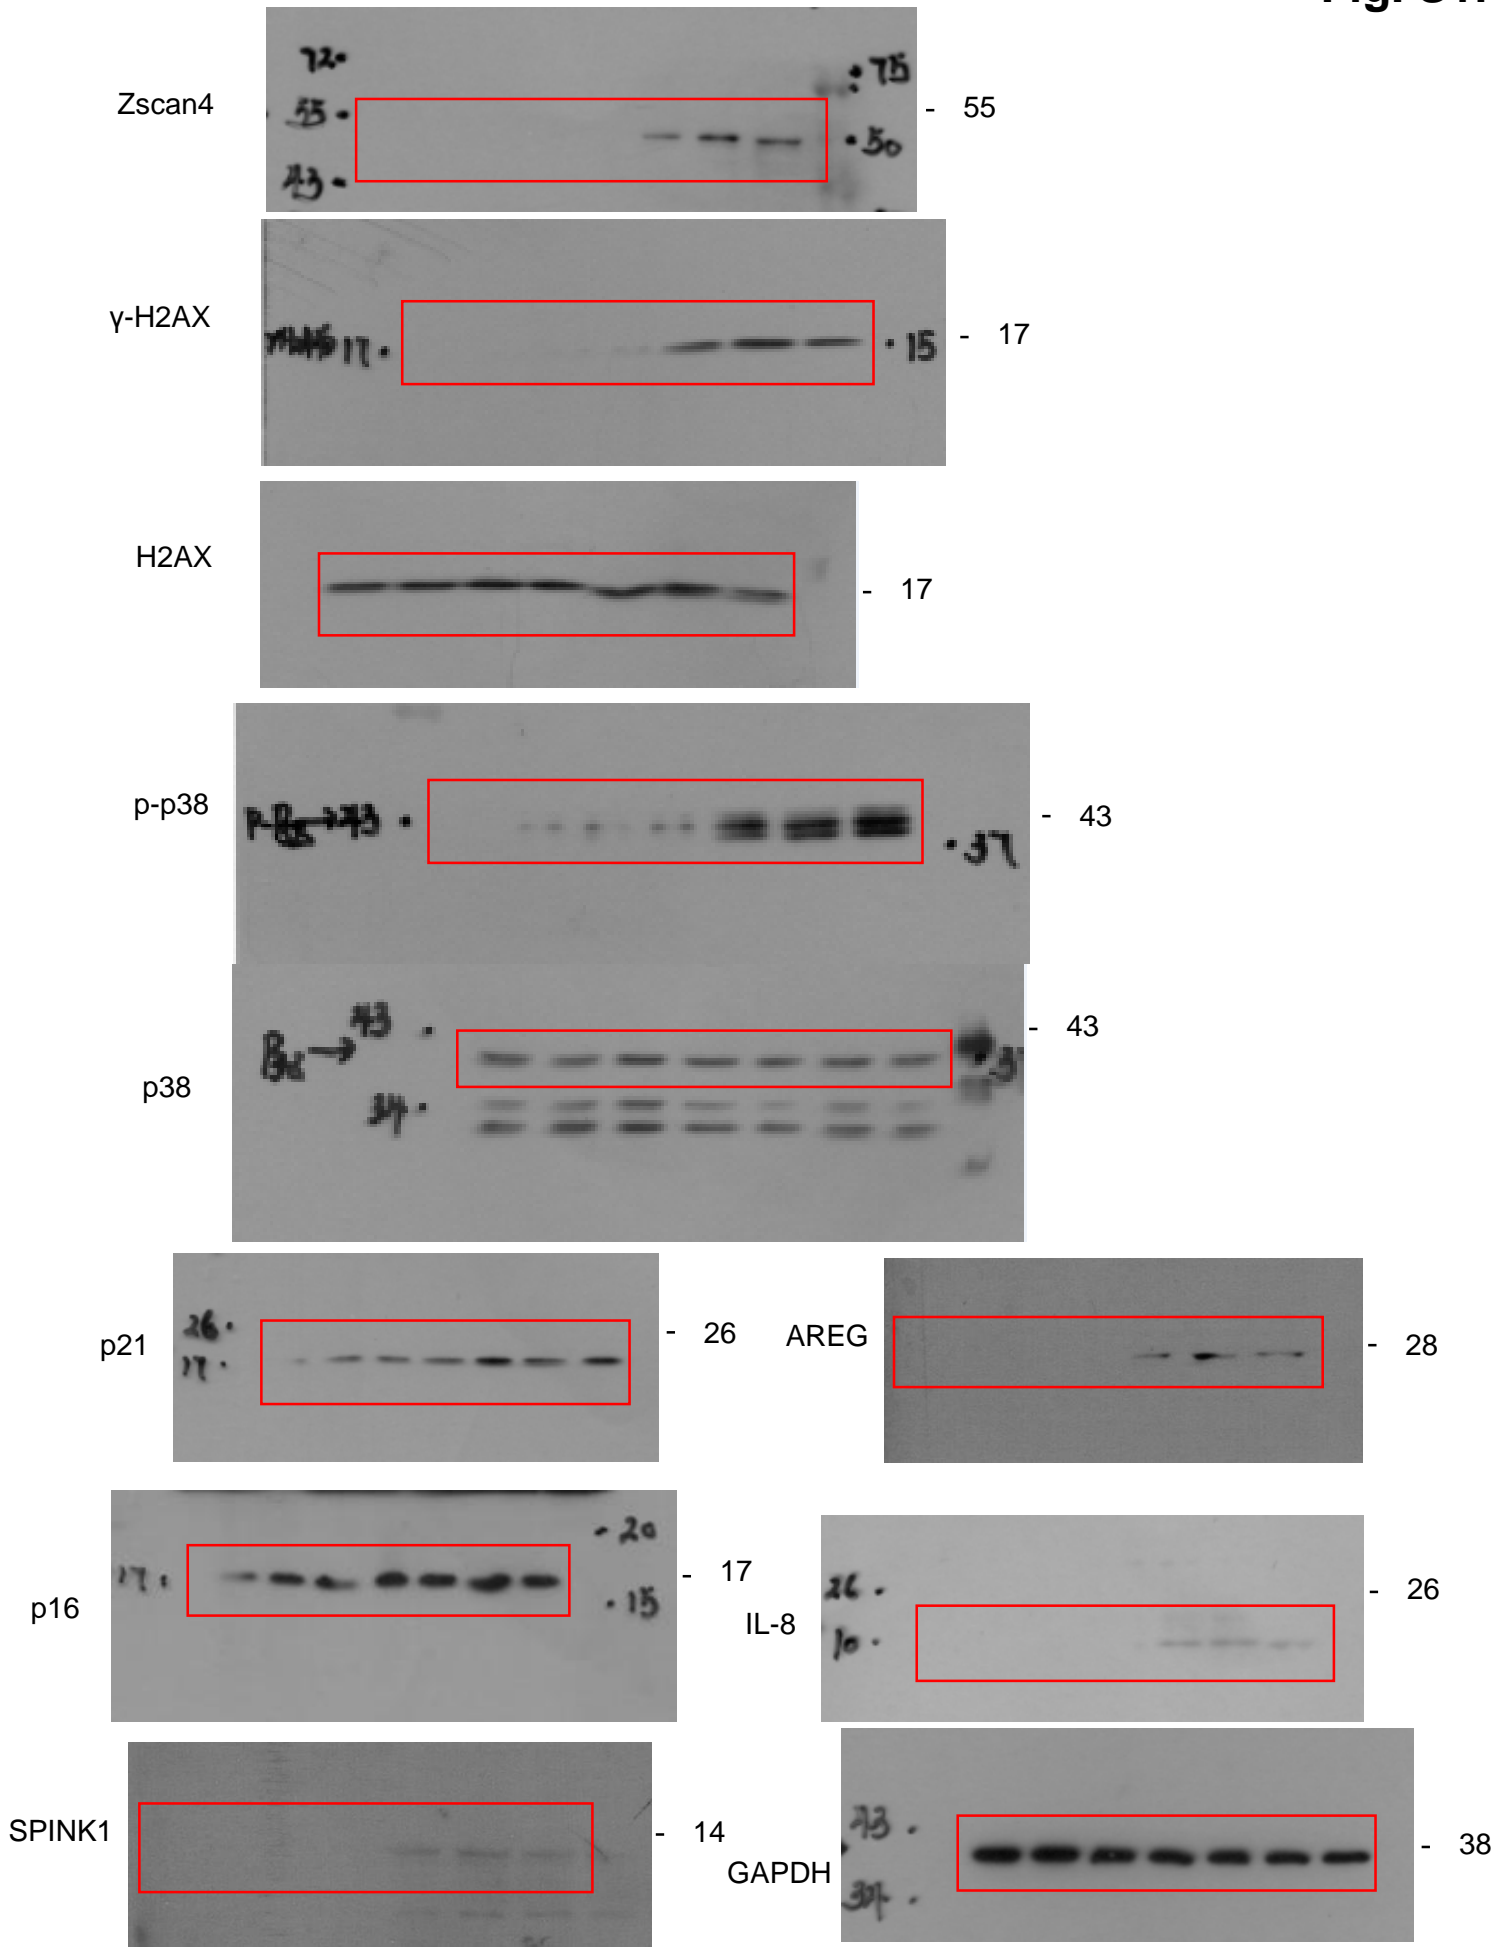

Supplementary Figure 13. The uncropped scans of immunoblots (continued)

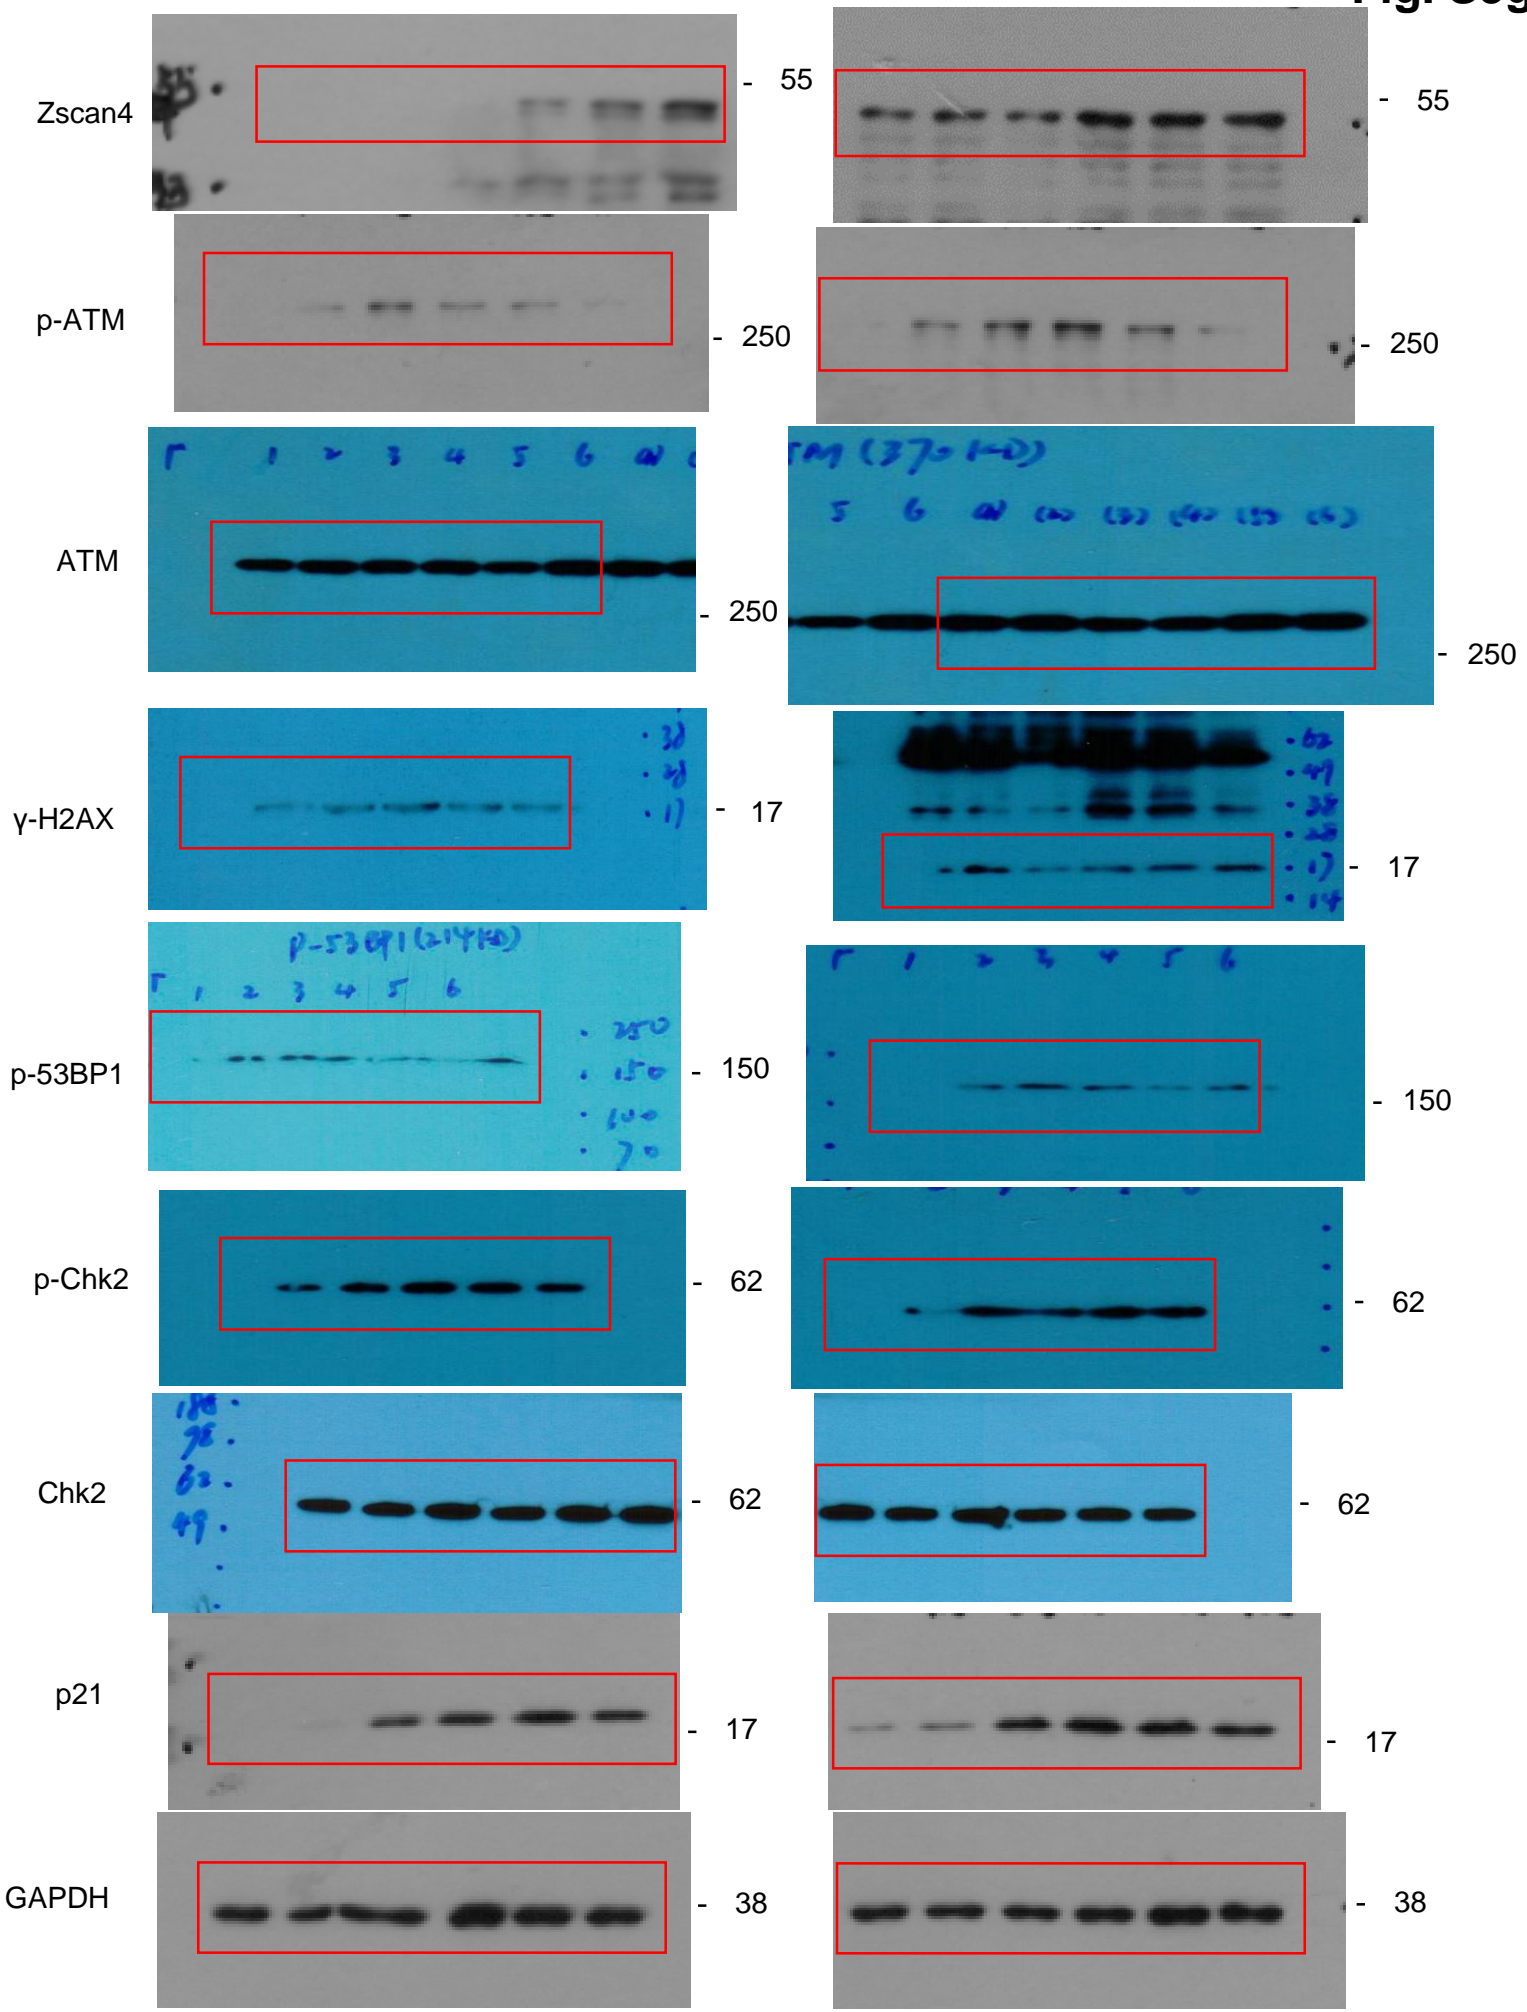

Supplementary Figure 13. The uncropped scans of immunoblots (continued)

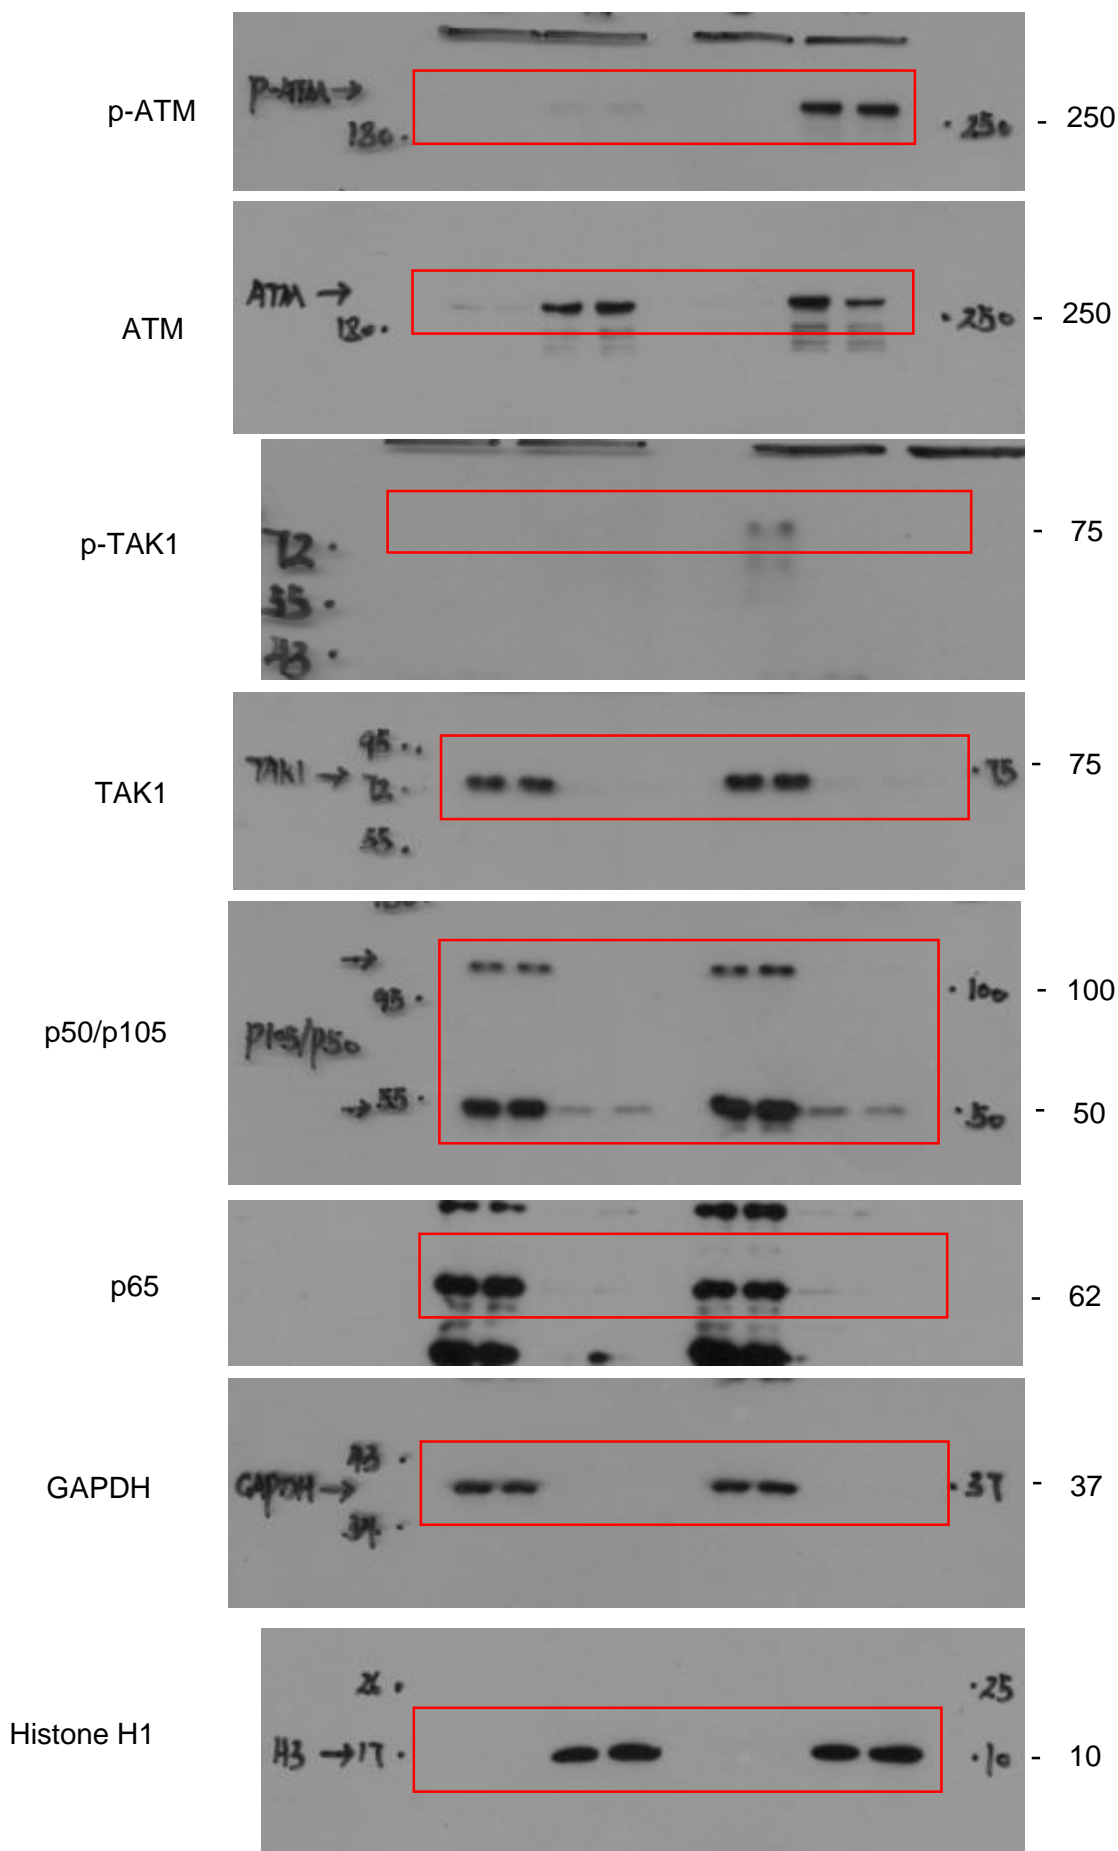

Supplementary Figure 13. The uncropped scans of immunoblots (continued)

**Supplementary Table 1 (Primer sequences for qRT-PCR assays)**

| <b>Target name</b> | <b>Forward (5'-3')</b> | <b>Reverse (5'-3')</b> |
|--------------------|------------------------|------------------------|
| <b>IL-6</b>        | TACCCCCAGGAGAAGATTCC   | TTTTCTGCCAGTGCCTCTTT   |
| <b>IL-8</b>        | GTGCAGTTTTGCCAAGGAGT   | CTCTGCACCCAGTTTTTCCTT  |
| <b>TIMP-1</b>      | AATTCCGACCTCGTCATCAG   | TGCAGTTTTCCAGCAATGAG   |
| <b>CSF2</b>        | CCCCAGTCACCTGCTGTTAT   | TGGAATCCTGAACCCACTTC   |
| <b>SPINK1</b>      | CCTTGGCCCTGTTGAGTCTA   | GCCCAGATTTTTGAATGAGG   |
| <b>SFRP2</b>       | GCCTCGATGACCTAGACGAG   | GATGCAAAGGTCGTTGTCCT   |
| <b>AREG</b>        | TGGATTGGACCTCAATGACA   | AGCCAGGTATTTGTGGTTCG   |
| <b>EREG</b>        | CGTGTGGCTCAAGTGTC AAT  | TGGAACCGACGACTGTGATA   |
| <b>ANGPTL4</b>     | GCCTATAGCCTGCAGCTCAC   | AGTACTGGCCGTTGAGGTTG   |
| <b>MMP3</b>        | GCAGTTTGCTCAGCCTATCC   | GAGTGTCCGAGTCCAGCTTC   |
| <b>WNT16B</b>      | GCTCCTGTGCTGTGAAAACA   | TGCATTCTCTGCCTTGTGTC   |
| <b>Zscan4</b>      | CTAGGCCTGAAGAGGGAGGT   | CTCCATGGGATCCTTTCTGA   |
| <b>IL-2</b>        | TGCAACTCCTGTCTTGCATT   | GCCTTCTTGGGCATGTAAAA   |
| <b>IL-12</b>       | GATGGCCCTGTGCCTTAGTA   | TCAAGGGAGGATTTTTGTGG   |
| <b>CXCL1</b>       | AGGGAATTCACCCCAAGAAC   | TGGATTTGTCACTGTTTCAGCA |
| <b>RPL13A</b>      | GTACGCTGTGAAGGCATCAA   | CGCTTTTTCTTGTCTAGGG    |

**Supplementary Table 2 (key resources table)**

| <b>REAGENT or RESOURCE</b>              | <b>SOURCE</b>  | <b>IDENTIFIER</b> |
|-----------------------------------------|----------------|-------------------|
| <b>Antibodies</b>                       |                |                   |
| ATM (rabbit) (1:1000)                   | Abways         | Cat# CY5207       |
| Phosphor-ATM (rabbit) (1:1000)          | Abways         | Cat# CY5111       |
| 53BP1 (rabbit) (1:1000)                 | Proteintech    | Cat# 20002-1-AP   |
| Phosphor-53BP1 (mouse) (1:1000)         | Santa Cruz     | Cat# sc-135748    |
| H2AX (rabbit) (1:2000)                  | Proteintech    | Cat# 10856-1-AP   |
| $\gamma$ -H2AX (rabbit) (1:1000)        | Cell signaling | Cat #9718         |
| TRAF6 (rabbit) (1:1000)                 | Abways         | Cat# CY5174       |
| TAK1 (rabbit) (1:1000)                  | Proteintech    | Cat# 12330-2-AP   |
| Phosphor-TAK1 (rabbit) (1:1000)         | Abcam          | Cat# ab109404     |
| p38 (rabbit) (1:1000)                   | Proteintech    | Cat# 14064-1-AP   |
| Phosphor-p38 (rabbit) (1:2000)          | R&D            | Cat# AF869        |
| JNK (rabbit) (1:1000)                   | Proteintech    | Cat# 10023-1-AP   |
| Phosphor-JNK (rabbit) (1:1000)          | Cell signaling | Cat# 4668         |
| mTOR (rabbit) (1:1000)                  | Proteintech    | Cat# 20657-1-AP   |
| Phosphor-mTOR (rabbit) (S2448) (1:1000) | Cell signaling | Cat# 2971         |
| AKT (rabbit) (1:2000)                   | Proteintech    | Cat# 10176-2-AP   |
| Phosphor-AKT (rabbit) (S473) (1:1000)   | Abcam          | Cat# ab81283      |
| p105/p50 (rabbit) (1:1000)              | Abways         | Cat# CY5040       |
| p65 (mouse) (1:1000)                    | Santa Cruz     | Cat# sc-8008      |
| Zscan4 (rabbit) (1:1000)                | Abclonal       | Cat# A12015       |
| IL-8 (rabbit) (1:1000)                  | Proteintech    | Cat# 60141-2-Ig   |
| E-cadherin (rabbit) (1:2000)            | Proteintech    | Cat# 20874-1-AP   |
| N-cadherin (rabbit) (1:2000)            | Proteintech    | Cat# 22018-1-AP   |
| Vimentin (mouse) (1:2000)               | Vazyme         | Cat# Ab101        |
| GAPDH (mouse) (1:2000)                  | Vazyme         | Cat# Ab103        |
| $\beta$ -actin (goat) (1:1000)          | Santa Cruz     | Cat# sc-1615      |
| Histone H1 (rabbit) (1:500)             | Proteintech    | Cat# 17510-1-AP   |
| Histone H3 (rabbit) (1:1000)            | Proteintech    | Cat# 17168-1-AP   |
| AREG (goat) (1:500)                     | R&D            | Cat# AF262        |
| IL-1 $\alpha$ (mouse) (1:500)           | R&D            | Cat# MAB200R      |
| IL-7 (goat) (1:400)                     | R&D            | Cat# AF407        |
| IL-8 (mouse) (1:500)                    | R&D            | Cat# MAB208       |
| MKK6 (rabbit) (1:1000)                  | Cell signaling | Cat# 8550         |
| GST (mouse) (1:500)                     | Cell signaling | Cat# 2614         |
| Raptor (mouse) (1:500)                  | Millipore      | Cat# 05-1470      |
| SFRP2 (rabbit) (1:400)                  | Millipore      | Cat# 06-004       |
| p70 S6K1 (rabbit) (1:500)               | Proteintech    | Cat# 14485-1-AP   |
| Phosphor-p70 S6K1 (rabbit) (1:1000)     | Millipore      | Cat# 07-018       |
| 4E-BP1 (mouse) (1:1000)                 | Santa Cruz     | Cat# sc-81149     |
| Phosphor-4E-BP1 (rabbit) (1:500)        | Cell signaling | Cat# 13396        |

|                                                                     |                     |                                 |
|---------------------------------------------------------------------|---------------------|---------------------------------|
| S6 ribosomal protein (rabbit) (1:1000)                              | Cell signaling      | Cat# 2217                       |
| Phosphor-S6 (rabbit) (1:1000)                                       | Cell signaling      | Cat# 4858                       |
| IKK $\alpha$ (rabbit) (1:1000)                                      | Cell signaling      | Cat# 2682                       |
| Phosphor-IKK $\alpha$ (rabbit) (1:500)                              | Cell signaling      | Cat# 2697                       |
| IKK $\beta$ (mouse) (1:1000)                                        | Novus Biologicals   | Cat# NB100-56509                |
| Phosphor-IKK $\beta$ (rabbit) (1:200)                               | Bioss               | Cat# bs-3232R                   |
| IRAK1 (rabbit) (1:500)                                              | Abcam               | Cat# ab5522                     |
| IL-24 (goat) (1:400)                                                | R&D                 | Cat# AF1965                     |
| IKB $\alpha$ (rabbit) (1:500)                                       | Abcam               | Cat# ab32518                    |
| PI3K-p110 (mouse) (1:1000)                                          | Santa Cruz          | Cat# sc-8010                    |
| PI3K-p85 (rabbit) (1:500)                                           | Epitomics           | Cat# 5405-1                     |
| SPINK1 (mouse) (1:500)                                              | Abnova              | Cat# H00006690-M01              |
| WNT16B (mouse) (1:1000)                                             | BD Biosciences      | Cat# 552595                     |
|                                                                     |                     |                                 |
| <b>Chemicals, Peptides, and Recombinant Proteins</b>                |                     |                                 |
| MK-2206                                                             | Selleck Chemicals   | S1078; CAS:<br>1032350-13-2     |
| SB203580                                                            | MedChem Express     | HY-10256; CAS:<br>152121-47-6   |
| RAD001                                                              | Selleck Chemicals   | S1120; CAS:<br>159351-69-6      |
| 5Z-7-Oxozeaenol                                                     | TOCRIS              | 3604; CAS: 66018-38-0           |
| PP242                                                               | Selleck Chemicals   | S2218; CAS:<br>1092351-67-1     |
| ATP, [ $\gamma$ - <sup>32</sup> P]-3000Ci/mmol 10mCi/ml Lead, 5 mCi | Perkin Elmer        | NEG002A005MC;CAS:<br>51963-61-2 |
| KU55933                                                             | TOCRIS              | 3544; CAS: 587871-26-9          |
| BAY 11-7082                                                         | Selleck Chemicals   | S2913; CAS: 19542-67-7          |
| Bleomycin                                                           | Selleck Chemicals   | S1214; CAS: 9041-93-4           |
| Mitoxantrone                                                        | Selleck Chemicals   | S1889; CAS: 65271-80-9          |
| Satraplatin                                                         | MedChem Express     | HY-17576; CAS:<br>129580-63-8   |
| Docetaxel                                                           | TOCRIS              | 4056; CAS: 114977-28-5          |
| Paclitaxel                                                          | MedChem Express     | HY-B0015; CAS:<br>33069-62-4    |
| Vincristine                                                         | Selleck Chemicals   | S1241; CAS: 2068-78-2           |
| D-Luciferin                                                         | BioVision           | 7903; CAS: 115144-35-9          |
| Recombinant Human IL-1 $\alpha$                                     | R&D                 | 200-LA                          |
| Calf Intestinal Phosphatase                                         | New England Biolabs | M0290S                          |
| Normal Goat Serum                                                   | Thermo Fisher       | 01-6201                         |
|                                                                     |                     |                                 |
| <b>Critical Commercial Assays</b>                                   |                     |                                 |
| Caspase Glo 3/7                                                     | Promega             | G8090                           |

|                                                            |                                |               |
|------------------------------------------------------------|--------------------------------|---------------|
| Dual-Luciferase® Reporter Assay System                     | Promega                        | E1910         |
| Beta-Galactosidase Staining Kit                            | BioVision                      | K802-250      |
| BrdU In Vitro Labeling Kit                                 | BD Pharmingen                  | 550891        |
|                                                            |                                |               |
| <b>Deposited Data</b>                                      |                                |               |
| Raw and analyzed data                                      | This paper                     | GEO: GSE82033 |
| Raw and analyzed data                                      | This paper                     | GEO: GSE90866 |
|                                                            |                                |               |
| <b>Experimental Models: Cell Lines</b>                     |                                |               |
| BPH1                                                       | Gift from Prof Simon Hayward   | N/A           |
| M12                                                        | Gift from Prof Stephen Plymate | N/A           |
| PC3                                                        | ATCC                           | N/A           |
| DU145                                                      | ATCC                           | N/A           |
| LNCaP                                                      | ATCC                           | N/A           |
| PSC27                                                      | Gift from Prof Peter Nelson    | N/A           |
|                                                            |                                |               |
| <b>Experimental Models: Organisms/Strains</b>              |                                |               |
| Mouse: ICR SCID                                            | Taconic                        | ICRSC         |
|                                                            |                                |               |
| <b>Oligonucleotides</b>                                    |                                |               |
| shRNA1 targeting sequence:Zscan4:<br>AATCTTGGATCAGAAAATTCA | This paper                     | N/A           |
| shRNA2 targeting sequence:Zscan4:<br>CAAATAGTTTCCCTAATCATC | This paper                     | N/A           |
| shRNA3 targeting sequence:Zscan4:<br>CTACGGGTGCATCAGATAATT | This paper                     | N/A           |
| shRNA1 targeting sequence:TAK1:<br>CCCGTGTGAACCATCCTAATA   | This paper                     | N/A           |
| shRNA2 targeting sequence:TAK1:<br>CGCCCTTCAATGGAGGAAATT   | This paper                     | N/A           |
| shRNA3 targeting sequence:TAK1:<br>CATCCCAATGGCTTATCTTAC   | This paper                     | N/A           |
| shRNA1 targeting sequence:TRAF6:<br>GCCACGGGAAATATGTAATAT  | This paper                     | N/A           |
| shRNA2 targeting sequence:TRAF6:<br>CGGAATTTCCAGGAAACTATT  | This paper                     | N/A           |

|                                                                        |                 |                                                                       |
|------------------------------------------------------------------------|-----------------|-----------------------------------------------------------------------|
| shRNA3 targeting sequence:TRAF6:<br>CCTGGATTCTACACTGGCAAA              | This paper      | N/A                                                                   |
| shRNA1 targeting sequence:IL-1 $\alpha$ :<br>GCCAAAGTTCCAGACATGTTT     | This paper      | N/A                                                                   |
| shRNA2 targeting sequence:IL-1 $\alpha$ :<br>GAATGACGCCCTCAATCAAAG     | This paper      | N/A                                                                   |
| shRNA3 targeting sequence:IL-1 $\alpha$ :<br>GCCAATGATCAGTACCTCACG     | This paper      | N/A                                                                   |
| Scramble shRNA sequence:<br>GATTAATAGGATTGCAGAATT                      | This paper      | N/A                                                                   |
| See Table S1 for primers used for SASP qRT-PCR assays                  | This paper      | N/A                                                                   |
| See Table S2 for Primers used for Zscan4 promoter cloning and CHIP PCR | This paper      | N/A                                                                   |
|                                                                        |                 |                                                                       |
| <b>Recombinant DNA</b>                                                 |                 |                                                                       |
| Plasmid: pLenti-CMV-Zscan4-puro                                        | This paper      | N/A                                                                   |
| Plasmid: pCMV-Flag-IKK $\alpha$                                        | This paper      | N/A                                                                   |
| Plasmid: pCMV-GST-mTOR                                                 | This paper      | N/A                                                                   |
| Plasmid: pCMV-VSV-G                                                    | Addgene         | 8454                                                                  |
| Plasmid: pCMV-dR8.2dvpr                                                | Addgene         | 8455                                                                  |
| Plasmid: pLKO.1 puro                                                   | Addgene         | 8453                                                                  |
|                                                                        |                 |                                                                       |
| <b>Software and Algorithms</b>                                         |                 |                                                                       |
| CellProfiler                                                           | Broad Institute | <a href="http://www.cellprofiler.org">http://www.cellprofiler.org</a> |
| R version 3.1.2                                                        | R Foundation    | <a href="https://www.r-project.org">https://www.r-project.org</a>     |
| PANTHER                                                                | Thomas Lab      | <a href="http://pantherdb.org/">http://pantherdb.org/</a>             |



|                                        |                                        |                                                                                                                                                                                                                     |
|----------------------------------------|----------------------------------------|---------------------------------------------------------------------------------------------------------------------------------------------------------------------------------------------------------------------|
| Venn diagram                           | Bioinformatics & Evolutionary Genomics | <a href="http://bioinformatics.psb.ugent.be/webtools/Venn/">http://bioinformatics.psb.ugent.be/webtools/Venn/</a>                                                                                                   |
| Gene Set Enrichment Analysis           | Broad Institute                        | <a href="http://software.broadinstitute.org/gsea/index.jsp">http://software.broadinstitute.org/gsea/index.jsp</a>                                                                                                   |
| NetworkAnalyst                         | McGill                                 | <a href="http://www.networkanalyst.ca">www.networkanalyst.ca</a>                                                                                                                                                    |
| Agilent GeneSpring GX software (v12.1) | Agilent Technologies                   | <a href="http://www.agilent.com/en-us/products/software-informatics/life-sciences-informatics/genespring-gx">http://www.agilent.com/en-us/products/software-informatics/life-sciences-informatics/genespring-gx</a> |
| Prism5                                 | GraphPad                               | <a href="http://www.graphpad.com/scientificsoftware/prism">www.graphpad.com/scientificsoftware/prism</a>                                                                                                            |
|                                        |                                        |                                                                                                                                                                                                                     |

**Supplementary Table 3**  
**(Primer sequences for Zscan4 promoter cloning and CHIP-PCR assays)**

**A. Promoter cloning**

| <b>Amplicon name</b> | <b>Forward</b>            | <b>Reverse</b>            |
|----------------------|---------------------------|---------------------------|
| Zscan4-P01           | CAGTGGCTGTGTGTCTTTGCCTTC  | GTGGCAGAGGGCAAGGCTAATGCTG |
| Zscan4-P02           | CTACATACTGAGGCGGATTGGC    | GTGGCAGAGGGCAAGGCTAATGCTG |
| Zscan4-P03           | GGGGACCCAGTCTTTGCGTTCA    | GTGGCAGAGGGCAAGGCTAATGCTG |
| Zscan4-P04           | CTTTGCGAGGCCCAAGTAGGTTTAC | GTGGCAGAGGGCAAGGCTAATGCTG |
| Zscan4-P05           | TGCACTCTGCTAATGCAAGCTACAG | GTGGCAGAGGGCAAGGCTAATGCTG |
| Zscan4-P06           | AGCGCCCCCTCCTCATGGAGACCG  | GTGGCAGAGGGCAAGGCTAATGCTG |

**B. CHIP-PCR**

| <b>Amplicon name</b> | <b>Forward</b>           | <b>Reverse</b>           |
|----------------------|--------------------------|--------------------------|
| Zscan4-p1            | AGCGCCCCCTCCTCATGGAGACCG | CATGAGGACTGCCAGGCTCTCAGA |
| Zscan4-p2            | CACTCCTGTAATCCCAACAC     | GTTCAAGCAATTCTCCTGCC     |
| Zscan4-p3            | AGCACTACCTGCCTTCCCAA     | ATGAGCAGGAGGATTTATCC     |
| WNT16B-p1            | CAGGAAAGGTCATGACACACC    | AGAGCAGCCTGGGGATCT       |
| SFRP2-p1             | ATTCATTACCCGGCTCCTCT     | CCTGCCTAGAGATCCACGAG     |
| IL-6-p1              | AAATGCCCAACAGAGGTCA      | CACGGCTCTAGGCTCTGAAT     |
| IL-8-p1              | AAAACCTATAGGAGCTACATT    | TCGCTTCTGGGCAAGTACA      |

**Supplementary Table 4 (Clinical and histopathological features of NSCLC patients)**

| ID        | CS   | TNM     | DS | MD (cm) | DFS | DFS time (M) | Z score | T score |
|-----------|------|---------|----|---------|-----|--------------|---------|---------|
| 151113    | IIIa | T2N2M0  | 1  | 6.5     | 0   | 40           | 0.5     | 0.6     |
| 151535    | Ib   | T2aN0M0 | 1  | 4       | 0   | 41           | 1.5     | 1.8     |
| 145951    | Ib   | T2aN0M0 | 1  | 4       | 0   | 38           | 1.2     | 1.5     |
| 144996    | Ib   | T2aN0M0 | 1  | 3.2     | 0   | 39           | 1.4     | 1.2     |
| 142402    | Ib   | T2N0M0  | 3  | 1.6     | 0   | 60           | 1.0     | 1.4     |
| 140984    | Ib   | T2aN0M0 | 1  | 2.5     | 0   | 64           | 1.0     | 1.5     |
| 122657    | IIIa | T2N2M0  | 1  | 8       | 1   | 43           | 3.5     | 3.8     |
| 120144    | IV   | T2N2M1  | 1  | 3.6     | 0   | 59           | 0.5     | 0.7     |
| 120415    | IV   | T4N0M1  | 1  | 1.7     | 1   | 32           | 2.5     | 3.0     |
| 155010    | Ib   | T2N0M0  | 3  | 2       | 0   | 74           | 1.1     | 1.4     |
| 136492    | IIb  | T3N0M0  | 3  | 5.5     | 0   | 93           | 0.2     | 0.4     |
| 145779    | Ia   | T1bN0M0 | 2  | 2       | 0   | 52           | 0.7     | 0.7     |
| 143105    | Ib   | T2aN0M0 | 2  | 2.5     | 0   | 53           | 1.2     | 1.0     |
| 121724    | Ib   | T2N0M0  | 3  | 3       | 0   | 59           | 0.4     | 0.5     |
| 136189    | IV   | T2aN0M1 | 3  | 3       | 0   | 47           | 0.5     | 0.9     |
| 146462    | Ib   | T2N0M0  | 1  | 0.8     | 0   | 62           | 1.8     | 1.9     |
| 132109    | IV   | T2N1M1a | NA | 2       | 0   | 82           | 1.1     | 1.5     |
| 136740    | IIIa | T2aN1M0 | 1  | 1.5     | 0   | 63           | 0.2     | 0.5     |
| 135413    | Ib   | T2N0M0  | 1  | 1.5     | 1   | 47           | 1.5     | 1.5     |
| 112881    | IIIb | T4N0M0  | 1  | 2.5     | 1   | 40           | 1.8     | 1.5     |
| 110410    | IIb  | T2N1M0  | NA | 2.5     | 1   | 33           | 2.5     | 2.9     |
| 103911    | IIIb | T4N0M0  | NA | 2       | 0   | 92           | 0.7     | 0.3     |
| 111506    | IV   | T2N1M1  | 2  | 1.7     | 0   | 109          | 0.5     | 0.8     |
| 121792    | Ib   | T2N0M0  | 2  | 1       | 1   | 63           | 3       | 3.5     |
| 123353    | IIIa | T4N0M0  | 1  | 2.2     | 0   | 62           | 0.2     | 0.2     |
| 134769    | IIIa | T2aN2M0 | 1  | 4       | 0   | 40           | 0.8     | 1       |
| 120667    | IIb  | T2N1M0  | 2  | 1.5     | 0   | 61           | 0.9     | 1.2     |
| 113755 A4 | IIIa | T3N2M0  | 1  | NA      | 0   | 63           | 1.1     | 1       |
| 114273 A1 | IIIb | T4N2M0  | 1  | NA      | 0   | 65           | 0.4     | 0       |
| 114390 A4 | IV   | T3N2M1  | 2  | 3       | 0   | 62           | 1.4     | 1.8     |
| 114449 A1 | IIIa | T2N2M0  | 2  | 1       | 1   | 62           | 3.6     | 4       |
| 121504 A1 | IIIa | T2N2M0  | 1  | 9       | 1   | 56           | 2.8     | 2.5     |
| 121749 A2 | IIa  | T3N0M0  | 2  | 2.5     | 0   | 55           | 0.7     | 0.9     |
| 122847 A4 | IIa  | T3N0M0  | NA | 5       | 0   | 54           | 0.9     | 0.5     |
| 122901 A1 | IIIa | T2bN2M0 | NA | 5       | 0   | 57           | 1       | 1.5     |
| 123284 A1 | IIIa | T2N2M0  | NA | 3       | 0   | 53           | 0.9     | 1.2     |
| 124141 A4 | IIIa | T2bN2M0 | 1  | NA      | 0   | 51           | 0.5     | 0.9     |
| 124450 A2 | Ib   | T2aN0M0 | NA | 5       | 0   | 52           | 0.9     | 1.2     |
| 126255 A3 | IIIa | T2N2M0  | 2  | 2.5     | 0   | 48           | 1.4     | 1.6     |
| 130647 A2 | IIIb | T4N2M0  | 1  | 5       | 0   | 48           | 0.7     | 0.9     |
| 130681 A0 | IIIb | T4N2M0  | NA | 0.3     | 0   | 47           | 0.8     | 1       |
| 130819 B0 | Ia   | T1aN0M0 | NA | 1.1     | 0   | 46           | 0.9     | 1.1     |
| 130961 A1 | IIIa | T2N2M0  | NA | 0.3     | 0   | 57           | 1.2     | 1.5     |
| 132330 B0 | Ia   | T1aN0M0 | NA | 2.8     | 0   | 44           | 1.1     | 0.7     |
| 132557 A1 | IIIa | T2N2M0  | NA | NA      | 0   | 43           | 0.8     | 0.8     |
| 132683 A2 | IIIa | T4N0M0  | NA | NA      | 0   | 44           | 0.6     | 1.2     |
| 133582 A4 | IIIa | T2bN2M0 | 1  | 2       | 0   | 42           | 0.9     | 0.6     |
| 134675 A3 | Ib   | T2aN2M0 | 1  | 3.5     | 0   | 43           | 0.6     | 0.6     |
| 146648 A4 | Ib   | T2aN2M0 | 2  | 3       | 0   | 27           | 0.5     | 1       |
| 147707 A3 | IIIa | T2N2M0  | 1  | 4       | 0   | 28           | 1.2     | 1.5     |
| 148025 A2 | IIIb | T4N2M0  | 2  | 3.5     | 1   | 21           | 3.2     | 3       |
| 149209 A2 | IIIb | T4N2M0  | 2  | 1.3     | 0   | 27           | 0.5     | 0.5     |
| 150130 B1 | IIIa | T2aN2M0 | 2  | 2.5     | 0   | 24           | 0.3     | 0       |
| 150449 A5 | IIIa | T4N1M0  | 2  | 4       | 0   | 23           | 1.3     | 1.5     |

|           |      |         |    |     |   |     |     |     |
|-----------|------|---------|----|-----|---|-----|-----|-----|
| 151691 A1 | IIIa | T4N0M0  | 2  | 1   | 0 | 21  | 1   | 1.8 |
| 120706    | IIIa | T4N0M0  | 2  | 0.8 | 0 | 80  | 0.5 | 0.8 |
| 072521    | IIIa | T4N0M0  | NA | NA  | 0 | 108 | 2.9 | 2.5 |
| 072915    | IIIa | T4N0M0  | NA | NA  | 0 | 108 | 3.5 | 3.8 |
| 130960    | Ib   | T2aN0M0 | 2  | 1.2 | 1 | 19  | 3.5 | 3.8 |
| 137395    | IIIa | T4N1M0  | 2  | 1.5 | 1 | 60  | 4   | 3.9 |
| 134232-2  | Ila  | T2bN0M0 | 2  | 7   | 1 | 63  | 2.5 | 2.2 |
| 125687-1  | IIIa | T2N2M0  | 1  | 4   | 0 | 61  | 1.2 | 1.6 |
| 115002-2  | IIIa | T2aN1M0 | 1  | 4   | 0 | 113 | 2.4 | 2.8 |
| 131153-1  | Ib   | T2N0M0  | 2  | 2   | 0 | 53  | 0.6 | 0.4 |
| 134506-1  | Ia   | T1N0M0  | 1  | 2   | 1 | 33  | 2.5 | 2.8 |
| 136015    | IIIa | T2bN2M0 | 1  | 6   | 0 | 45  | 1.2 | 1.5 |
| 140528    | Ib   | T2N0M0  | 1  | 6   | 0 | 52  | 1.1 | 1.7 |
| 093006    | Ia   | T1N0M0  | 2  | 6.5 | 1 | 97  | 2.9 | 2.4 |
| 112665-1  | Ib   | T2aN0M0 | 2  | 6   | 0 | 103 | 1.4 | 1.8 |
| 132836-2  | Ib   | T2N0M0  | 2  | 2.5 | 0 | 63  | 1.5 | 1.5 |
| 091198-2  | Ib   | T2N0M0  | 2  | 1.5 | 0 | 89  | 1.6 | 1.9 |
| 114810    | IV   | T4N1M1  | 1  | 7   | 0 | 72  | 3.4 | 3.8 |
| 092480    | Ib   | T2N0M0  | NA | 4   | 1 | 94  | 2.5 | 1.5 |
| 147810    | Ib   | T2N0M0  | 2  | 2   | 0 | 60  | 0.6 | 1   |
| 115081-2  | IIIa | T2N2M0  | 2  | 5   | 1 | 79  | 2.6 | 2.2 |
| 090003-2  | IIIa | T2N2M0  | NA | 1   | 1 | 95  | 2.8 | 2.9 |
| 141729    | Ia   | T1bN0M0 | 2  | 4.5 | 1 | 43  | 3   | 2.5 |
| 142221    | Ib   | T2N0M0  | 2  | 4.5 | 1 | 64  | 3.2 | 3.8 |
| 137866    | Ib   | T2N0M0  | 2  | 3   | 0 | 61  | 1.7 | 1.9 |
| 111253-2  | IIIa | T2N2M0  | 2  | 3.5 | 1 | 7   | 2.3 | 2.8 |
| 144139    | IIIa | T2bN2M0 | 2  | 6   | 0 | 38  | 1.3 | 1.7 |
| 148510    | Ila  | T2bN0M0 | 1  | 5   | 0 | 32  | 2.8 | 2.9 |
| 113814-1  | Ilb  | T3N0M0  | 2  | 4   | 0 | 74  | 3.8 | 3.3 |
| 101954    | Ib   | T2N0M0  | 2  | 4.5 | 0 | 109 | 1.7 | 1.9 |
| 112286-1  | Ia   | T1N0M0  | 2  | 3.2 | 0 | 63  | 1   | 0.6 |
| 123646-2  | Ia   | T1N0M0  | 1  | 4   | 0 | 62  | 0.3 | 0.3 |
| 114106    | IIIA | T4N0M0  | 2  | 8   | 0 | 83  | 0.8 | 1   |
| 114349-3  | Ia   | T1aN0M0 | 2  | 1.7 | 0 | 65  | 0.5 | 0.5 |
| 131185    | IIIA | T4N0M0  | 2  | 2   | 1 | 45  | 2.8 | 2.2 |
| 131320-2  | Ia   | T1aN0M0 | 2  | NA  | 0 | 93  | 1.4 | 1.8 |
| 124304-1  | IIIA | T4N0M0  | 2  | 2   | 0 | 74  | 2.2 | 2.2 |
| 100430    | IV   | T3N2M1  | 1  | 1   | 0 | 80  | 0.8 | 0.4 |
| 093202    | Ia   | T1N0M0  | 2  | 2   | 0 | 73  | 0   | 0.8 |
| 112315    | Ia   | T1N0M0  | 2  | 1.5 | 1 | 30  | 3.5 | 3.5 |
| 137782    | IIB  | T3N0M0  | 1  | 5.5 | 1 | 34  | 3.6 | 3.2 |
| 122540    | Ia   | T1N0M0  | 2  | 1.5 | 0 | 46  | 0.6 | 1   |
| 090594    | Ib   | T2N0M0  | 2  | 2.5 | 1 | 40  | 0.8 | 2.2 |
| 091382    | Ib   | T2N0M0  | 2  | 5   | 1 | 66  | 1   | 0.7 |
| 090710    | Ia   | T1N0M0  | 2  | 2.5 | 1 | 75  | 1.5 | 1.9 |

Abbreviations:

ID, pathological ID number;

CS, clinical stage;

TNM, TNM stage;

DS, differentiation stage;

MD, maximal diameter;

DFS, disease free survival status (recurrent/mets/death, 1; no disease, 0);

Z score, Zscan4 score;

T score, TAK1 score.

(Both Z and T scores were averaged from 3 independent blind readings per IHC-stained sample for pathological assessment)

**Supplementary Table 5 (Clinical and histopathological features of BCa patients)**

| ID        | CS   | TNM    | MD | ER  | PR  | ErbB2 | Ki67 | DFS |          |         |         |
|-----------|------|--------|----|-----|-----|-------|------|-----|----------|---------|---------|
|           |      |        |    |     |     |       |      | DFS | time (M) | Z score | T score |
| 153402-17 | Ila  | T2N0M0 | 0  | -   | -   | +     | +    | NA  | 40       | 0.8     | 0.5     |
| 152935-13 | Ilb  | T2N1M0 | 0  | -   | -   | +     | +    | 1   | 32       | 1.4     | 2.9     |
| 161894-16 | Ila  | T2N0M0 | 0  | -   | -   | +     | +    | NA  | 41       | 1.2     | 1.8     |
| 158061-9  | Ila  | T2N0M0 | 0  | +   | -   | +     | +    | NA  | 34       | 1       | 0.5     |
| 158060-14 | Ila  | T2N0M0 | 0  | +   | -   | +     | +    | NA  | 28       | 0       | 0.7     |
| 187928-15 | I    | T1N0M0 | 0  | ++  | -   | ++    | +    | NA  | 14       | 0.5     | 1       |
| 180393-22 | IIIa | T1N2M0 | 0  | -   | -   | -     | +    | 1   | 22       | 2.9     | 2.2     |
| 190855-11 | Ila  | T1N1M0 | 0  | ++  | +   | -     | +    | 1   | 22       | 1.5     | 1.9     |
| 166497-34 | Ila  | T2N1M0 | 0  | +   | -   | -     | +    | 1   | 12       | 2.7     | 2.0     |
| 178259-14 | Ila  | T1N1M0 | 0  | -   | -   | +++   | +    | 1   | 17       | 1.0     | 1.6     |
| 162598-16 | IIIa | T1N2M0 | 0  | -   | -   | ++    | +    | 1   | 14       | 2.5     | 2.5     |
| 183638-14 | Ila  | T2N0M0 | 0  | +   | +   | +++   | +    | NA  | 25       | 0.5     | 0.9     |
| 187862-15 | Ilb  | T2N1M0 | 0  | +   | -   | -     | +    | 1   | 14       | 3.5     | 3.8     |
| 190220-35 | Ila  | T2N0M0 | 0  | +++ | -   | -     | +    | NA  | 20       | 3.0     | 3.5     |
| 182175-13 | Ila  | T2N0M0 | 0  |     | -   | +++   | +    | NA  | 33       | 2.2     | 2.1     |
| 184543-11 | Ila  | T2N0M0 | 0  | -   | +   | +++   | +    | NA  | 14       | 1.2     | 1.2     |
| 179751-16 | Ila  | T1N1M0 | 0  | +   | -   | -     | +    | 1   | 24       | 1.1     | 1.8     |
| 180720-9  | Ila  | T1N1M0 | 0  | +   | +   | +     | +    | 1   | 22       | 3.0     | 3.8     |
| 180718-18 | Ilb  | T2N1M0 | 0  | -   | -   | +     | +    | 1   | 23       | 2.3     | 2.8     |
| 184776-28 | IIIa | T1N2M0 | 0  | +   | -   | -     | +    | 1   | 25       | 3.6     | 3.1     |
| 180714-13 | Ilb  | T3N0M0 | 1  | -   | -   | +++   | +    | NA  | 18       | 1.2     | 1.8     |
| 179955-14 | Ila  | T2N0M0 | 0  | -   | -   | +++   | +    | NA  | 29       | 0       | 0.5     |
| 183244-14 | Ilb  | T2N1M0 | 0  | -   | -   | +++   | +    | 1   | 25       | 2.4     | 2.9     |
| 184023-16 | IIIa | T1N2M0 | 0  | ++  | +   | -     | +    | 1   | 25       | 3.8     | 3.1     |
| 194682-15 | Ilb  | T2N1M0 | 0  | +   |     | +++   | +    | 1   | 17       | 1.5     | 1.0     |
| 97769     | IIIa | T3N2M0 | 1  | -   | -   | +++   | +    | 1   | 28       | 2.5     | 2.9     |
| 113871    | Ilb  | T2N1M0 | 0  | -   | -   | +++   | +    | 1   | 7        | 1.5     | 1.8     |
| 112048    | IIIb | T4N2M0 | 0  | +++ | +++ | +++   | +    | 1   | 9        | 2.5     | 2.1     |
| 112009-2  | IIIa | T3N2M0 | 1  | +++ | ++  | +     | +    | 1   | 9        | 2.8     | 2.2     |
| 112523    | IIIb | T4N2M0 | 0  | +++ | -   | -     | +    | 1   | 9        | 3.6     | 3.9     |
| 113137    | IIIa | T3N2M0 | 1  | -   | -   | +++   | ++   | 1   | 8        | 2.5     | 2.2     |
| 113389    | IIIc | T4N3M0 | 0  | +++ | -   | ++    | +    | 1   | 8        | 3.5     | 3.9     |
| 113432    | Ila  | T1N1M0 | 0  | +++ | +++ | -     | +    | 1   | 8        | 1.6     | 1.0     |
| 113515    | IIIc | T3N3M0 | 1  | +++ | +++ | ++    | +    | 1   | 8        | 3.5     | 3.9     |
| 113668    | I    | T1N0M0 | 0  | -   | -   | -     | +    | 1   | 13       | 1.2     | 2.8     |
| 114304    | I    | T1N0M0 | 0  | -   | -   | +++   | +    | NA  | 13       | 1.2     | 1.2     |
| 114256    | IIIa | T2N2M0 | 0  | -   | -   | +++   | +++  | 1   | 7        | 2.5     | 2.0     |
| 114083    | Ila  | T2N0M0 | 0  | -   | -   | -     | ++   | NA  | 12       | 1.2     | 1.6     |
| 113020-3  | IIIb | T4N2M0 | 0  | -   | -   | ++    | ++   | 1   | 8        | 2.5     | 2.1     |
| 114160    | IIIb | T4N1M0 | 0  | +++ | ++  | +     | +    | 1   | 7        | 3.0     | 3.5     |
| 106548    | IIIa | T1N2M0 | 0  | +   | -   | -     | +    | 1   | 16       | 3.8     | 3.2     |
| 107125    | IIIa | T2N2M0 | 1  | +++ | +++ | -     | ++   | 1   | 15       | 1.5     | 1.9     |
| 108766    | Ilb  | T2N1M0 | 0  | +++ | ++  | ++    | +    | 1   | 13       | 1.8     | 1.8     |
| 108862    | IIIb | T4N1M0 | 1  | +++ | ++  | -     | +    | 1   | 13       | 3.2     | 3.0     |
| 109377-13 | Ilb  | T2N1M0 | 0  | -   | -   | -     | +    | 1   | 12       | 2.4     | 2.9     |
| 102122    | IIIa | T1N2M0 | 0  | +++ | +   | +     | +    | 1   | 10       | 3.0     | 3.7     |
| 103564    | IIIa | T2N2M0 | 0  | +++ | ++  | ++    | +    | 1   | 8        | 2.5     | 2.1     |
| 103781    | I    | T1N0M0 | 0  | ++  | -   | +++   | +    | NA  | 26       | 0.5     | 2.5     |
| 103853    | I    | T1N0M0 | 0  | -   | -   | +     | ++   | NA  | 25       | 0.2     | 0.8     |
| 104419    | Ila  | T2N0M0 | 0  | -   | -   | +++   | ++   | NA  | 25       | 0       | 0.5     |
| 109994    | IIIc | T3N3M0 | 1  | ++  | +   | ++    | +++  | 1   | 12       | 3.5     | 3.8     |
| 110138    | Ilb  | T2N1M0 | 0  | +++ | +   | ++    | ++   | 1   | 13       | 1.5     | 1.2     |

|        |      |        |   |     |     |    |     |    |    |     |     |
|--------|------|--------|---|-----|-----|----|-----|----|----|-----|-----|
| 110292 | Ila  | T2N0M0 | 0 | +   | -   | -  | +   | NA | 13 | 2.8 | 2.8 |
| 110780 | Ilb  | T3N0M0 | 1 | +++ | +++ | ++ | ++  | NA | 17 | 3.0 | 3.5 |
| 99559  | IIIa | T1N2M0 | 0 | +++ | ++  | +  | ++  | 1  | 25 | 2.5 | 2.5 |
| 97922  | Ilb  | T2N1M0 | 0 | +   | -   | -  | +++ | 1  | 28 | 2.7 | 2.2 |
| 100430 | Ila  | T1N1M0 | 0 | -   | -   | ++ | +++ | 1  | 24 | 4.0 | 3.6 |
| 101372 | Ila  | T1N1M0 | 0 | ++  | +++ | ++ | +   | 1  | 23 | 1.5 | 1.1 |
| 111628 | IIIa | T2N2M0 | 0 | +++ | -   | ++ | +   | 1  | 10 | 1.2 | 1.8 |
| 110929 | IIIa | T3N2M0 | 1 | +++ | +++ | -  | +   | 1  | 11 | 2.9 | 3.2 |
| 110875 | I    | T1N0M0 | 0 | -   | -   | -  | +   | NA | 17 | 1.2 | 1.8 |
| 110291 | IIIb | T4N2M0 | 0 | ++  | +++ | -  | +   | 1  | 11 | 4.0 | 3.8 |

Abbreviations:

ID, pathological ID number;

CS, clinical stage;

TNM, TNM stage;

MD, maximal diameter (<5.0 cm, 0; ≥5.0 cm, 1);

DFS, disease free survival status;

ER, estrogen receptor;

PR, progesterone receptor;

ErbB2, Her2 receptor;

Z score, Zscan4 score;

T score, TAK1 score.

(Both Z and T scores were averaged from 3 independent blind readings per IHC-stained sample for pathological assessment)
